# Supplementary material for: Cohort profile: the British Columbia COVID-19 Population Mixing Patterns Survey (BC-Mix)
Source: PubMed Central journal article supplement — BMJ Open. 2022 Aug 24;12(8):e056615. doi: 10.1136/bmjopen-2021-056615 (PMC9412046; doi:10.1136/bmjopen-2021-056615), 2022-08-24
Supplement: bmjopen-2021-056615.draft_revisions.pdf [file bmjopen-2021-056615.draft_revisions.pdf]

# BMJ Open

BMJ Open is committed to open peer review. As part of this commitment we make the peer review history of every article we publish publicly available.

When an article is published we post the peer reviewers' comments and the authors' responses online. We also post the versions of the paper that were used during peer review. These are the versions that the peer review comments apply to.

The versions of the paper that follow are the versions that were submitted during the peer review process. They are not the versions of record or the final published versions. They should not be cited or distributed as the published version of this manuscript.

BMJ Open is an open access journal and the full, final, typeset and author-corrected version of record of the manuscript is available on our site with no access controls, subscription charges or pay-per-view fees (<http://bmjopen.bmj.com>).

If you have any questions on BMJ Open's open peer review process please email [info.bmjopen@bmj.com](mailto:info.bmjopen@bmj.com)

# BMJ Open

## Quantifying contact patterns: development and characteristics of the British Columbia COVID-19 population mixing patterns survey (BC-Mix)

|                               |                                                                                                                                                                                                                                                                                                                                                                                                                                                                                                                                                                                                                                                                                                                                                                                                                                                                                                                                                                                                                                                                                                                                                                                                                                                                                                                                                                                                                                                                                                                                                                           |
|-------------------------------|---------------------------------------------------------------------------------------------------------------------------------------------------------------------------------------------------------------------------------------------------------------------------------------------------------------------------------------------------------------------------------------------------------------------------------------------------------------------------------------------------------------------------------------------------------------------------------------------------------------------------------------------------------------------------------------------------------------------------------------------------------------------------------------------------------------------------------------------------------------------------------------------------------------------------------------------------------------------------------------------------------------------------------------------------------------------------------------------------------------------------------------------------------------------------------------------------------------------------------------------------------------------------------------------------------------------------------------------------------------------------------------------------------------------------------------------------------------------------------------------------------------------------------------------------------------------------|
| Journal:                      | <i>BMJ Open</i>                                                                                                                                                                                                                                                                                                                                                                                                                                                                                                                                                                                                                                                                                                                                                                                                                                                                                                                                                                                                                                                                                                                                                                                                                                                                                                                                                                                                                                                                                                                                                           |
| Manuscript ID                 | bmjopen-2021-056615                                                                                                                                                                                                                                                                                                                                                                                                                                                                                                                                                                                                                                                                                                                                                                                                                                                                                                                                                                                                                                                                                                                                                                                                                                                                                                                                                                                                                                                                                                                                                       |
| Article Type:                 | Cohort profile                                                                                                                                                                                                                                                                                                                                                                                                                                                                                                                                                                                                                                                                                                                                                                                                                                                                                                                                                                                                                                                                                                                                                                                                                                                                                                                                                                                                                                                                                                                                                            |
| Date Submitted by the Author: | 20-Aug-2021                                                                                                                                                                                                                                                                                                                                                                                                                                                                                                                                                                                                                                                                                                                                                                                                                                                                                                                                                                                                                                                                                                                                                                                                                                                                                                                                                                                                                                                                                                                                                               |
| Complete List of Authors:     | <p>Adu, Prince; BC Centre for Disease Control; The University of British Columbia, School of Population and Public Health</p> <p>Binka, Mawuena; BC Centre for Disease Control</p> <p>Mahmood, Bushra; The University of British Columbia, Department of Medicine</p> <p>Jeong, Dahn; BC Centre for Disease Control; The University of British Columbia, School of Population and Public Health</p> <p>Buller-Taylor, Terri; BC Centre for Disease Control</p> <p>Damascene, Makuza Jean; BC Centre for Disease Control; The University of British Columbia</p> <p>Iyaniwura, Sarafa; BC Centre for Disease Control; The University of British Columbia, Department of Mathematics</p> <p>Ringa, Notice; BC Centre for Disease Control; The University of British Columbia, School of Population and Public Health</p> <p>Velásquez García, Héctor A.; BC Centre for Disease Control; The University of British Columbia</p> <p>Wong, Stanley; BC Centre for Disease Control</p> <p>Yu, Amanda; BC Centre for Disease Control</p> <p>Bartlett, Sofia; BC Centre for Disease Control; The University of British Columbia, Department of Pathology and Laboratory Medicine</p> <p>Wilton, James; BC Centre for Disease Control</p> <p>Irvine, Mike A.; BC Centre for Disease Control; Simon Fraser University, Faculty of Health Sciences</p> <p>Otterstatter, Michael; BC Centre for Disease Control; University of British Columbia, School of Population and Public Health</p> <p>Janjua, Naveed ; BC Centre for Disease Control; The University of British Columbia</p> |
| Keywords:                     | COVID-19, PUBLIC HEALTH, Health & safety < HEALTH SERVICES ADMINISTRATION & MANAGEMENT, Epidemiology < INFECTIOUS DISEASES                                                                                                                                                                                                                                                                                                                                                                                                                                                                                                                                                                                                                                                                                                                                                                                                                                                                                                                                                                                                                                                                                                                                                                                                                                                                                                                                                                                                                                                |
|                               |                                                                                                                                                                                                                                                                                                                                                                                                                                                                                                                                                                                                                                                                                                                                                                                                                                                                                                                                                                                                                                                                                                                                                                                                                                                                                                                                                                                                                                                                                                                                                                           |

SCHOLARONE™  
Manuscripts

1  
2  
3  
4  
5  
6  
7  
8  
9  
10  
11  
12  
13  
14  
15  
16  
17  
18  
19  
20  
21  
22  
23  
24  
25  
26  
27  
28  
29  
30  
31  
32  
33  
34  
35  
36  
37  
38  
39  
40  
41  
42  
43  
44  
45  
46  
47  
48  
49  
50  
51  
52  
53  
54  
55  
56  
57  
58  
59  
60

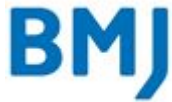

I, the Submitting Author has the right to grant and does grant on behalf of all authors of the Work (as defined in the below author licence), an exclusive licence and/or a non-exclusive licence for contributions from authors who are: i) UK Crown employees; ii) where BMJ has agreed a CC-BY licence shall apply, and/or iii) in accordance with the terms applicable for US Federal Government officers or employees acting as part of their official duties; on a worldwide, perpetual, irrevocable, royalty-free basis to BMJ Publishing Group Ltd ("BMJ") its licensees and where the relevant Journal is co-owned by BMJ to the co-owners of the Journal, to publish the Work in this journal and any other BMJ products and to exploit all rights, as set out in our [licence](#).

The Submitting Author accepts and understands that any supply made under these terms is made by BMJ to the Submitting Author unless you are acting as an employee on behalf of your employer or a postgraduate student of an affiliated institution which is paying any applicable article publishing charge ("APC") for Open Access articles. Where the Submitting Author wishes to make the Work available on an Open Access basis (and intends to pay the relevant APC), the terms of reuse of such Open Access shall be governed by a Creative Commons licence – details of these licences and which [Creative Commons](#) licence will apply to this Work are set out in our licence referred to above.

Other than as permitted in any relevant BMJ Author's Self Archiving Policies, I confirm this Work has not been accepted for publication elsewhere, is not being considered for publication elsewhere and does not duplicate material already published. I confirm all authors consent to publication of this Work and authorise the granting of this licence.

## Cohort profile: the British Columbia COVID-19 population mixing patterns survey (BC-Mix)

Prince A. Adu<sup>1,2</sup>, Mawuena Binka<sup>1</sup>, Bushra Mahmood,<sup>3</sup> Dahn Jeong<sup>1,2</sup>, Terri Buller-Taylor<sup>1</sup>, Makuza Jean Damascene<sup>1,2</sup>, Sarafa Iyaniwura<sup>1,4</sup>, Notice Ringa<sup>1,2</sup>, Héctor A. Velásquez García<sup>1,2</sup>, Stanley Wong<sup>1</sup>, Amanda Yu<sup>1</sup>, Sofia Bartlett<sup>1,6</sup>, James Wilton<sup>1</sup>, Mike A. Irvine<sup>1,7</sup>, Michael Otterstatter<sup>1,2</sup>, Naveed Z. Janjua<sup>1,2</sup>

<sup>1</sup>British Columbia Centre for Disease Control, Vancouver, British Columbia, Canada

<sup>2</sup>School of Population and Public Health, University of British Columbia, Vancouver, British Columbia, Canada

<sup>3</sup>Department of Medicine, University of British Columbia, Vancouver, British Columbia, Canada

<sup>4</sup>Department of Mathematics, University of British Columbia, Vancouver, British Columbia, Canada

<sup>5</sup>Faculty of Health Sciences, Simon Fraser University, Burnaby, British Columbia, Canada

<sup>6</sup>Department of Pathology and Laboratory Medicine, Vancouver, British Columbia, Canada

<sup>7</sup>Faculty of Health Sciences, Simon Fraser University, Burnaby, British Columbia, Canada

Corresponding author:

Naveed Zafar Janjua MBBS, MSc, DrPH

655 W 12th Ave, Vancouver, BC V5Z 4R4

[Naveed.janjua@bccdc.ca](mailto:Naveed.janjua@bccdc.ca)

## ABSTRACT

### Purpose

Several non-pharmaceutical interventions such as physical distancing, hand washing, self-isolation, and schools and business closures, were implemented in British Columbia (BC) following the first laboratory-confirmed case of coronavirus disease 2019 (COVID-19) on January 26, 2020, to minimize in-person contacts that could spread infections. The BC COVID-19 Population Mixing Patterns survey (BC-Mix) was established as a surveillance system to measure behaviour and contact patterns in BC over time to inform the timing of the easing/re-imposition of control measures. In this paper, we describe the BC-Mix survey design and the demographic characteristics of respondents.

### Participants

The ongoing repeated online survey was launched in September 2020. Participants are mainly recruited through social media platforms (including Instagram, Facebook, YouTube, WhatsApp). A follow up survey is sent to participants two to four weeks after completing the baseline survey. Survey responses are weighted to BC's population by age, sex, geography, and ethnicity to obtain generalizable estimates. Additional indices such as the material and social deprivation index, residential instability, economic dependency, and others are generated using census and location data.

### Findings to date

As of July 26, 2021, over 61,000 baseline survey responses were received of which 41,375 were eligible for analysis. Of the eligible participants, about 60% consented to follow up and about 27% provided their personal health numbers for linkage with healthcare databases. Approximately 50% of respondents were female, 39% were 55 years or older, 65% identified as white and 50% had at least a university degree.

### Future plans

Multiple papers describing contact patterns, physical distancing measures, regular handwashing and facemask wearing, modelling looking at impact of physical distancing measures and vaccine acceptance, hesitancy and uptake will soon be published.

## Strength and Limitations

- The sample size for this study is larger than comparable studies.
- Our methodology allows us to consider many auxiliary variables to enhance the representativeness of our sample to the general population.
- We employ an efficient and cost-effective recruitment strategy providing real time data
- Some population groups are underrepresented in the survey possibly due to lack of access to social media
- Our survey responses may be subject to recall bias since we ask respondents to recall contacts and other behaviours or activities from the previous day

## Introduction

The novel coronavirus disease 2019 (COVID-19), caused by the severe acute respiratory syndrome coronavirus 2 (SARS-CoV-2), has spread worldwide since December 2019. A global pandemic was declared by the World Health Organization in March 2020 and, as of July 2021, there have been over 200 million cases of COVID-19 infections and over 4.3 million resultant deaths globally (1). As vaccine rollouts continue at varying rates worldwide, physical distancing measures (2) remain among the most effective methods for COVID-19 prevention and control (3). Many governments have put in place physical distancing measures such as travel restrictions, closure of schools and workplaces, and the banning of large group gatherings to interrupt the transmission of SARS-CoV-2. These measures attempt to reduce contact between infected and healthy individuals in order to minimize disease spread and the impact on the healthcare system.

British Columbia (BC) is located on the West Coast of Canada and covers almost a million square kilometres. It has a diverse population of approximately 5.15 million as of July 1, 2020 (4). Public health officials in BC began urging the public to practice physical distancing and avoid any non-essential travel in early March 2020. By March 17, 2020, a public health emergency was declared in the province and various physical distancing measures were implemented (5). These included restriction of indoor and outdoor gatherings, closure of businesses that were unable to meet physical distancing measures, self-isolation requirements after travelling outside the country, and general physical distancing in all public space. While these measures were important for controlling the rapid spread of disease, they also had sweeping economic, social, and mental health impacts.

Assessing the impact of physical distancing measures on person-to-person contact can provide valuable information for refining control measures and help minimize both COVID-19-related disease burden and the related economic, social, and mental health impacts. Early detection of COVID-19 resurgences requires mechanisms for tracking precursors of transmission, including changes in social contacts, mixing patterns and physical distancing behaviours as well as early signals of a COVID-19 spread. Although methods such as

1  
2  
3 mathematical modelling can estimate the potential for resurgences, these methods often lack  
4 population-based empirical data on contact patterns, especially on the varying levels of contact  
5 patterns exhibited by different demographic groups in the population. These population-specific  
6 data could better inform mathematical models by incorporating explicit knowledge of contact  
7 patterns that are driving transmission rather than inferring these from reported cases and  
8 hospitalizations (6,6). Ultimately, they serve as an evidence-base to guide targeted measures that  
9 are amenable to actions by the government to ensure that the COVID-19 cases remain below the  
10 resurgence thresholds.  
11  
12  
13

14  
15 Various studies have assessed the impact of physical distancing measures imposed by  
16 governments on local contact patterns and behaviours during the COVID-19 pandemic in  
17 Belgium (7), Greece (8), Kenya (9), Luxembourg (10), the Netherlands (11), and the U.K (12).  
18 Such surveys can measure the public's compliance with the physical distancing measures and  
19 provide valuable information to inform other public health measures that may be necessary to  
20 avoid further waves of COVID-19 infections. In addition, the impact of physical distancing  
21 measures on mixing patterns and contact behaviours may vary across different age groups, and  
22 by individuals' primary place of activity such as schools or workplaces (8,13–15).  
23  
24  
25

26 Here, we describe the development the BC COVID-19 Population Mixing Patterns  
27 survey (BC-Mix), an ongoing online survey to monitor and assess social contact behaviours and  
28 mixing patterns in BC, Canada, during the COVID-19 pandemic. We detail the development of  
29 the survey and recruitment of respondents, as well as the characteristics of the participants.  
30  
31

32 Cohort description  
33

### 34 ***Survey design and methodology*** 35

36 The BC-Mix (<http://www.bccdc.ca/our-research/projects/bc-mix-covid-19-survey>) uses a cross-  
37 sectional survey design with longitudinal follow-up. Eligible population include residents of BC  
38 who are at least 18 years of age. The survey began on September 4, 2021, and as of August 2021  
39 is ongoing. Once a participant has completed the survey for the first time, they are invited for  
40 repeated follow-up. The first-time responses are referred to as the 'baseline'. Participants  
41 responding to the baseline survey are invited to complete the first follow-up survey after two  
42 weeks. Subsequent follow-up surveys are then sent in four-week intervals, following the  
43 completion of the previous survey.  
44  
45  
46

### 47 ***Participant recruitment*** 48

49 To capture participants from a broad demographic range, the survey invitation and survey are  
50 disseminated through Instagram, Facebook, YouTube, WhatsApp, Twitter, and Google search  
51 engine results pages. The Google Ads Audience manager and Facebook Ads manager allow for  
52 paid advertisements to be targeted at specific audiences. We use these tools to target the survey  
53 advertisement campaigns to only residents of BC who are 18 years and above. We also monitor  
54  
55  
56  
57



1  
2  
3 the demographic profile of survey participants and occasionally use these functions to target  
4 recruitment to age groups or sex that may be under-represented (16).  
5

6 To help capture underrepresented groups, we promote the survey to various ethnic populations.  
7 For instance, a South Asian community organization promotes the survey on their social media  
8 pages and also sends the survey to individuals on their mailing list. Although the survey is in  
9 English, it is also promoted in different languages (specifically, Korean and Farsi) to members of  
10 minority community groups in BC on their social media pages. Flyers are also distributed at  
11 grocery stores and restaurants particularly including those frequented by minority groups.  
12  
13  
14

### 15 *Participant and public involvement*

16  
17 The initial version of the BC-Mix survey was first piloted with a randomly selected sample of the  
18 BC population and feedback received was incorporated in the final version before the official  
19 launch. Methods of recruitment and priority of research questions were also informed by  
20 discussions with members of the public and with a community group. We also receive input from  
21 survey participants on an ongoing basis through a dedicated e-mail address. We plan to create  
22 dashboards and other infographics of the study results on the study website. A newsletter suitable  
23 for non-specialist audience will also be sent to participants.  
24  
25  
26

### 27 *Survey domain and case definitions*

28  
29 The BC-Mix survey instrument was adapted from the POLYMOD study (14) and the Berkeley  
30 Interpersonal Contact Study [BICS] (17) and was administered through Qualtrics (18), an online  
31 survey tool. The baseline survey comprises 94 questions across six key domains:  
32

- 33 1. **Demographic information:** This domain includes age, sex, gender, ethnicity, education,  
34 employment, household characteristics, and postal code.
- 35 2. **COVID-19 testing and results, symptoms, and health behaviours:** This domain captures  
36 COVID-19 testing information, symptoms, and behaviours such as doctor visits following  
37 symptoms.  
38
- 39 3. **Activities and behaviour in and outside of the home:** This domain captures social contact  
40 and mixing behaviours such as number of contacts, location, and duration of contact during  
41 the past 24 hours. Other questions in this domain include age and sex of contact, and  
42 relationship of respondent to the contact persons, physical distancing behaviour (e.g.,  
43 handwashing) and personal protective equipment use. Initially, respondents were asked to  
44 provide this information for up to three of their reported contacts. We began collecting data  
45 for up to 10 contacts from December 11, 2020. Also from December 11, 2020, we began  
46 collecting general information about greater than 10 contacts i.e., if a participant reports more  
47 than 10 contacts per day, they are asked general questions about these contacts for e.g., age  
48 group, duration, and location of the majority of those contacts. If majority of contacts took  
49 place at a workplace setting, a follow up question asks respondents to report the type of work  
50 setting where the contacts occurred.  
51  
52  
53  
54  
55  
56  
57

- 1
- 2
- 3
- 4 **4. Internet and social media use:** This domain captures information on internet and social
- 5 media use in terms of most frequently used platform and frequency of use.
- 6
- 7 **5. Perceptions and attitudes around COVID-19:** This domain measures the respondent's
- 8 perception of the physical distancing measures, and their self-confidence or ability to carry
- 9 out them.
- 10
- 11 **6. COVID-19 vaccine acceptance sub-questionnaire:** This sub-questionnaire was added on
- 12 March 8, 2021. Items from this domain were developed using a vaccine acceptance
- 13 behavioral framework, which synthesizes constructs from the Theory of Reasoned Action
- 14 (TRA)(19), Theory of Planned Behavior (TPB)(20,21) and the Health Belief Model (HBM)
- 15 (22), to understand and predict the uptake of COVID-19 vaccine. According to the TRA, the
- 16 best single predictor of behaviour is an individual's intention (23). Intentions, in turn, are an
- 17 outcome of the individual's attitude toward performing the behavior in question, and/or the
- 18 individual's perceptions of support from family and friends (subjective norms) for engaging
- 19 in the behavior (24). Perceived control or self-efficacy, the confidence that one has the ability
- 20 to perform the intended behavior (25), is another important construct taken from TPB. The
- 21 TPB assumes that an individual's perception of whether they can successfully engage in a
- 22 particular behavior often has a direct effect on their intentions, such as getting a vaccine (26).
- 23 The widely-used HBM, has previously been used to evaluate beliefs and attitudes toward
- 24 seasonal influenza and pandemic swine flu vaccines as well as the COVID-19 vaccine (27–
- 25 29). Relevant constructs from HBM were applied to develop questionnaire items to assess
- 26 perceived threat of contracting the COVID-19, perceived severity of disease if infected and
- 27 belief in the safety and effectiveness of getting the vaccine. Overall, this sub-questionnaire is
- 28 meant to provide an understanding of some of the individual level health beliefs, perceptions
- 29 and attitudes that may influence vaccine uptake. The vaccine acceptance sub-questionnaire
- 30 has the following the domains: *Attitude (perceived susceptibility, severity, benefits and*
- 31 *barriers)*, *Descriptive and Subjective Norms*, *Perceived Control and Intention*.
- 32
- 33
- 34
- 35
- 36
- 37

38 Location data is used to generate other indicators at the area level. For example, the Quebec  
39 Material and Social Deprivation combines six indicators related to health and welfare that  
40 represent material or social deprivation based on Canadian Census data, including 1) proportion  
41 of persons without high school diploma 2) ratio of employment to population 3) average income  
42 4) proportion of persons separated, divorced, widowed 5) proportion of single-parent families  
43 and 6) proportion of people living alone (30).

44  
45  
46  
47 A full list of key variables in the survey and definitions is presented in S1 Table in the  
48 Supplementary file.

#### 49 ***Analysis, data cleaning and weighting***

50  
51  
52 A survey completion rate of at least 33% of questions, valid non-missing responses for the sex  
53 and age questions are required for inclusion for weighting the survey data and further analysis.  
54 All duplicates are removed.

To ensure that the BC-Mix sample is representative of the BC population, survey data are weighted to obtain generalizable estimates (Table 1). Using the 2016 Census data (31), the survey is weighted with the following auxiliary variables: age, sex, geography, and ethnicity using the weighting adjustment technique (32) in the following hierarchy: As our first criterion, we consider age, sex, geography and ethnicity as our auxiliary variables. If a record has valid responses for all these variables except the ethnicity variable, then the survey weight is generated using only age, sex, and geography (second criterion). If a record does not meet the first and second criteria, then we apply the third criterion which uses age, sex, and ethnicity as the auxiliary variables. Finally, we use only age and sex as auxiliary variables if a record does not satisfy the first three criteria.

Survey weights are estimated separately for baseline and for each follow-up. To assess participant profile, we computed un-weighted and weighted frequency and percentages of key demographic variables using SAS Software version 9.4. Baseline survey data was used to provide the survey participant profile and in comparison, with BC population profile (Table 1). To assess potential systematic differences between eligible and ineligible responses, a comparison of the baseline eligible participants versus ineligible participants is presented the S2 Table in the Supplementary file. Participant profile of follow up surveys is also presented in S3 Table in the Supplementary file.

### ***Ethics and dissemination***

Informed consent was sought on the survey start page. The study was reviewed and approved by the University of British Columbia Behavioral Research Ethics Board (No: H20-01785). Multiple papers describing contact patterns, physical distancing measures, regular handwashing and facemask wearing, modelling looking at impact of physical distancing measures and vaccination levels, vaccine acceptance, hesitancy, and uptake will soon be published.

### ***Preliminary results***

As of July 26, 2021, there were 61,183 respondents who participated in the baseline survey of which 41,375 were eligible for analysis. There were 15,194 (eligible=10,993) participants in the first follow-up survey, 11,343 (eligible n=8,164) in the second, 8,521 (eligible n=6,375) in the third, 6,487 (eligible n=4,981) in the fourth, 5,014 (eligible=3,891) in the fifth, 4,094 (eligible=3,184) in the sixth, 3,125 (eligible n= 2,417) in the seventh and 2,317 (eligible n=1,760) participants in the eighth follow-up survey (Figure 1).

Considering the baseline sample (Table 1), there were approximately equal number of male and female (weighted % of female =50.0%). Majority of participants were 55 years or older (weighted %= 39.4%), self identified as White (weighted %= 64.6%), had at least a university degree (weighted %= 50.0%) and lived in the Fraser Health region (weighted %= 36.2%).

1  
2  
3 Almost 63.8% (unweighted n=20,633) consented to a follow-up after the baseline survey and at  
4 least 94.2% (unweighted n=10,357) consented to receiving subsequent follow-up surveys (Table  
5 1 and S3 Table in the Supplementary File). Approximately 27.3% (unweighted n=7,290) of  
6 respondents in the baseline provided their personal health numbers for linkage with other  
7 healthcare utilization databases.  
8  
9

10  
11 After weighting, the baseline survey sample is representative of the general BC population in  
12 terms of age, sex, health region, and ethnicity (Table 1). The distribution of the eligible  
13 participants was also similar to the distribution of ineligible participants in terms of sex, age,  
14 race/ethnicity and geography/health region (S2 Table in the Supplementary file).  
15  
16

### 17 **Findings to date**

18  
19 Following the identification of COVID-19 cases in BC, several interventions including physical  
20 distancing measures were implemented to limit the spread of COVID-19 in the province.  
21 Subsequently, the BC-Mix was developed by the BC Centre for Disease Control (BCCDC)(33)  
22 as part of an early warning system for monitoring social and physical interactions between  
23 individuals of different age-groups and demography, and to help predict when COVID-19  
24 transmission might further increase. This paper describes BC-Mix survey methods and the  
25 profile of survey respondents.  
26  
27

28  
29 Recent studies similar to the BC-Mix have assessed social contact patterns relevant to the spread  
30 and control of COVID-19 in different countries(7–12,34,35) many of which have adapted  
31 features of the POLYMOD project (14). The 2020 Belgian CoMix survey (7) is an online  
32 longitudinal survey that closely monitors changes in social mixing behaviours among a sample  
33 of Belgian adults (aged 18 years and above). The U.K CoMix survey assesses contact patterns of  
34 a representative sample of U.K adults. Launched on March 24, 2020, participants are followed  
35 up every 2 weeks to monitor changes in their self reported behaviours (12). In Canada, the  
36 Quebec-based CONNECT study uses population-based survey to assess social contacts and  
37 mixing patterns (34). Brankston and colleagues (35) also used paid panel representative of  
38 Canadian adults to construct contact patterns to determine the impact of physical distancing  
39 measures on COVID-19 transmission. Most of these studies commissioned market research  
40 companies or used survey panels to recruit participants (7,12,17,35). While market companies or  
41 survey panels offer a convenient approach to sampling, they have some challenges. Panels are  
42 made of membership in loyalty programs or other panels constituting a select group of  
43 population and may therefore not represent complete random recruitment from a population of  
44 interest.  
45  
46  
47  
48  
49

50  
51 The use of targeted social media advertisement for participant recruitment has gained  
52 prominence in health research (16,36), having been applied in areas such as mental health (37),  
53 cannabis use (38), smoking behaviour (39) and in other health related studies (40). For our  
54 survey, we use social media advertisement and other recruitment strategies. Although social  
55 media-based recruitment does not necessarily generate a random sample of the general  
56  
57

1  
2  
3 population given the characteristics of people who are on social media may differ from those  
4 who are not, social media channels like Facebook, Instagram, Twitter, and others have powerful  
5 targeting capabilities that allow researchers to target advertisements to users with specific  
6 demographic characteristics. They also have the advantage of reaching hard-to-reach populations  
7 (37–39).  
8  
9

10  
11 Quota sampling has been used by other studies to achieve representativeness (7,44). We used  
12 two approaches to achieve the same goal: adaptive recruitment through promotion and targeting  
13 to specific populations and then post hoc weighting. Our survey tool does not set quotas on  
14 recruitment but uses targeted advertisements to improve representativeness.  
15  
16

### 17 *Strengths and limitations*

18  
19 The following issues should be considered for interpretation of results from BC-Mix. Some  
20 population groups are underrepresented in the survey possibly due to lack of access to social  
21 media. These are people who are economically marginalised and less likely to have access to a  
22 computer/electronic device or to have access to the internet/cellular data, e.g., people living in  
23 poverty, people who are unemployed, people who are unhoused, etc. Also, people who are in  
24 prison (sentenced or on remand) or people who are under immigration detention may not have  
25 access to the internet or cellular devices. Our survey responses may be subject to recall bias since  
26 we ask respondents to recall contacts and other behaviours or activities from the previous day.  
27 Other studies have used diaries (14) to overcome this weakness but this may be logistically  
28 challenging and attrition with this method may be quite high. Another potential bias inherent in  
29 our survey is the issue of reporting bias, as respondents may respond in ways consistent with the  
30 laws around physical distancing. In addition, the BC-Mix is available only in English, thus  
31 excluding individuals who cannot communicate in English. This notwithstanding, according to  
32 the 2016 Census, 96.6% of BC's population indicated that they can converse in English (31).  
33 Therefore, we do not believe that any bias associated with language would be significant.  
34 Another limitation to mention is the large number of recruits that were ineligible and the attrition  
35 between successive rounds of survey. This could be related to survey fatigue, or the time  
36 required to complete the survey.  
37  
38

39  
40 Our survey has several strengths. Web-based surveys like the BC-Mix provide timely  
41 information for pandemic response (45). Also, during an infectious disease pandemic, web-based  
42 surveys offer a more convenient approach to data collection compared to in-person or other  
43 modes of data collection. We also found paid advertisements to be more cost effective compared  
44 to the cost of panel data from survey companies (36). An additional strength of our study is its  
45 large sample size. Our total recruited sample of over 61,000 participants compares to the 1,356  
46 participants in the U.K. CoMix study (12), the 9,743 participants in the BICS study (17) study,  
47 1,542 participants in the Belgian CoMix study (7) and the 7,290 participants in the POLYMOD  
48 study (14). In addition, because we opted to achieve representativeness post-data collection (at  
49 the analysis stage), we were able to consider many important variables besides age and sex in our  
50  
51  
52  
53  
54  
55  
56  
57



weighting strategy. It would have been logistically challenging to consider all these variables had we used quota-sampling given that many market research company panels were limited in terms recruitment by age, sex, and geography. Using many auxiliary variables in our weighting strategy increased the representativeness of the BC population.

### **Collaboration**

The BC-Mix will continue to collect relevant data on behaviour and contact patterns in BC to reflect the changing dynamics of the COVID-19 pandemic. The BC-Mix has an overarching governance structure. We welcome further collaboration from interested researchers. Data requests should be sent to the Principal Investigator, Dr. Naveed Z. Janjua (corresponding author).

### **Conclusion**

To our knowledge, the BC-Mix is the first and largest surveillance tool providing real time quantitative data on mixing patterns and contact characteristics in BC and one of the largest in North America. Tools such as the BC-Mix are integral to the COVID-19 pandemic response to provide critical data to inform the timing of loosening or re-imposition of physical distancing measures. Further analyses on contact patterns, relationship of contact patterns with transmission, disparities in contact patterns, facemask use, are in progress and will be published soon.

### **Supporting information**

S1 Table. BC-Mix variable names and definitions

S2 Table. Comparison of baseline eligible and ineligible participants, frequencies, and proportions

S3 Table. Participant profile of BC-Mix follow up surveys: frequencies and proportions (%)

### **Authors' contributions**

**Conceptualization:** Naveed Z. Janjua, Prince A. Adu

**Survey design:** Naveed Z. Janjua, Prince A. Adu, Terri Buller-Taylor, Bushra Mahmood

**Data curation:** Prince A. Adu, Amanda Yu, Stanley Wong

**Statistical analysis:** Prince A. Adu

**Funding acquisition:** Naveed Janjua

**Methodology:** Naveed Z. Janjua, Prince A. Adu, Mawuena Binka, Terri Buller-Taylor, Bushra Mahmood, Sarafa Iyaniwura, Michael Otterstatter

**Writing first draft:** Prince A. Adu, Dahn Jeong, Mawuena Binka, Terri Buller-Taylor, Sarafa Iyaniwura, Notice Ringa

**Writing-review & editing:** Naveed Z. Janjua, Héctor A. Velásquez García, Bushra Mahmood, Makuza Jean Damascene, Mawuena Binka, James Wilton, Sofia Bartlett, Michael Otterstatter, Mike Irvine.

## Acknowledgement

The authors would like to express their gratitude to Dr Joan Hu, Department of Statistics and Actuarial Science, Simon Fraser University and Mei Chong of BC Centre for Disease Control for their methodological guidance. We are also grateful to all residents of British Columbia who participated in the British Columbia COVID-19 Population Mixing Patterns (BC-Mix) survey.

## Funding statement

This work was supported by Michael Smith Foundation for Health Research COVID-19 Research Response Fund (Award #: COV-2020-1183)

## Competing interests statement

None declared

## References

1. Johns Hopkins Coronavirus Resource Center. COVID-19 Map [Internet]. Johns Hopkins Coronavirus Resource Center. [cited 2021 May 23]. Available from: <https://coronavirus.jhu.edu/map.html>
2. Lu H, Stratton CW, Tang Y. Outbreak of pneumonia of unknown etiology in Wuhan, China: The mystery and the miracle. *J Med Virol*. 2020 Apr;92(4):401–2.
3. Islam N, Sharp SJ, Chowell G, Shabnam S, Kawachi I, Lacey B, et al. Physical distancing interventions and incidence of coronavirus disease 2019: natural experiment in 149 countries. *BMJ*. 2020 Jul 15;370:m2743.
4. BC Stats. 2020 Sub-Provincial Population Estimates Highlights. 2020 Jul;4.
5. Joint statement on Province of B.C.'s COVID-19 response, latest updates |BC Gov News [Internet]. 2020 [cited 2021 May 23]. Available from: <https://news.gov.bc.ca/releases/2020HLTH0089-000505>
6. Ferguson N, Laydon DJ, Nedjati Gilani G, Imai N, Ainslie KM, Baguelin M, et al. Report 9: Impact of non-pharmaceutical interventions (NPIs) to reduce COVID19 mortality and healthcare demand. 2020 Jan 1 [cited 2021 Jul 19]; Available from: <https://www.scienceopen.com/document?vid=4e6290c9-0ded-40ed-b858-ba18119863c0>
7. Coletti P, Wambua J, Gimma A, Willem L, Vercruyssen S, Vanhoutte B, et al. CoMix: comparing mixing patterns in the Belgian population during and after lockdown. *Sci Rep*. 2020 Dec 14;10(1):21885.
8. Sypsa V, Roussos S, Paraskevis D, Lytras T, Tsiodras S, Hatzakis A. Effects of Social Distancing Measures during the First Epidemic Wave of Severe Acute Respiratory Syndrome Infection, Greece. *Emerg Infect Dis*. 2021 Feb;27(2):452–62.

- 1  
2  
3 9. Quaife M, van Zandvoort K, Gimma A, Shah K, McCreesh N, Prem K, et al. The impact of  
4 COVID-19 control measures on social contacts and transmission in Kenyan informal  
5 settlements. *BMC Med*. 2020 Oct 5;18(1):316.  
6
- 7  
8 10. Latsuzbaia A, Herold M, Bertemes J-P, Mossong J. Evolving social contact patterns during  
9 the COVID-19 crisis in Luxembourg. *PLOS ONE*. 2020 Aug 6;15(8):e0237128.  
10
- 11 11. Backer JA, Mollema L, Vos RAE, Klinkenberg D, Klis FRM van der, Melker HE de, et al.  
12 The impact of physical distancing measures against COVID-19 transmission on contacts  
13 and mixing patterns in the Netherlands: repeated cross-sectional surveys in 2016/2017,  
14 April 2020 and June 2020. *medRxiv*. 2020 Oct 16;2020.05.18.20101501.  
15
- 16 12. Jarvis CI, Van Zandvoort K, Gimma A, Prem K, Auzenbergs M, O'Reilly K, et al.  
17 Quantifying the impact of physical distance measures on the transmission of COVID-19 in  
18 the UK. *BMC Med*. 2020 May 7;18(1):124.  
19
- 20 13. Davies NG, Klepac P, Liu Y, Prem K, Jit M, Eggo RM. Age-dependent effects in the  
21 transmission and control of COVID-19 epidemics. *Nat Med*. 2020 Aug;26(8):1205–11.  
22
- 23 14. Mossong J, Hens N, Jit M, Beutels P, Auranen K, Mikolajczyk R, et al. Social Contacts and  
24 Mixing Patterns Relevant to the Spread of Infectious Diseases. *PLOS Med*. 2008 Mar  
25 25;5(3):e74.  
26
- 27 15. Wallinga J, Teunis P, Kretzschmar M. Using data on social contacts to estimate age-  
28 specific transmission parameters for respiratory-spread infectious agents. *Am J Epidemiol*.  
29 2006 Nov 15;164(10):936–44.  
30
- 31 16. Grow A, Perrotta D, Fava ED, Cimentada J, Rampazzo F, Gil-Clavel S, et al. Addressing  
32 Public Health Emergencies via Facebook Surveys: Advantages, Challenges, and Practical  
33 Considerations. *J Med Internet Res*. 2020 Dec 14;22(12):e20653.  
34
- 35 17. Feehan DM, Mahmud AS. Quantifying population contact patterns in the United States  
36 during the COVID-19 pandemic. *Nat Commun*. 2021 Feb 9;12(1):893.  
37
- 38 18. Qualtrics. Qualtrics [Internet]. Provo, Utah, USA: Qualtrics; 2021. Available from:  
39 <https://www.qualtrics.com>  
40
- 41 19. Ajzen I, Fishbein M. Understanding attitudes and predicting social behavior Prentice-Hall  
42 Inc. Englewood Cliffs, NJ; 1980.  
43
- 44 20. Ajzen I. From Intentions to Actions: A Theory of Planned Behavior. In: Kuhl J, Beckmann  
45 J, editors. *Action Control: From Cognition to Behavior* [Internet]. Berlin, Heidelberg:  
46 Springer; 1985 [cited 2021 Jun 15]. p. 11–39. (SSSP Springer Series in Social Psychology).  
47 Available from: [https://doi.org/10.1007/978-3-642-69746-3\\_2](https://doi.org/10.1007/978-3-642-69746-3_2)  
48
- 49 21. Ajzen I. The theory of planned behavior. *Organ Behav Hum Decis Process*. 1991 Dec  
50 1;50(2):179–211.  
51  
52  
53  
54  
55  
56  
57



- 1  
2  
3 22. Becker MH. The health belief model and personal health behavior. *Health Educ Monogr.* 1974;2:324–473.  
4  
5  
6  
7 23. Fishbein M, Ajzen I. *Belief, Attitude, Intention, and Behavior: An Introduction to Theory and Research.* Reading, MA: Addison-Wesley; 1975.  
8  
9  
10 24. Sheppard BH, Hartwick J, Warshaw PR. The Theory of Reasoned Action: A Meta-Analysis  
11 of Past Research with Recommendations for Modifications and Future Research. *J Consum*  
12 *Res.* 1988 Dec 1;15(3):325–43.  
13  
14 25. Bogoch II, Watts A, Thomas-Bachli A, Huber C, Kraemer MUG, Khan K. Pneumonia of  
15 unknown aetiology in Wuhan, China: potential for international spread via commercial air  
16 travel. *J Travel Med.* 2020 Mar 13;27(2).  
17  
18 26. Fisher WA, Kohut T, Salisbury CMA, Salvadori MI. Understanding human papillomavirus  
19 vaccination intentions: comparative utility of the theory of reasoned action and the theory  
20 of planned behavior in vaccine target age women and men. *J Sex Med.* 2013  
21 Oct;10(10):2455–64.  
22  
23 27. Santos AJ, Kislaya I, Machado A, Nunes B. Beliefs and attitudes towards the influenza  
24 vaccine in high-risk individuals. *Epidemiol Infect.* 2017 Jul;145(9):1786–96.  
25  
26 28. Teitler-Regev S, Shahrabani S, Benzion U. Factors Affecting Intention among Students to  
27 Be Vaccinated against A/H1N1 Influenza: A Health Belief Model Approach. *Adv Prev*  
28 *Med.* 2011 Dec 20;2011:e353207.  
29  
30 29. Wong MCS, Wong ELY, Huang J, Cheung AWL, Law K, Chong MKC, et al. Acceptance  
31 of the COVID-19 vaccine based on the health belief model: A population-based survey in  
32 Hong Kong. *Vaccine.* 2021 Feb 12;39(7):1148–56.  
33  
34 30. Bureau d'information et d'études En Santé Des Populations (BIESP). Deprivation Index  
35 [Internet]. INSPQ. 2019 [cited 2021 May 27]. Available from:  
36 <https://www.inspq.qc.ca/en/deprivation/material-and-social-deprivation-index>  
37  
38 31. Government of Canada SC. Census Profile, 2016 Census - British Columbia [Province] and  
39 Canada [Country] [Internet]. 2017 [cited 2021 Jul 25]. Available from:  
40 [https://www12.statcan.gc.ca/census-recensement/2016/dp-  
43 pd/prof/details/page.cfm?Lang=E&Geo1=PR&Code1=59&Geo2=PR&Code2=01&Search  
44 Text=Canada&SearchType=Begins&SearchPR=01&B1=All&type=0](https://www12.statcan.gc.ca/census-recensement/2016/dp-<br/>41 pd/prof/details/page.cfm?Lang=E&Geo1=PR&Code1=59&Geo2=PR&Code2=01&Search<br/>42 Text=Canada&SearchType=Begins&SearchPR=01&B1=All&type=0)  
45  
46 32. Bethlehem JG. *Applied survey methods: a statistical perspective.* Hoboken, N.J: Wiley;  
47 2009. 375 p. (Wiley series in survey methodology).  
48  
49 33. BC Centre for Disease Control. What We Do [Internet]. [cited 2021 Jun 10]. Available  
50 from: <http://www.bccdc.ca/about/what-we-do>  
51  
52  
53  
54  
55  
56  
57

- 1  
2  
3 34. Institut national de, santé publique du Québec. CONNECT : étude des contacts sociaux des  
4 Québécois - 27 avril 2021 [Internet]. INSPQ. [cited 2021 Jun 17]. Available from:  
5 <https://www.inspq.qc.ca/covid-19/donnees/connect/27-avril-2021>  
6  
7
- 8 35. Brankston G, Merkley E, Fisman DN, Tuite AR, Poljak Z, Loewen PJ, et al. Quantifying  
9 Contact Patterns in Response to COVID-19 Public Health Measures in Canada. medRxiv.  
10 2021 Mar 12;2021.03.11.21253301.  
11
- 12 36. Thornton L, Batterham PJ, Fassnacht DB, Kay-Lambkin F, Calear AL, Hunt S. Recruiting  
13 for health, medical or psychosocial research using Facebook: Systematic review. *Internet*  
14 *Interv*. 2016 May 1;4:72–81.  
15
- 16 37. Choi I, Milne DN, Glozier N, Peters D, Harvey SB, Calvo RA. Using different Facebook  
17 advertisements to recruit men for an online mental health study: Engagement and selection  
18 bias. *Internet Interv*. 2017 Jun 1;8:27–34.  
19
- 20 38. Borodovsky JT, Marsch LA, Budney AJ. Studying Cannabis Use Behaviors With Facebook  
21 and Web Surveys: Methods and Insights. *JMIR Public Health Surveill*. 2018 May  
22 2;4(2):e9408.  
23
- 24 39. Ramo DE, Prochaska JJ. Broad Reach and Targeted Recruitment Using Facebook for an  
25 Online Survey of Young Adult Substance Use. *J Med Internet Res*. 2012 Feb  
26 23;14(1):e1878.  
27
- 28 40. Fazzino TL, Rose GL, Pollack SM, Helzer JE. Recruiting U.S. and Canadian College  
29 Students via Social Media for Participation in a Web-Based Brief Intervention Study. *J Stud*  
30 *Alcohol Drugs*. 2015 Jan 1;76(1):127–32.  
31
- 32 41. Guillory J, Kim A, Murphy J, Bradfield B, Nonnemaker J, Hsieh Y. Comparing Twitter and  
33 Online Panels for Survey Recruitment of E-Cigarette Users and Smokers. *J Med Internet*  
34 *Res* [Internet]. 2016 Nov 15 [cited 2021 Jun 16];18(11). Available from:  
35 <https://www.ncbi.nlm.nih.gov/pmc/articles/PMC5128722/>  
36  
37
- 38 42. Walsh DC, Rudd RE, Moeykens BA, Moloney TW. Social marketing for public health.  
39 *Health Aff Proj Hope*. 1993;12(2):104–19.  
40
- 41 43. Freimuth VS, Mettger W. Is there a hard-to-reach audience? *Public Health Rep Wash DC*  
42 1974. 1990 Jun;105(3):232–8.  
43
- 44 44. Leung K, Jit M, Lau EHY, Wu JT. Social contact patterns relevant to the spread of  
45 respiratory infectious diseases in Hong Kong. *Sci Rep*. 2017 Aug 11;7(1):7974.  
46
- 47 45. Hlatshwako TG, Shah SJ, Kosana P, Adebayo E, Hendriks J, Larsson EC, et al. Online  
48 health survey research during COVID-19. *Lancet Digit Health*. 2021 Feb 1;3(2):e76–7.  
49  
50  
51  
52  
53  
54  
55  
56  
57

**Table 1.** Participant profile of BC-Mix baseline data (n=41,375), September 04, 2020-July 26, 2021

|                          |                                            | Survey                |                               |                    |            | British Columbia population |              |
|--------------------------|--------------------------------------------|-----------------------|-------------------------------|--------------------|------------|-----------------------------|--------------|
|                          |                                            | Un-weighted frequency | Un-weighted % (excl. missing) | Weighted frequency | Weighted % | Population frequency        | Population % |
| <b>Sex</b>               |                                            |                       |                               |                    |            |                             |              |
|                          | Male                                       | 6,823                 | 16.5                          | 21,293             | 50.0       | 1,805,105                   | 48.5         |
|                          | Female                                     | 34,552                | 83.5                          | 21,261             | 50.0       | 1,914,755                   | 51.5         |
|                          | Missing                                    |                       |                               |                    |            |                             |              |
| <b>Age</b>               |                                            |                       |                               |                    |            |                             |              |
|                          | 18-34                                      | 4,978                 | 12.0                          | 11,575             | 27.2       | 1,002,745                   | 27           |
|                          | 35-54                                      | 12,110                | 29.3                          | 14,194             | 33.4       | 1,251,835                   | 33.7         |
|                          | 55+                                        | 24,287                | 58.7                          | 16,784             | 39.4       | 1,465,280                   | 39.4         |
| <b>Race/ethnicity</b>    |                                            |                       |                               |                    |            |                             |              |
|                          | Indigenous                                 | 1,757                 | 4.4                           | 2,180              | 5.3        | 186,705                     | 5            |
|                          | Chinese                                    | 882                   | 2.2                           | 4,451              | 10.9       | 418,035                     | 11.2         |
|                          | White                                      | 35,026                | 87.5                          | 26,383             | 64.6       | 2,448,155                   | 65.8         |
|                          | South Asian                                | 606                   | 1.5                           | 3,473              | 8.5        | 280,470                     | 7.5          |
|                          | Other                                      | 1,766                 | 4.4                           | 4,352              | 10.7       | 386,495                     | 10.4         |
|                          | Missing/Unknown                            | 1,338                 | n/a                           | 1715               | n/a        | n/a                         | n/a          |
| <b>Health region</b>     |                                            |                       |                               |                    |            |                             |              |
|                          | Fraser Health                              | 8,451                 | 26.1                          | 11,793             | 36.2       | 1,347,410                   | 36.2         |
|                          | Interior Health                            | 6,143                 | 19.0                          | 5,336              | 16.4       | 595,105                     | 16           |
|                          | Northern Island                            | 1,825                 | 5.6                           | 1,828              | 5.6        | 213,235                     | 5.7          |
|                          | Vancouver Coastal                          | 7,315                 | 22.6                          | 8,118              | 24.9       | 934,055                     | 25.1         |
|                          | Vancouver Island                           | 8,640                 | 26.7                          | 5,535              | 17.0       | 630,055                     | 16.9         |
|                          | Missing/Unknown                            | 9,001                 | n/a                           | 9,943              | n/a        | n/a                         | n/a          |
| <b>Education</b>         |                                            |                       |                               |                    |            |                             |              |
|                          | Below high school                          | 807                   | 2.5                           | 1,096              | 3.0        | 2,301,030                   | 12.5         |
|                          | Below bachelor                             | 16,928                | 51.7                          | 15,176             | 47.0       | 466,295                     | 61.9         |
|                          | University degree                          | 15,029                | 45.9                          | 16,273             | 50.0       | 952,535                     | 25.6         |
|                          | Missing/Unknown                            | 8,611                 | n/a                           | 10,009             | n/a        | n/a                         | n/a          |
| <b>Employment status</b> |                                            |                       |                               |                    |            |                             |              |
|                          | Employed full-time (30 hours or more/week) | 10,654                | 32.0                          | 13,608             | 40.8       | n/a                         | n/a          |
|                          | Employed part-time                         | 2,993                 | 9.0                           | 3,131              | 9.4        | n/a                         | n/a          |

|                            |                                      | Survey                |                               |                    |            | British Columbia population |              |
|----------------------------|--------------------------------------|-----------------------|-------------------------------|--------------------|------------|-----------------------------|--------------|
|                            |                                      | Un-weighted frequency | Un-weighted % (excl. missing) | Weighted frequency | Weighted % | Population frequency        | Population % |
|                            | Self-employed                        | 2,704                 | 8.1                           | 3,013              | 9.0        | n/a                         | n/a          |
|                            | Unemployed but looking for a job     | 952                   | 2.9                           | 1,522              | 4.6        | n/a                         | n/a          |
|                            | Unemployed and not looking for a job | 406                   | 1.2                           | 510                | 1.5        | n/a                         | n/a          |
|                            | Full-time parent, homemaker          | 879                   | 2.6                           | 740                | 2.2        | n/a                         | n/a          |
|                            | Retired                              | 12,757                | 38.3                          | 8,096              | 24.3       | n/a                         | n/a          |
|                            | Student/Pupil                        | 566                   | 1.7                           | 1,197              | 3.6        | n/a                         | n/a          |
|                            | Long-term sick or disabled           | 968                   | 2.9                           | 914                | 2.7        | n/a                         | n/a          |
|                            | Prefer not to answer                 | 424                   | 1.3                           | 619                | 1.9        | n/a                         | n/a          |
|                            | Missing/Unknown                      | 8,072                 | n/a                           | n/a                | n/a        | n/a                         | n/a          |
| Material Deprivation Index |                                      |                       |                               |                    |            |                             |              |
|                            | 1 (Privileged)                       | 6,407                 | 22.3                          | 6,100              | 21.8       | n/a                         | n/a          |
|                            | 2                                    | 6,475                 | 22.5                          | 5,873              | 21.1       | n/a                         | n/a          |
|                            | 3                                    | 6,972                 | 24.2                          | 6,010              | 21.6       | n/a                         | n/a          |
|                            | 4                                    | 4,822                 | 16.8                          | 5,187              | 18.7       | n/a                         | n/a          |
|                            | 5 (Deprived)                         | 4,085                 | 14.2                          | 4,656              | 16.8       | n/a                         | n/a          |
|                            | Missing                              | 1,2614                | n/a                           | n/a                | n/a        | n/a                         | n/a          |
| Follow up consent          |                                      |                       |                               |                    |            |                             |              |
|                            | Yes                                  | 20,633                | 63.8                          | 19,051             | 58.9       | n/a                         | n/a          |
|                            | No                                   | 11,689                | 36.2                          | 13,275             | 41.1       | n/a                         | n/a          |
|                            | Missing                              | 9,053                 | n/a                           | n/a                | n/a        | n/a                         | n/a          |
| Data linkage consent       |                                      |                       |                               |                    |            |                             |              |
|                            | Yes                                  | 7,290                 | 27.3                          | 7,318              | 26.4       | n/a                         | n/a          |
|                            | No                                   | 19,467                | 72.8                          | 20,362             | 73.6       | n/a                         | n/a          |
|                            | Missing                              | 14,618                | n/a                           | n/a                | n/a        | n/a                         | n/a          |

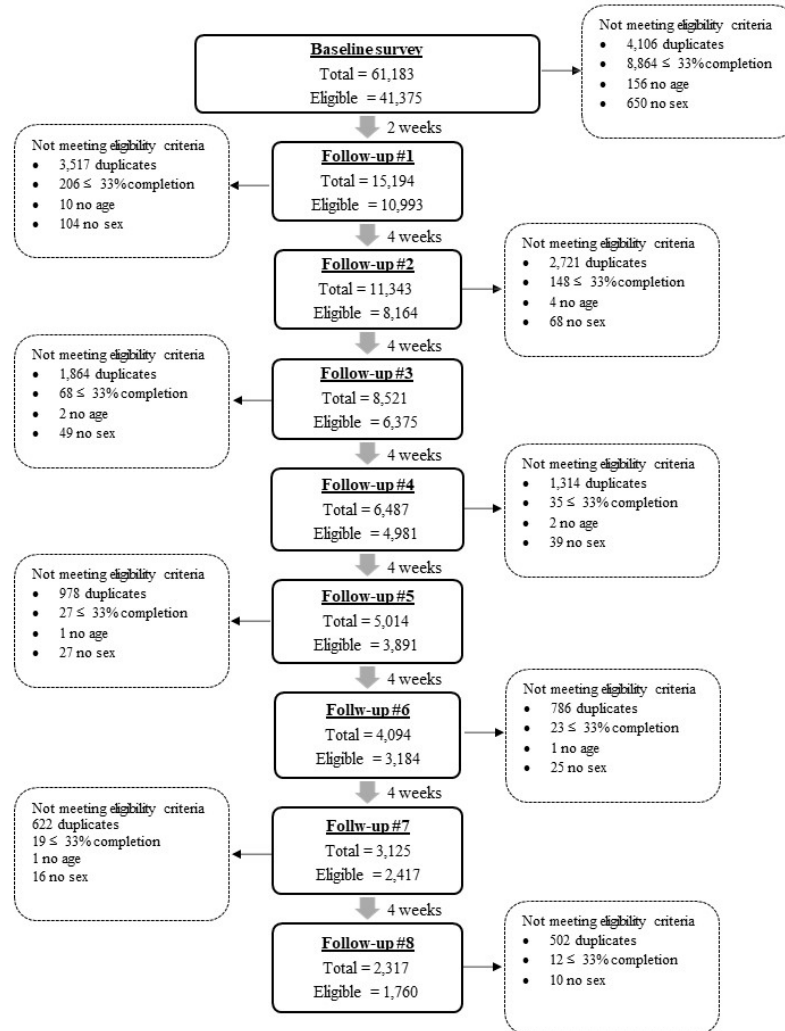

Figure 1. Participant flowchart

215x279mm (96 x 96 DPI)

## Supplementary files

### Quantifying contact patterns: development and characteristics of the British Columbia COVID-19 population mixing patterns survey (BC-Mix)

Prince A. Adu<sup>1,2</sup>, Mawuena Binka<sup>1</sup>, Bushra Mahmood,<sup>3</sup> Dahn Jeong<sup>1,2</sup>, Terri Buller-Taylor<sup>1</sup>, Makuza Jean Damascene<sup>1,2</sup>, Sarafa Iyaniwura<sup>1,4</sup>, Notice Ringa<sup>1,2</sup>, Héctor A. Velásquez García<sup>1,2</sup>, Stanley Wong<sup>1</sup>, Amanda Yu<sup>1</sup>, Sofia Bartlett<sup>1,6</sup>, James Wilton<sup>1</sup>, Mike A. Irvine<sup>1,7</sup>, Michael Otterstatter<sup>1,2</sup>, Naveed Z. Janjua<sup>1,2</sup>

<sup>1</sup>British Columbia Centre for Disease Control, Vancouver, British Columbia, Canada

<sup>2</sup>School of Population and Public Health, University of British Columbia, Vancouver, British Columbia, Canada

<sup>3</sup>Department of Medicine, University of British Columbia, Vancouver, British Columbia, Canada

<sup>4</sup>Department of Mathematics and Institute of Applied Mathematics, University of British Columbia, Vancouver, British Columbia, Canada

<sup>5</sup>Faculty of Health Sciences, Simon Fraser University, Burnaby, British Columbia, Canada

<sup>6</sup>Department of Pathology and Laboratory Medicine, Vancouver, British Columbia, Canada

<sup>7</sup>Faculty of Health Sciences, Simon Fraser University, Burnaby, British Columbia, Canada

**S1 Table:** BC-Mix variable names and definitions

| Domain                                    | Variable                                                                                                                          | Definition                                                                                                                                                                                                                                                                                                                                                                                                                                                                                                                                                                                                                                              |
|-------------------------------------------|-----------------------------------------------------------------------------------------------------------------------------------|---------------------------------------------------------------------------------------------------------------------------------------------------------------------------------------------------------------------------------------------------------------------------------------------------------------------------------------------------------------------------------------------------------------------------------------------------------------------------------------------------------------------------------------------------------------------------------------------------------------------------------------------------------|
| Demographic information                   |                                                                                                                                   |                                                                                                                                                                                                                                                                                                                                                                                                                                                                                                                                                                                                                                                         |
|                                           | Age, sex, gender, ethnicity, first name, last name, personal health number, postal code, employment status, education, occupation | Age, sex, gender, ethnicity, first name, last name, personal health number, postal code, employment status, education, occupation of respondent                                                                                                                                                                                                                                                                                                                                                                                                                                                                                                         |
|                                           | Number of adults living in respondent's household                                                                                 | How many adults live in your household?                                                                                                                                                                                                                                                                                                                                                                                                                                                                                                                                                                                                                 |
|                                           | Number of children living in respondent's household                                                                               | How many children (under 18 years) live in your household?                                                                                                                                                                                                                                                                                                                                                                                                                                                                                                                                                                                              |
| Perceptions and attitudes around COVID-19 |                                                                                                                                   |                                                                                                                                                                                                                                                                                                                                                                                                                                                                                                                                                                                                                                                         |
|                                           | Satisfaction with provincial COVID-19 response                                                                                    | How satisfied are you with how COVID-19 has been managed in the province?                                                                                                                                                                                                                                                                                                                                                                                                                                                                                                                                                                               |
|                                           | Knowledge of COVID-19                                                                                                             | How much do you know about COVID-19?                                                                                                                                                                                                                                                                                                                                                                                                                                                                                                                                                                                                                    |
|                                           | Attitude to COVID-19 #1                                                                                                           | To what extent do you agree or disagree with the following statements? - 1) COVID-19 would be a serious illness for me if I caught it 2) I think I am likely to catch COVID-19 3) If I don't follow government advice, I might spread COVID-19 to someone who is vulnerable. 4) My boss expects me to work when I am feeling unwell or sick 5) If I could not work because of COVID-19, I would still get paid 6) If I had to isolate myself for 14 days because of COVID-19, I would have enough food and supplies for 14 days 7) If I had to isolate myself for 14 days because of COVID-19... - Someone else would be able to look after my children |
|                                           | Attitude to COVID-19 #2                                                                                                           | How effective do you think the following are at slowing the spread of COVID-19? -1) Meeting up with fewer people than normal 2) Avoiding crowded spaces 3) Staying at home for 14 days if you have ... - Severe symptoms (e.g., severe cough or high temperature).                                                                                                                                                                                                                                                                                                                                                                                      |
|                                           | Attitude to COVID-19 #3                                                                                                           | How much, if at all, have you changed the number of face-to-face interactions with other people as a result of the COVID19 pandemic?                                                                                                                                                                                                                                                                                                                                                                                                                                                                                                                    |
|                                           | Attitude to COVID-19 #4                                                                                                           | How well do you think you are doing at keeping physically distanced from people outside your home?                                                                                                                                                                                                                                                                                                                                                                                                                                                                                                                                                      |
|                                           | Attitude to COVID-19 #5                                                                                                           | How concerned are you personally about the spread of COVID19?                                                                                                                                                                                                                                                                                                                                                                                                                                                                                                                                                                                           |
| Attitude toward COVID-19 vaccine          |                                                                                                                                   |                                                                                                                                                                                                                                                                                                                                                                                                                                                                                                                                                                                                                                                         |
|                                           | Vaccination status (1st or 2nd shot)                                                                                              | Have you received the COVID-19 vaccine (either 1st or 2nd shot)?                                                                                                                                                                                                                                                                                                                                                                                                                                                                                                                                                                                        |
|                                           | Date of 1st shot                                                                                                                  | When did you receive your 1st COVID-19 vaccine shot?                                                                                                                                                                                                                                                                                                                                                                                                                                                                                                                                                                                                    |
|                                           | Vaccination status (2nd shot)                                                                                                     | Have you received your 2nd COVID-19 vaccine shot?                                                                                                                                                                                                                                                                                                                                                                                                                                                                                                                                                                                                       |
|                                           | Date of 2nd shot                                                                                                                  | When did you receive your 2nd COVID-19 vaccine shot?                                                                                                                                                                                                                                                                                                                                                                                                                                                                                                                                                                                                    |
|                                           | Perceived risk                                                                                                                    | I believe I am at risk of becoming infected with COVID-19.                                                                                                                                                                                                                                                                                                                                                                                                                                                                                                                                                                                              |
|                                           | Perceived susceptibility                                                                                                          | With the way my life is, I believe I am at a high risk of getting COVID-19 (e.g., risks at my work, recreational activities, people I live with, etc.)                                                                                                                                                                                                                                                                                                                                                                                                                                                                                                  |
|                                           | Perceived protection 1                                                                                                            | I believe a COVID-19 Vaccine will protect me from getting the virus.                                                                                                                                                                                                                                                                                                                                                                                                                                                                                                                                                                                    |

|                                                               |                           |                                                                                                                                                                                                                                                                                                                                                                                                                             |
|---------------------------------------------------------------|---------------------------|-----------------------------------------------------------------------------------------------------------------------------------------------------------------------------------------------------------------------------------------------------------------------------------------------------------------------------------------------------------------------------------------------------------------------------|
|                                                               | Perceived protection 2    | I believe a COVID-19 vaccine will decrease my chance of getting seriously ill from COVID-19.                                                                                                                                                                                                                                                                                                                                |
|                                                               | Trust                     | I do not trust the COVID-19 vaccine.                                                                                                                                                                                                                                                                                                                                                                                        |
|                                                               | Effectiveness             | I am concerned about the effectiveness of the COVID-19 vaccination.                                                                                                                                                                                                                                                                                                                                                         |
|                                                               | Safety                    | I am concerned about the safety of the COVID-19 vaccination.                                                                                                                                                                                                                                                                                                                                                                |
|                                                               | Subjective norm 1         | Most of the people I know are getting or have received the COVID-19 vaccine.                                                                                                                                                                                                                                                                                                                                                |
|                                                               | Subjective norm 2         | Most of the people who are important to me (my family, relatives and/or friends) think I should get the COVID-19 vaccine.                                                                                                                                                                                                                                                                                                   |
|                                                               | Access                    | If I choose to get the COVID-19 vaccine, I believe it will be easy to get it.                                                                                                                                                                                                                                                                                                                                               |
|                                                               | Intention                 | I plan to get the COVID-19 vaccine.                                                                                                                                                                                                                                                                                                                                                                                         |
| COVID-19 testing and results, symptoms, and health behaviours |                           |                                                                                                                                                                                                                                                                                                                                                                                                                             |
|                                                               | COVID symptoms            | Since, January 2020, have you had any of the following symptoms? Check all that apply: headache, fever, stuffy nose/congestion, loss of smell or taste, new or worsening cough, difficulty breathing/shortness of breath, confusion, vomiting, chills, weakness, muscle pain, fatigue, nausea, diarrhea                                                                                                                     |
|                                                               | Date of first symptoms    | When did your first symptom start? (date)                                                                                                                                                                                                                                                                                                                                                                                   |
|                                                               | Action following symptoms | Have you done any of the following for these symptoms? (Please check all that apply). Called family doctor/ GP, visited family doctor's /GP office, visited community/public health clinic, been admitted to hospital etc.                                                                                                                                                                                                  |
|                                                               | Actions before symptoms   | Before these symptoms, had you been in close contact with anyone who either: (A) had any of those symptoms [fever, new or worsening cough, headache, chills, weakness, muscle pain, stuffy nose/congestion, sore throat, difficulty breathing/shortness of breath, nausea, diarrhea, fatigue, loss of smell or taste, confusion, vomiting]; OR (B) was diagnosed positive for COVID-19 within 14 days before you felt sick? |
|                                                               | Isolation before symptoms | Did you isolate, or stay away from your workplace or educational facility?                                                                                                                                                                                                                                                                                                                                                  |
|                                                               | COVID-19 test             | Have you been tested for COVID-19?                                                                                                                                                                                                                                                                                                                                                                                          |
|                                                               | Test results              | Did you test positive for COVID-19?                                                                                                                                                                                                                                                                                                                                                                                         |
|                                                               | Household symptoms        | Has anyone in your household either: (A) had any of the following symptoms: fever, new or worsening cough, headache, chills, weakness, muscle pain, stuffy nose/congestion, sore throat, difficulty breathing/shortness of breath, nausea, diarrhea, fatigue, loss of smell or taste, confusion, vomiting; OR (B) tested positive for COVID-19 since January 2020?                                                          |
|                                                               | First symptoms date       | When did their first symptom start? If you don't remember, please make your best guess.                                                                                                                                                                                                                                                                                                                                     |
|                                                               | Household isolation       | Has anyone in your household been told to quarantine, isolate, or limit time at their school or workplace since January 2020 because: they were sick or exposed to someone with COVID-19?                                                                                                                                                                                                                                   |



|                                                     |                               |                                                                                                                                                                                                                                                                                                                                                                                                                                                                                                                                                                                                                                                                |
|-----------------------------------------------------|-------------------------------|----------------------------------------------------------------------------------------------------------------------------------------------------------------------------------------------------------------------------------------------------------------------------------------------------------------------------------------------------------------------------------------------------------------------------------------------------------------------------------------------------------------------------------------------------------------------------------------------------------------------------------------------------------------|
|                                                     | Adherence                     | Did they follow the advice and isolate, quarantine, or stay away from their workplace or educational facility?                                                                                                                                                                                                                                                                                                                                                                                                                                                                                                                                                 |
| Activities and behaviour in and outside of the home |                               |                                                                                                                                                                                                                                                                                                                                                                                                                                                                                                                                                                                                                                                                |
|                                                     | Movement out of home          | How many times did you leave your home (or property, apartment) yesterday?                                                                                                                                                                                                                                                                                                                                                                                                                                                                                                                                                                                     |
|                                                     | Place of movement             | Where did you go when you left your home? (Check all that apply) - Another person's home, a workplace, a hospital, doctor's office etc.                                                                                                                                                                                                                                                                                                                                                                                                                                                                                                                        |
|                                                     | Distance                      | What is the farthest distance that you went from your home yesterday?                                                                                                                                                                                                                                                                                                                                                                                                                                                                                                                                                                                          |
|                                                     | Means of transport            | How did you travel when you left your home? (Check all that apply) - Selected Choice - I only walked (I did not use other transportation)                                                                                                                                                                                                                                                                                                                                                                                                                                                                                                                      |
|                                                     | Face mask use                 | Did you use a face mask yesterday?                                                                                                                                                                                                                                                                                                                                                                                                                                                                                                                                                                                                                             |
|                                                     | Face mask use location        | Where did you use your face mask yesterday? (Check all that apply) - Selected Choice - Everywhere outside my house                                                                                                                                                                                                                                                                                                                                                                                                                                                                                                                                             |
|                                                     | Mask use duration             | Take your best guess for the total amount of time you wore a mask yesterday (hours and minutes)?                                                                                                                                                                                                                                                                                                                                                                                                                                                                                                                                                               |
|                                                     | Presence at home              | In the last 3 hours, have you been in your home?                                                                                                                                                                                                                                                                                                                                                                                                                                                                                                                                                                                                               |
|                                                     | Handwashing                   | In the last 3 hours, have many times did you wash your hands with soap?                                                                                                                                                                                                                                                                                                                                                                                                                                                                                                                                                                                        |
|                                                     | Hand sanitizer                | In the last 3 hours, how many times did you use hand sanitizer?                                                                                                                                                                                                                                                                                                                                                                                                                                                                                                                                                                                                |
|                                                     | Transport type                | Yesterday, which type of public transportation did you use? (Please check all that apply) - Selected Choice - Airplane, bus, taxi etc                                                                                                                                                                                                                                                                                                                                                                                                                                                                                                                          |
|                                                     | Transport duration            | Yesterday, for about how long were you on public transportation?                                                                                                                                                                                                                                                                                                                                                                                                                                                                                                                                                                                               |
|                                                     | PPE use during transportation | Yesterday, did you wear any of the following while on public transportation? (Please check all that apply) - Selected Choice - A face mask or other covering over your nose and mouth (e.g., face shield, bandana), gloves, etc.                                                                                                                                                                                                                                                                                                                                                                                                                               |
|                                                     | Travel outside Canada         | Have you travelled outside Canada at all since Jan 2020? And if so, to where? - Selected Choice                                                                                                                                                                                                                                                                                                                                                                                                                                                                                                                                                                |
|                                                     | Number of contacts            | Now we would like to ask you some questions about people you had in-person, face-to-face contact with yesterday. By in-person, face-to-face contact, we mean EITHER: A. An in-person two-way conversation with three or more words OR B. Physical skin-to-skin contact (for example, a handshake, hug, kiss, or contact sports). This includes family members, friends, co-workers, people you spoke to in shops, bus drivers, strangers, etc... and people of ALL ages. Please do not count people you contacted only with things like telephone, text, or online. How many people did you have in-person contact with between 5 am yesterday and 5 am today? |
|                                                     | Contact identifier #1 to #10  | Please add a non-identifying "nickname" for each of the people you had face-to-face or physical contact with (e.g., DG, checkout person, bus driver, child #2). This "nickname" will help you to answer questions about this contact. - 1st person label                                                                                                                                                                                                                                                                                                                                                                                                       |

|                                                            |                                                                                                                                                                                                       |                                                                                                                                                                                                                                                                                                                                                                                                                                                                                                   |
|------------------------------------------------------------|-------------------------------------------------------------------------------------------------------------------------------------------------------------------------------------------------------|---------------------------------------------------------------------------------------------------------------------------------------------------------------------------------------------------------------------------------------------------------------------------------------------------------------------------------------------------------------------------------------------------------------------------------------------------------------------------------------------------|
|                                                            | Characteristics of contact #1 (gender, age, relationship to respondent)                                                                                                                               | For the people you "nicknamed" and had in-person contact with between 5am yesterday and 5am today... - I believe this person identifies as... [indicate gender, age, relationship to you, location of contact,                                                                                                                                                                                                                                                                                    |
|                                                            | Characteristics of contact #2                                                                                                                                                                         | Distance during contact, duration of contact, contact prior to COVID-19, PPE use during contact, distance during contact)                                                                                                                                                                                                                                                                                                                                                                         |
|                                                            | Location of contact of 10+ contacts                                                                                                                                                                   | You said you had more than 10 in-person contacts. Where did majority of these contacts take place?                                                                                                                                                                                                                                                                                                                                                                                                |
|                                                            | Occupational setting of 10+ contact                                                                                                                                                                   | You said you had more than 10 in-person contacts. Which of these best describes your work/occupation or the other person's workplace where these contacts took place?                                                                                                                                                                                                                                                                                                                             |
|                                                            | Age-group of contacts of 10+ contacts                                                                                                                                                                 | You said you had more than 10 in-person contacts. What was the age-group for most of these contacts you interacted with?                                                                                                                                                                                                                                                                                                                                                                          |
|                                                            | Duration of 10+ contact                                                                                                                                                                               | You said you had more than 10 in-person contacts. For most of these contacts, about how long did each contact last?                                                                                                                                                                                                                                                                                                                                                                               |
| <b>Internet and social media use and other information</b> |                                                                                                                                                                                                       |                                                                                                                                                                                                                                                                                                                                                                                                                                                                                                   |
|                                                            | Internet use                                                                                                                                                                                          | About how often do you use the internet?                                                                                                                                                                                                                                                                                                                                                                                                                                                          |
|                                                            | Social media use                                                                                                                                                                                      | Thinking about the social media sites that you use; about how often do you visit or use each of the following? - Facebook, Instagram, Twitter, Snapchat, YouTube                                                                                                                                                                                                                                                                                                                                  |
|                                                            | Survey start date, survey end date, IP address, survey duration, response ID, recorded date, respondent's first and last name, location latitude, location longitude, follow up consent, draw consent | Survey start date, survey end date, IP address, survey duration, response ID, recorded date, respondent's first and last name, location latitude, location longitude, follow up consent, draw consent                                                                                                                                                                                                                                                                                             |
| <b>Derived variables</b>                                   |                                                                                                                                                                                                       |                                                                                                                                                                                                                                                                                                                                                                                                                                                                                                   |
|                                                            | Health Authority                                                                                                                                                                                      | The health authority of respondent. This was derived using respondents postal code or location data.                                                                                                                                                                                                                                                                                                                                                                                              |
|                                                            | Quebec material index                                                                                                                                                                                 | The material deprivation involves deprivation of the goods and conveniences that are part of modern life, such as adequate housing, possession of a car, access to high-speed internet, or a neighbourhood with recreational areas. This deprivation marks the consequences of lack of material resources associated with low education, insecure job situation and insufficient income (1,2).                                                                                                    |
|                                                            | Quebec social index                                                                                                                                                                                   | Social deprivation refers to a fragile social network, starting with the family and encompassing the community. It is characterized by individuals living alone, being a lone parent and being separated, divorced, or widowed (1,2).                                                                                                                                                                                                                                                             |
|                                                            | Ethnocultural composition                                                                                                                                                                             | Ethno-cultural composition refers to the community make-up of immigrant populations, and at the British Columbia-level takes into consideration factors such as the proportion of population who self-identify as visible minority, the proportion of population that is foreign-born, the proportion of population with no knowledge of either official language (linguistic isolation), and the proportion of population who are recent immigrants (arrived in five years prior to Census). (1) |

|  |                           |                                                                                                                                                                                                                                                                                                                                                                                                                                                                                                                                                                     |
|--|---------------------------|---------------------------------------------------------------------------------------------------------------------------------------------------------------------------------------------------------------------------------------------------------------------------------------------------------------------------------------------------------------------------------------------------------------------------------------------------------------------------------------------------------------------------------------------------------------------|
|  | Situational vulnerability | Situational vulnerability speaks to variations in socio-demographic conditions in the areas of housing and education, while taking into account other demographic characteristics. The indicators in this dimension at the British Columbia-level measure concepts such as the proportion of population that identifies as Aboriginal, the proportion of population aged 25-64 without a high school diploma, the proportion of dwellings needing major repairs, the proportion of population that is low-income, and the proportion of single parent families (1). |
|  | Economic dependency       | Economic dependency relates to reliance on the workforce, or a dependence on sources of income other than employment income. Indicators included in this dimension at the British Columbia-level measure concepts such as the proportion of population participating in labour force (aged 15 and older), the proportion of population aged 65 and older, the ratio of employment to population, and the dependency ratio (population aged 0-14 and aged 65 and older divided by population aged 15-64)(1).                                                         |
|  | Residential instability   | Residential instability speaks to the tendency of neighbourhood inhabitants to fluctuate over time, taking into consideration both housing and familial characteristics. The indicators in this dimension at the British Columbia-level measure concepts such as the proportion of dwellings that are apartment buildings, the proportion of persons living alone, the proportion of dwellings that are owned, and the proportion of the population who moved within the past five years (1).                                                                       |

### References

1. Government of Canada SC. Canadian Index of Multiple Deprivation: Dataset [Internet]. 2019 [cited 2021 Jun 10]. Available from: <https://www150.statcan.gc.ca/n1/pub/45-20-0001/452000012019002-eng.htm>
2. Bureau d'information et d'études En Santé Des Populations (BIESP). Deprivation Index [Internet]. INSPQ. 2019 [cited 2021 May 27]. Available from: <https://www.inspq.qc.ca/en/deprivation/material-and-social-deprivation-index>

**S2 Table.** Comparison of baseline eligible and ineligible participants, frequencies and proportions

|                   |                                                  | Eligible (n=41,375) |                               |                               | Ineligible (n=15,702) ‡ |                               |                               |
|-------------------|--------------------------------------------------|---------------------|-------------------------------|-------------------------------|-------------------------|-------------------------------|-------------------------------|
|                   |                                                  | Frequency           | Percent<br>(incl.<br>missing) | Percent<br>(excl.<br>missing) | Frequency               | Percent<br>(incl.<br>missing) | Percent<br>(excl.<br>missing) |
| Sex               |                                                  |                     |                               |                               |                         |                               |                               |
|                   | Male                                             | 6,823               | 16.5                          | 16.5                          | 1,697                   | 10.8                          | 18.6                          |
|                   | Female                                           | 34,552              | 83.5                          | 83.5                          | 7,442                   | 47.4                          | 81.4                          |
|                   | Missing                                          | n/a                 | n/a                           | n/a                           | 6,563                   | 41.8                          | n/a                           |
| Age               |                                                  |                     |                               |                               |                         |                               |                               |
|                   | 18-34                                            | 4,978               | 12.0                          | 12.0                          | 1,726                   | 11.0                          | 17.7                          |
|                   | 35-54                                            | 12,110              | 29.3                          | 29.3                          | 3,039                   | 19.4                          | 31.2                          |
|                   | 55+                                              | 24,287              | 58.7                          | 58.7                          | 4,981                   | 31.7                          | 51.1                          |
|                   | Missing                                          | n/a                 | n/a                           | n/a                           | 5,956                   | 37.9                          | n/a                           |
| Race/ethnicity    |                                                  |                     |                               |                               |                         |                               |                               |
|                   | Indigenous                                       | 1,757               | 4.3                           | 4.4                           | 666                     | 4.2                           | 7.2                           |
|                   | Chinese                                          | 882                 | 2.1                           | 2.2                           | 238                     | 1.5                           | 2.6                           |
|                   | White                                            | 35,026              | 84.7                          | 87.5                          | 7,439                   | 47.4                          | 79.9                          |
|                   | South Asian                                      | 606                 | 1.5                           | 1.5                           | 315                     | 2.0                           | 3.4                           |
|                   | Other                                            | 1,766               | 4.3                           | 4.4                           | 649                     | 4.1                           | 7.0                           |
|                   | Missing/Unknown                                  | 1,338               | 3.2                           | n/a                           | 6,395                   | 40.7                          | n/a                           |
| Health region     |                                                  |                     |                               |                               |                         |                               |                               |
|                   | Fraser Health                                    | 8,451               | 20.4                          | 26.1                          | 1,802                   | 11.5                          | 31.0                          |
|                   | Interior Health                                  | 6,143               | 14.8                          | 19.0                          | 1,061                   | 6.8                           | 18.3                          |
|                   | Northern Island                                  | 1,825               | 4.4                           | 5.6                           | 312                     | 2.0                           | 5.4                           |
|                   | Vancouver Coastal                                | 7,315               | 17.7                          | 22.6                          | 1,329                   | 8.5                           | 22.9                          |
|                   | Vancouver Island                                 | 8,640               | 20.9                          | 26.7                          | 1,300                   | 8.3                           | 22.4                          |
|                   | Missing                                          | 9,001               | 21.8                          | n/a                           | 9,898                   | 63.0                          | n/a                           |
| Education         |                                                  |                     |                               |                               |                         |                               |                               |
|                   | Below high school                                | 807                 | 2.0                           | 2.5                           | 41                      | 0.3                           | 7.1                           |
|                   | Below bachelor                                   | 16,928              | 40.9                          | 51.7                          | 245                     | 1.6                           | 42.5                          |
|                   | University degree                                | 15,029              | 36.3                          | 45.9                          | 290                     | 1.8                           | 50.3                          |
|                   | Missing/Unknown                                  | 8,611               | 20.8                          | n/a                           | 15,126                  | 96.3                          | n/a                           |
| Employment status |                                                  |                     |                               |                               |                         |                               |                               |
|                   | Employed full-time<br>(30 hours or<br>more/week) | 10,654              | 25.7                          | 32.0                          | 210                     | 1.2                           | 31.6                          |
|                   | Employed part-time                               | 2,993               | 7.2                           | 9.0                           | 75                      | 0.4                           | 11.3                          |
|                   | Self-employed                                    | 2,704               | 6.5                           | 8.1                           | 64                      | 0.4                           | 9.6                           |

|    |               |                      |        |      |      |        |      |      |
|----|---------------|----------------------|--------|------|------|--------|------|------|
| 1  |               |                      |        |      |      |        |      |      |
| 2  |               |                      |        |      |      |        |      |      |
| 3  |               | Unemployed but       | 952    | 2.3  | 2.9  | 24     | 0.1  | 3.6  |
| 4  |               | looking for a job    |        |      |      |        |      |      |
| 5  |               |                      |        |      |      |        |      |      |
| 6  |               | Unemployed and not   | 406    | 1.0  | 1.2  | 10     | 0.1  | 1.5  |
| 7  |               | looking for a job    |        |      |      |        |      |      |
| 8  |               |                      |        |      |      |        |      |      |
| 9  |               | Full-time parent,    | 879    | 2.1  | 2.6  | 10     | 0.1  | 1.5  |
| 10 |               | homemaker            |        |      |      |        |      |      |
| 11 |               | Retired              | 12,757 | 30.8 | 38.3 | 87     | 0.5  | 13.1 |
| 12 |               |                      |        |      |      |        |      |      |
| 13 |               | Student/Pupil        | 566    | 1.4  | 1.7  | 67     | 0.4  | 10.1 |
| 14 |               |                      |        |      |      |        |      |      |
| 15 |               | Long-term sick or    | 968    | 2.3  | 2.9  | 31     | 0.2  | 4.7  |
| 16 |               | disabled             |        |      |      |        |      |      |
| 17 |               | Prefer not to answer | 424    | 1.0  | 1.3  | 87     | 0.5  | 13.1 |
| 18 |               |                      |        |      |      |        |      |      |
| 19 |               | Missing/Unknown      | 8,072  | 19.5 | n/a  | 15,037 | 84.8 | n/a  |
| 20 |               |                      |        |      |      |        |      |      |
| 21 | Quebec        |                      |        |      |      |        |      |      |
| 22 | Material      |                      |        |      |      |        |      |      |
| 23 | Deprivation   |                      |        |      |      |        |      |      |
| 24 | Index         |                      |        |      |      |        |      |      |
| 25 |               | 1 (Privileged)       | 6,407  | 15.5 | 22.3 | 690    | 4.4  | 13.8 |
| 26 |               | 2                    | 6,475  | 15.6 | 22.5 | 1,041  | 6.6  | 20.9 |
| 27 |               | 3                    | 6,972  | 16.9 | 24.2 | 1,538  | 9.8  | 30.8 |
| 28 |               | 4                    | 4,822  | 11.7 | 16.8 | 751    | 4.8  | 15.1 |
| 29 |               | 5 (Deprived)         | 4,085  | 9.9  | 14.2 | 969    | 6.2  | 19.4 |
| 30 |               | Missing              | 12,614 | 30.5 | n/a  | 10,713 | 68.2 | n/a  |
| 31 |               |                      |        |      |      |        |      |      |
| 32 | Quebec Social |                      |        |      |      |        |      |      |
| 33 | Deprivation   |                      |        |      |      |        |      |      |
| 34 | Index         |                      |        |      |      |        |      |      |
| 35 |               | 1 (Privileged)       | 4,932  | 11.9 | 17.2 | 1,018  | 6.5  | 20.4 |
| 36 |               | 2                    | 4,756  | 11.5 | 16.5 | 696    | 4.4  | 14.0 |
| 37 |               | 3                    | 6,311  | 15.3 | 21.9 | 1,275  | 8.1  | 25.6 |
| 38 |               | 4                    | 5,932  | 14.3 | 20.6 | 897    | 5.7  | 18.0 |
| 39 |               |                      |        |      |      |        |      |      |
| 40 |               | 5 (Deprived)         | 6,830  | 16.5 | 23.8 | 1,103  | 7.0  | 22.1 |
| 41 |               | Missing              | 12,614 | 30.5 | n/a  | 10,713 | 68.2 | n/a  |
| 42 |               |                      |        |      |      |        |      |      |
| 43 | Follow up     |                      |        |      |      |        |      |      |
| 44 | consent       |                      |        |      |      |        |      |      |
| 45 |               | Yes                  | 20,633 | 49.9 | 63.8 | 245    | 1.6  | 39.6 |
| 46 |               | No                   | 11,689 | 28.3 | 36.2 | 373    | 2.4  | 60.4 |
| 47 |               | Missing              | 9,053  | 21.9 | n/a  | 15,084 | 96.1 | n/a  |
| 48 |               |                      |        |      |      |        |      |      |
| 49 | Data linkage  |                      |        |      |      |        |      |      |
| 50 | consent       |                      |        |      |      |        |      |      |
| 51 |               | Yes                  | 7,290  | 17.6 | 27.3 | 95     | 0.6  | 17.3 |
| 52 |               | No                   | 19,467 | 47.1 | 72.8 | 454    | 2.9  | 82.7 |
| 53 |               | Missing              | 14,618 | 35.3 | n/a  | 15,153 | 96.5 | n/a  |
| 54 |               |                      |        |      |      |        |      |      |

‡Does not include 4,106 duplicates

**S3 Table.** Participant profile of BC-Mix follow up surveys: frequencies and proportions (%)

|                       | Follow up #1<br>(n=10,993) | Follow up #2<br>(n=8,164) | Follow up #3<br>(n=6,375) | Follow up #4<br>(n=4,981) | Follow up #5<br>(n=3,891) | Follow up #6<br>(n=3,184) | Follow up #7<br>(n=2,417) | Follow up #8<br>(n=1,760) |
|-----------------------|----------------------------|---------------------------|---------------------------|---------------------------|---------------------------|---------------------------|---------------------------|---------------------------|
| <b>Sex</b>            |                            |                           |                           |                           |                           |                           |                           |                           |
| Male                  | 1590 (14.5)                | 1115 (13.7)               | 843 (13.2)                | 646 (13.0)                | 495 (12.7)                | 404 (12.17)               | 312 (12.9)                | 217 (12.3)                |
| Female                | 9403 (85.5)                | 7049 (86.3)               | 5532 (86.8)               | 4335 (87.0)               | 3396 (87.3)               | 2780 (87.3)               | 2105 (87.1)               | 1543 (87.7)               |
| <b>Age</b>            |                            |                           |                           |                           |                           |                           |                           |                           |
| 18-34                 | 1128 (10.3)                | 731 (9.0)                 | 497 (7.8)                 | 363 (7.3)                 | 257 (6.6)                 | 199 (6.3)                 | 152 (6.3)                 | 109 (6.2)                 |
| 35-54                 | 3013 (27.4)                | 2105 (25.8)               | 1533 (24.1)               | 1127 (22.6)               | 846 (21.7)                | 662 (20.8)                | 495 (20.5)                | 343 (19.5)                |
| 55+                   | 6852 (62.3)                | 5328 (65.3)               | 4345 (68.2)               | 3491 (70.1)               | 2788 (71.7)               | 2323 (73.0)               | 1770 (73.2)               | 1308 (74.3)               |
| <b>Race/ethnicity</b> |                            |                           |                           |                           |                           |                           |                           |                           |
| Indigenous            | 342 (3.1)                  | 229 (2.8)                 | 162 (2.5)                 | 130 (2.6)                 | 91 (2.3)                  | 71 (2.2)                  | 54 (2.2)                  | 38 (2.2)                  |
| Chinese               | 199 (1.8)                  | 124 (1.5)                 | 98 (1.5)                  | 66 (1.3)                  | 48 (1.2)                  | 39 (1.2)                  | 25 (1.0)                  | 16 (0.9)                  |
| White                 | 9870 (89.8)                | 7415 (90.8)               | 5833 (91.5)               | 4586 (92.1)               | 3602 (92.6)               | 2959 (92.9)               | 2254 (93.3)               | 1642 (93.3)               |
| South Asian           | 79 (0.7)                   | 39 (0.5)                  | 30 (0.5)                  | 20 (0.4)                  | 15 (0.4)                  | 14 (0.4)                  | 12 (0.5)                  | 12 (0.7)                  |
| Other                 | 316 (2.9)                  | 229 (2.8)                 | 154 (2.4)                 | 108 (2.2)                 | 86 (2.2)                  | 63 (2.0)                  | 45 (1.9)                  | 35 (2.0)                  |
| Missing/Unknown       | 187(1.7)                   | 128 (1.6)                 | 98 (1.5)                  | 71 (1.4)                  | 49 (1.3)                  | 38 (1.2)                  | 27 (1.1)                  | 17 (1.0)                  |
| <b>Health region</b>  |                            |                           |                           |                           |                           |                           |                           |                           |
| Fraser Health         | 2748 (25.0)                | 2039 (25.0)               | 1590 (24.9)               | 1243 (25.0)               | 964 (24.8)                | 792 (24.9)                | 613 (25.4)                | 462 (26.3)                |
| Interior Health       | 1926 (17.5)                | 1435 (17.6)               | 1156 (18.1)               | 907 (18.2)                | 703 (18.1)                | 579 (18.2)                | 432 (17.9)                | 317 (18.0)                |
| Northern Island       | 506 (4.6)                  | 374 (4.6)                 | 280 (4.4)                 | 212 (4.3)                 | 162 (4.2)                 | 116 (3.4)                 | 88 (3.6)                  | 63 (3.6)                  |
| Vancouver Coastal     | 2706 (24.6)                | 1992 (24.4)               | 1540 (24.2)               | 1178 (23.7)               | 932 (24.0)                | 758 (23.8)                | 577 (23.9)                | 403 (22.9)                |
| Vancouver Island      | 3059 (27.8)                | 2303 (28.2)               | 1794 (28.1)               | 1430 (28.7)               | 1122 (28.8)               | 934 (29.3)                | 703 (29.1)                | 513 (29.2)                |
| Missing/Unknown       | 48 (0.4)                   | 21 (0.3)                  | 15 (0.2)                  | 11 (0.2)                  | 8 (0.2)                   | 5 (0.2)                   | 4 (0.2)                   | 2 (0.1)                   |
| <b>Education</b>      |                            |                           |                           |                           |                           |                           |                           |                           |
| Below high school     | 173 (1.5)                  | 123 (1.5)                 | 89 (1.4)                  | 68 (1.4)                  | 51 (1.3)                  | 37 (1.2)                  | 26 (1.1)                  | 16 (0.9)                  |
| Below bachelor        | 5236 (47.6)                | 3835 (47.0)               | 2979 (46.7)               | 2303 (46.2)               | 1771 (45.5)               | 1453 (45.6)               | 1108 (45.8)               | 802 (45.6)                |
| University degree     | 5529 (50.3)                | 4169 (51.1)               | 3283 (51.5)               | 2594 (52.1)               | 2057 (52.9)               | 1683 (52.9)               | 1278 (52.9)               | 939 (53.4)                |
| Missing/Unknown       | 55 (0.5)                   | 37 (0.5)                  | 24 (0.4)                  | 16 (0.3)                  | 12 (0.3)                  | 11 (0.4)                  | 5 (0.2)                   | 31 (0.2)                  |

|                                          | Follow up #1<br>(n=10,993) | Follow up #2<br>(n=8,164) | Follow up #3<br>(n=6,375) | Follow up #4<br>(n=4,981) | Follow up #5<br>(n=3,891) | Follow up #6<br>(n=3,184) | Follow up #7<br>(n=2,417) | Follow up #8<br>(n=1,760) |
|------------------------------------------|----------------------------|---------------------------|---------------------------|---------------------------|---------------------------|---------------------------|---------------------------|---------------------------|
| <b>Quebec Material Deprivation Index</b> |                            |                           |                           |                           |                           |                           |                           |                           |
| 1 (Privileged)                           | 1547 (14.1)                | 1072 (13.75)              | 896 (14.1)                | 720 (14.5)                | 569 (14.6)                | 435 (13.7)                | 344 (14.2)                | 253 (14.4)                |
| 2                                        | 2078 (18.9)                | 1547 (19.0)               | 1198 (18.8)               | 1008 (20.2)               | 806 (20.7)                | 665 (20.9)                | 500 (20.7)                | 366 (20.8)                |
| 3                                        | 2994 (27.3)                | 2184 (26.8)               | 1674 (26.3)               | 1273 (25.6)               | 973 (25.0)                | 835 (26.2)                | 642 (26.6)                | 450 (25.6)                |
| 4                                        | 1277 (11.6)                | 942 (11.64)               | 748 (11.7)                | 580 (11.6)                | 475 (12.2)                | 379 (11.9)                | 285 (11.8)                | 215 (12.2)                |
| 5 (Deprived)                             | 1668 (15.2)                | 1290 (15.8)               | 1033 (16.2)               | 728 (15.7)                | 609 (15.7)                | 504 (15.8)                | 375 (15.5)                | 278 (15.8)                |
| Missing                                  | 1429 (13.0)                | 1069 (13.1)               | 826 (13.0)                | 616 (12.4)                | 459 (11.8)                | 366 (11.5)                | 271 (11.2)                | 198 (11.3)                |
| <b>Quebec Social Deprivation Index</b>   |                            |                           |                           |                           |                           |                           |                           |                           |
| 1 (Privileged)                           | 2188 (19.9)                | 1641 (20.1)               | 1286 (20.2)               | 1063 (21.3)               | 830 (20.3)                | 658 (20.7)                | 509 (21.1)                | 368 (20.9)                |
| 2                                        | 1441 (13.1)                | 1051 (12.9)               | 787 (12.4)                | 603 (12.1)                | 480 (12.3)                | 411 (12.9)                | 314 (13.0)                | 225 (12.8)                |
| 3                                        | 2478 (22.5)                | 1831 (22.4)               | 1480 (23.2)               | 1148 (23.1)               | 922 (23.7)                | 769 (24.2)                | 574 (23.8)                | 419 (23.8)                |
| 4                                        | 1601 (14.6)                | 1236 (15.1)               | 945 (14.8)                | 743 (14.9)                | 578 (14.9)                | 488 (15.3)                | 370 (15.3)                | 290 (16.5)                |
| 5 (Deprived)                             | 1856 (16.9)                | 1336 (16.4)               | 1051 (16.5)               | 808 (16.2)                | 622 (16.0)                | 392 (15.5)                | 379 (15.7)                | 260 (14.8)                |
| Missing/Unknown                          | 1429 (13)                  | 1069 (13.1)               | 826 (13.0)                | 616 (12.4)                | 459 (11.8)                | 492 (11.5)                | 271 (11.2)                | 198 (11.3)                |
| <b>Follow up consent</b>                 |                            |                           |                           |                           |                           |                           |                           |                           |
| Yes                                      | 10357 (94.2)               | 7793 (95.5)               | 6182 (97.0)               | 4857 (97.5)               | 3789 (97.4)               | 3106 (97.6)               | 2380 (98.5)               | 1714 (97.4)               |
| No                                       | 262 (2.4)                  | 142 (1.7)                 | 83 (1.3)                  | 49 (1.0)                  | 47 (1.2)                  | 31 (1.0)                  | 17 (0.7)                  | 19 (1.1)                  |
| Missing                                  | 374 (3.4)                  | 229 (2.8)                 | 110 (1.7)                 | 75 (1.5)                  | 55 (1.4)                  | 47 (1.5)                  | 20 (0.8)                  | 27 (1.5)                  |

# BMJ Open

## Cohort profile: the British Columbia COVID-19 population mixing patterns survey (BC-Mix)

|                                 |                                                                                                                                                                                                                                                                                                                                                                                                                                                                                                                                                                                                                                                                                                                                                                                                                                                                                                                                                                                                                                                                                                                                                                                                                                                                                                                                                                                                                                                                                                                                                                                                                                    |
|---------------------------------|------------------------------------------------------------------------------------------------------------------------------------------------------------------------------------------------------------------------------------------------------------------------------------------------------------------------------------------------------------------------------------------------------------------------------------------------------------------------------------------------------------------------------------------------------------------------------------------------------------------------------------------------------------------------------------------------------------------------------------------------------------------------------------------------------------------------------------------------------------------------------------------------------------------------------------------------------------------------------------------------------------------------------------------------------------------------------------------------------------------------------------------------------------------------------------------------------------------------------------------------------------------------------------------------------------------------------------------------------------------------------------------------------------------------------------------------------------------------------------------------------------------------------------------------------------------------------------------------------------------------------------|
| Journal:                        | <i>BMJ Open</i>                                                                                                                                                                                                                                                                                                                                                                                                                                                                                                                                                                                                                                                                                                                                                                                                                                                                                                                                                                                                                                                                                                                                                                                                                                                                                                                                                                                                                                                                                                                                                                                                                    |
| Manuscript ID                   | bmjopen-2021-056615.R1                                                                                                                                                                                                                                                                                                                                                                                                                                                                                                                                                                                                                                                                                                                                                                                                                                                                                                                                                                                                                                                                                                                                                                                                                                                                                                                                                                                                                                                                                                                                                                                                             |
| Article Type:                   | Cohort profile                                                                                                                                                                                                                                                                                                                                                                                                                                                                                                                                                                                                                                                                                                                                                                                                                                                                                                                                                                                                                                                                                                                                                                                                                                                                                                                                                                                                                                                                                                                                                                                                                     |
| Date Submitted by the Author:   | 20-Apr-2022                                                                                                                                                                                                                                                                                                                                                                                                                                                                                                                                                                                                                                                                                                                                                                                                                                                                                                                                                                                                                                                                                                                                                                                                                                                                                                                                                                                                                                                                                                                                                                                                                        |
| Complete List of Authors:       | Adu, Prince; BC Centre for Disease Control; The University of British Columbia, School of Population and Public Health<br>Binka, Mawuena; BC Centre for Disease Control<br>Mahmood, Bushra; The University of British Columbia, Department of Medicine<br>Jeong, Dahn; BC Centre for Disease Control; The University of British Columbia, School of Population and Public Health<br>Buller-Taylor, Terri; BC Centre for Disease Control<br>Damascene, Makuza Jean; BC Centre for Disease Control; The University of British Columbia, School of Population and Public Health<br>Iyaniwura, Sarafa; BC Centre for Disease Control; The University of British Columbia, Department of Mathematics<br>Ringa, Notice; BC Centre for Disease Control; The University of British Columbia, School of Population and Public Health<br>Velásquez García, Héctor A.; BC Centre for Disease Control, School of Population and Public Health; The University of British Columbia<br>Wong, Stanley; BC Centre for Disease Control<br>Yu, Amanda; BC Centre for Disease Control<br>Bartlett, Sofia; BC Centre for Disease Control; The University of British Columbia, Department of Pathology and Laboratory Medicine<br>Wilton, James; BC Centre for Disease Control<br>Irvine, Mike A.; BC Centre for Disease Control; Simon Fraser University, Faculty of Health Sciences<br>Otterstatter, Michael; BC Centre for Disease Control; The University of British Columbia, School of Population and Public Health<br>Janjua, Naveed ; BC Centre for Disease Control; The University of British Columbia, School of Population and Public Health |
| <b>Primary Subject Heading</b>: | Public health                                                                                                                                                                                                                                                                                                                                                                                                                                                                                                                                                                                                                                                                                                                                                                                                                                                                                                                                                                                                                                                                                                                                                                                                                                                                                                                                                                                                                                                                                                                                                                                                                      |
| Secondary Subject Heading:      | Public health                                                                                                                                                                                                                                                                                                                                                                                                                                                                                                                                                                                                                                                                                                                                                                                                                                                                                                                                                                                                                                                                                                                                                                                                                                                                                                                                                                                                                                                                                                                                                                                                                      |
| Keywords:                       | COVID-19, PUBLIC HEALTH, Health & safety < HEALTH SERVICES ADMINISTRATION & MANAGEMENT, Epidemiology < INFECTIOUS DISEASES                                                                                                                                                                                                                                                                                                                                                                                                                                                                                                                                                                                                                                                                                                                                                                                                                                                                                                                                                                                                                                                                                                                                                                                                                                                                                                                                                                                                                                                                                                         |
|                                 |                                                                                                                                                                                                                                                                                                                                                                                                                                                                                                                                                                                                                                                                                                                                                                                                                                                                                                                                                                                                                                                                                                                                                                                                                                                                                                                                                                                                                                                                                                                                                                                                                                    |



1  
2  
3  
4  
5  
6  
7  
8  
9  
10  
11  
12  
13  
14  
15  
16  
17  
18  
19  
20  
21  
22  
23  
24  
25  
26  
27  
28  
29  
30  
31  
32  
33  
34  
35  
36  
37  
38  
39  
40  
41  
42  
43  
44  
45  
46  
47  
48  
49  
50  
51  
52  
53  
54  
55  
56  
57  
58  
59  
60

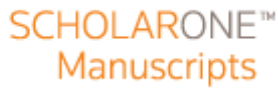

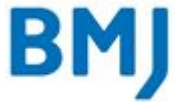

I, the Submitting Author has the right to grant and does grant on behalf of all authors of the Work (as defined in the below author licence), an exclusive licence and/or a non-exclusive licence for contributions from authors who are: i) UK Crown employees; ii) where BMJ has agreed a CC-BY licence shall apply, and/or iii) in accordance with the terms applicable for US Federal Government officers or employees acting as part of their official duties; on a worldwide, perpetual, irrevocable, royalty-free basis to BMJ Publishing Group Ltd ("BMJ") its licensees and where the relevant Journal is co-owned by BMJ to the co-owners of the Journal, to publish the Work in this journal and any other BMJ products and to exploit all rights, as set out in our [licence](#).

The Submitting Author accepts and understands that any supply made under these terms is made by BMJ to the Submitting Author unless you are acting as an employee on behalf of your employer or a postgraduate student of an affiliated institution which is paying any applicable article publishing charge ("APC") for Open Access articles. Where the Submitting Author wishes to make the Work available on an Open Access basis (and intends to pay the relevant APC), the terms of reuse of such Open Access shall be governed by a Creative Commons licence – details of these licences and which [Creative Commons](#) licence will apply to this Work are set out in our licence referred to above.

Other than as permitted in any relevant BMJ Author's Self Archiving Policies, I confirm this Work has not been accepted for publication elsewhere, is not being considered for publication elsewhere and does not duplicate material already published. I confirm all authors consent to publication of this Work and authorise the granting of this licence.

## Cohort profile: the British Columbia COVID-19 population mixing patterns survey (BC-Mix)

Prince A. Adu<sup>1,2</sup>, Mawuena Binka<sup>1</sup>, Bushra Mahmood,<sup>3</sup> Dahn Jeong<sup>1,2</sup>, Terri Buller-Taylor<sup>1</sup>, Makuza Jean Damascene<sup>1,2</sup>, Sarafa Iyaniwura<sup>1,4</sup>, Notice Ringa<sup>1,2</sup>, Héctor A. Velásquez García<sup>1,2</sup>, Stanley Wong<sup>1</sup>, Amanda Yu<sup>1</sup>, Sofia Bartlett<sup>1,6</sup>, James Wilton<sup>1</sup>, Mike A. Irvine<sup>1,7</sup>, Michael Otterstatter<sup>1,2</sup>, Naveed Z. Janjua<sup>1,2,8</sup>

<sup>1</sup>British Columbia Centre for Disease Control, Vancouver, British Columbia, Canada

<sup>2</sup>School of Population and Public Health, University of British Columbia, Vancouver, British Columbia, Canada

<sup>3</sup>Department of Medicine, University of British Columbia, Vancouver, British Columbia, Canada

<sup>4</sup>Department of Mathematics, University of British Columbia, Vancouver, British Columbia, Canada

<sup>5</sup>Faculty of Health Sciences, Simon Fraser University, Burnaby, British Columbia, Canada

<sup>6</sup>Department of Pathology and Laboratory Medicine, Vancouver, British Columbia, Canada

<sup>7</sup>Faculty of Health Sciences, Simon Fraser University, Burnaby, British Columbia, Canada

<sup>8</sup>Centre for Health Evaluation & Outcome Sciences, St. Paul's Hospital, Vancouver, British Columbia, Canada

Corresponding author:

Naveed Zafar Janjua MBBS, MSc, DrPH  
655 W 12th Ave, Vancouver, BC V5Z 4R4  
[Naveed.janjua@bccdc.ca](mailto:Naveed.janjua@bccdc.ca)

## ABSTRACT

### Purpose

Several non-pharmaceutical interventions such as physical distancing, hand washing, self-isolation, and schools and business closures, were implemented in British Columbia (BC) following the first laboratory-confirmed case of coronavirus disease 2019 (COVID-19) on January 26, 2020, to minimize in-person contacts that could spread infections. The BC COVID-19 Population Mixing Patterns survey (BC-Mix) was established as a surveillance system to measure behaviour and contact patterns in BC over time to inform the timing of the easing/reimposition of control measures. In this paper, we describe the BC-Mix survey design and the demographic characteristics of respondents.

### Participants

The ongoing repeated online survey was launched in September 2020. Participants are mainly recruited through social media platforms (including Instagram, Facebook, YouTube, WhatsApp). A follow up survey is sent to participants two to four weeks after completing the baseline survey. Survey responses are weighted to BC's population by age, sex, geography, and ethnicity to obtain generalizable estimates. Additional indices such as the material and social deprivation index, residential instability, economic dependency, and others are generated using census and location data.

### Findings to date

As of July 26, 2021, over 61,000 baseline survey responses were received of which 41,375 were eligible for analysis. Of the eligible participants, about 60% consented to follow up and about 27% provided their personal health numbers for linkage with healthcare databases. Approximately 50% of respondents were female, 39% were 55 years or older, 65% identified as white and 50% had at least a university degree.

### Future plans

Multiple papers describing contact patterns, physical distancing measures, regular handwashing and facemask wearing, modelling looking at impact of physical distancing measures and vaccine acceptance, hesitancy and uptake are either in progress or have been published.

## Strength and Limitations

- The sample size for this study is larger than comparable studies.
- Our methodology allows us to consider many auxiliary variables to enhance the representativeness of our sample to the general population.
- We employ an efficient and cost-effective recruitment strategy providing real time data.
- Some population groups are underrepresented in the survey possibly due to lack of access to social media.
- Our survey responses may be subject to recall bias since we ask respondents to recall contacts and other behaviours or activities from the previous day.

## Introduction

The novel coronavirus disease 2019 (COVID-19), caused by the severe acute respiratory syndrome coronavirus 2 (SARS-CoV-2), has spread worldwide since December 2019. A global pandemic was declared by the World Health Organization in March 2020 and, as of July 2021, there have been over 200 million cases of COVID-19 infections and over 4.3 million resultant deaths globally (1). As the rollout of COVID-19 vaccines continue at varying rates worldwide, physical distancing measures (2) remain among the most effective methods for COVID-19 prevention and control (3). Many governments have put in place physical distancing measures such as travel restrictions, closure of schools and workplaces, and the banning of large group gatherings to interrupt the transmission of SARS-CoV-2. These measures attempt to reduce contact between infected and healthy individuals in order to minimize disease spread and the impact on the healthcare system.

British Columbia (BC) is located on the West Coast of Canada and covers almost a million square kilometres. It has a diverse population of approximately 5.15 million as of July 1, 2020 (4). Public health officials in BC began urging the public to practice physical distancing and avoid any non-essential travel in early March 2020. By March 17, 2020, a public health emergency was declared in the province and various physical distancing measures were implemented (5). These included restriction of indoor and outdoor gatherings, closure of businesses that were unable to meet physical distancing measures, self-isolation requirements after travelling outside the country, and general physical distancing in all public space.

Assessing the impact of physical distancing measures on person-to-person contact can provide valuable information for refining control measures and help minimize both COVID-19-related disease burden and the related economic, social, and mental health impacts. Although methods such as mathematical modelling can estimate the potential for resurgences, these methods often lack population-based empirical data on contact patterns, especially on the varying levels of contact patterns exhibited by different demographic groups in the population.

1  
2  
3 These population-specific data could better inform mathematical models by incorporating  
4 explicit knowledge of contact patterns that are driving transmission rather than inferring these  
5 from reported cases and hospitalizations (6–8). Ultimately, they serve as an evidence-base to  
6 guide targeted measures that are amenable to actions by the government to ensure that the  
7 COVID-19 cases remain below the resurgence thresholds.  
8  
9

10 Various studies have assessed the impact of physical distancing measures imposed by  
11 governments on local contact patterns and behaviours during the COVID-19 pandemic in  
12 Belgium (8), Greece (9), Kenya (10), Luxembourg (11), the Netherlands (12), and the U.K (13).  
13 Others include Verelst and colleagues' SOCRATES-CoMix study (14) and a rapid review of  
14 social contact patterns by Liu et al. (15) Such surveys can measure the public's compliance with  
15 physical distancing measures and provide valuable information to inform other public health  
16 measures that may be necessary to avoid further waves of COVID-19 infections. In addition, the  
17 impact of physical distancing measures on mixing patterns and contact behaviours may vary  
18 across different age groups, and by individuals' primary place of activity such as schools or  
19 workplaces (9,16–18).  
20  
21  
22  
23

24 Here, we describe the development of the BC COVID-19 Population Mixing Patterns  
25 survey (BC-Mix), an ongoing online survey to monitor and assess social contact behaviours and  
26 mixing patterns in BC, Canada, during the COVID-19 pandemic. We detail the development of  
27 the survey and recruitment of respondents, as well as the characteristics of the participants.  
28  
29  
30

31 Cohort description

### 32 ***Survey design and methodology***

33 The BC-Mix (<http://www.bccdc.ca/our-research/projects/bc-mix-covid-19-survey>;  
34 <https://a4ph.med.ubc.ca/projects-and-initiatives/bc-mix/>) uses a cross-sectional survey design  
35 with longitudinal follow-up. Eligible population include residents of BC who are at least 18  
36 years of age. The survey began on September 4, 2020, and as at the time of this publication, is  
37 still ongoing. Once a participant has completed the survey for the first time, they are invited for  
38 repeated follow-up. The first-time responses are referred to as the 'baseline'. Participants  
39 responding to the baseline survey are invited to complete the first follow-up survey after two  
40 weeks. Subsequent follow-up surveys are then sent in four-week intervals, following the  
41 completion of the previous survey.  
42  
43  
44  
45  
46

### 47 ***Participant recruitment***

48 To capture participants from a broad demographic range, the survey invitation is disseminated  
49 through Instagram, Facebook, YouTube, WhatsApp, Twitter, and Google search engine results  
50 pages. The Google Ads Audience manager and Facebook Ads manager allow for paid  
51 advertisements to be targeted at specific audiences. We use these tools to target the survey  
52 advertisement campaigns to only residents of BC who are 18 years and above. We also monitor  
53 the demographic profile of survey participants and occasionally use these functions to target  
54  
55  
56  
57

1  
2  
3 recruitment of certain age groups or sex that may be underrepresented using the BC population  
4 as our point of reference (19).  
5

6 To help capture underrepresented groups, we promote the survey to various ethnic populations.  
7 For instance, a South Asian community organization promotes the survey on their social media  
8 pages and also sends the survey to individuals on their mailing list. Although the survey is in  
9 English, it is also promoted in different languages (specifically, Korean and Farsi) to members of  
10 minority community groups in BC on their social media pages. Flyers are also distributed at  
11 grocery stores and restaurants particularly including those frequented by minority groups.  
12  
13  
14

### 15 *Participant and public involvement*

16  
17 The initial version of the BC-Mix survey was first piloted with a randomly selected sample of the  
18 BC population and feedback received was incorporated in the final version before the official  
19 launch of the survey. Methods of recruitment and priority of research questions were also  
20 informed by discussions with members of the public and with a community group. We also  
21 receive input from survey participants on an ongoing basis through a dedicated e-mail address.  
22 We plan to create dashboards and other infographics of the study results on the study's website.  
23  
24  
25

### 26 *Survey domain and case definitions*

27 The BC-Mix survey instrument was adapted from the POLYMOD study (17) and the Berkeley  
28 Interpersonal Contact Study [BICS] (20), and was administered through Qualtrics (21), an online  
29 survey tool. The baseline survey comprises 94 questions across six key domains:  
30  
31

- 32 1. **Demographic information:** This domain includes age, sex, gender, ethnicity, education,  
33 employment, household characteristics, and postal code.
- 34 2. **COVID-19 testing and results, symptoms, and health behaviours:** This domain captures  
35 COVID-19 testing information, symptoms, and behaviours such as doctor visits following  
36 symptoms.  
37
- 38 3. **Activities and behaviour in and outside of the home:** This domain captures social contact  
39 and mixing behaviours such as number of contacts, location, and duration of contact during  
40 the past 24 hours. Other questions in this domain include age and sex of contact, and  
41 relationship of respondent to the contact persons, physical distancing behaviour (e.g.,  
42 handwashing) and personal protective equipment use. Initially, respondents were asked to  
43 provide this information for up to three of their reported contacts. We began collecting data  
44 on the characteristics of up to 10 contacts from December 11, 2020. Also from December 11,  
45 2020, we began collecting general information about greater than 10 contacts i.e., if a  
46 participant reports more than 10 contacts per day, they are asked general questions about  
47 these contacts for e.g., age group, duration, and location of the majority of those contacts. If  
48 majority of contacts took place at a workplace setting, a follow up question asks respondents  
49 to report the type of work setting where the contacts occurred.  
50
- 51 4. **Internet and social media use:** This domain captures information on internet and social  
52 media use, such as most frequently used platform and frequency of use.  
53  
54  
55  
56  
57



- 1  
2  
3  
4  
5  
6  
7  
8  
9  
10  
11  
12  
13  
14  
15  
16  
17  
18  
19  
20  
21  
22  
23  
24  
25  
26  
27  
28  
29  
30  
31  
32  
33  
34  
35
5. **Perceptions and attitudes around COVID-19:** This domain measures the respondent's perception of physical distancing measures, and their self-confidence or ability to carry them out.
  6. **COVID-19 vaccine acceptance sub-questionnaire:** This sub-questionnaire was added on March 8, 2021. Items from this domain were developed using a vaccine acceptance behavioral framework, which synthesizes constructs from the Theory of Reasoned Action (TRA)(22), Theory of Planned Behavior (TPB)(23,24) and the Health Belief Model (HBM) (25), to understand and predict the uptake of COVID-19 vaccine. According to the TRA, the best single predictor of behaviour is an individual's intention (26). Intentions, in turn, are an outcome of the individual's attitude toward performing the behavior in question, and/or the individual's perceptions of support from family and friends (subjective norms) for engaging in the behavior (27). Perceived control or self-efficacy, the confidence that one has the ability to perform the intended behavior (28), is another important construct taken from TPB. The TPB assumes that an individual's perception of whether they can successfully engage in a particular behavior often has a direct effect on their intentions, such as getting a vaccine (29). The widely-used HBM, has previously been used to evaluate beliefs and attitudes toward seasonal influenza and pandemic swine flu vaccines as well as the COVID-19 vaccine (30–33). Relevant constructs from HBM were applied to develop questionnaire items to assess perceived threat of contracting the COVID-19, perceived severity of disease if infected and belief in the safety and effectiveness of getting the vaccine. Overall, this sub-questionnaire is meant to provide an understanding of some of the individual level health beliefs, perceptions and attitudes that may influence vaccine uptake. The vaccine acceptance sub-questionnaire has the following domains: *Attitude (perceived susceptibility, severity, benefits and barriers), Descriptive and Subjective Norms, Perceived Control, and Intention.*

36  
37  
38  
39  
40  
41  
42  
43

Location data is used to generate other indicators at the area level. For example, the Quebec Material and Social Deprivation combines six indicators related to health and welfare that represent material or social deprivation based on Canadian Census data, including 1) proportion of persons without high school diploma 2) ratio of employment to population 3) average income 4) proportion of persons separated, divorced, widowed 5) proportion of single-parent families and 6) proportion of people living alone (34).

44  
45  
46

A full list of key variables in the survey and definitions is presented in S1 Table in the Supplementary file.

#### 47 48 49

***Analysis, data cleaning and weighting***

50  
51  
52  
53  
54  
55  
56  
57

Quota sampling has been used by other studies to achieve representativeness (8,35). We used two approaches to achieve the same goal: adaptive recruitment through promotion and targeting to specific populations, and post hoc weighting. Our survey tool does not set quotas on recruitment but uses targeted advertisements to improve representativeness.



1  
2  
3 All suspected duplicate responses are removed (i.e., a participant filling the survey more than  
4 once in a survey round). For suspected duplicates, the most recent record is retained, and others  
5 are removed. A survey completion rate of at least 33% of questions, and valid non-missing  
6 responses for the sex and age questions are required for inclusion for weighting the survey data  
7 and further analysis. To ensure that the BC-Mix sample is representative of the BC population,  
8 survey data are weighted using the weighting adjustment technique (36) to obtain generalizable  
9 estimates (Table 1). Using the 2016 Census data (37), the survey is weighted with the following  
10 auxiliary variables: age, sex, geography, and ethnicity in the following hierarchy: as our first  
11 criterion, we consider age, sex, geography and ethnicity as our auxiliary variables. If a record has  
12 valid responses for all these variables except the ethnicity variable, then the survey weight is  
13 generated using only age, sex, and geography (second criterion). If a record does not meet the  
14 first and second criteria, then we apply the third criterion which uses age, sex, and ethnicity as  
15 the auxiliary variables. Finally, we use only age and sex as auxiliary variables if a record does  
16 not satisfy the first three criteria.  
17  
18  
19  
20  
21  
22

23 Survey weights are estimated separately for baseline and for each follow-up. To assess  
24 participant profile, we computed un-weighted and weighted frequency and percentages of key  
25 demographic variables using SAS Software version 9.4. Baseline survey data was used to  
26 provide the survey participant profile and in comparison to the BC population profile (Table 1).  
27 To assess potential systematic differences between eligible and ineligible responses, a  
28 comparison of the baseline eligible participants versus ineligible participants is presented in S2  
29 Table in the Supplementary file. Participant profile of follow up surveys is also presented in S3  
30 Table in the Supplementary file.  
31  
32  
33

### 34 ***Ethics and dissemination***

35  
36 Informed consent was sought on the survey start page. The study was reviewed and approved by  
37 the University of British Columbia Behavioral Research Ethics Board (No: H20-01785). Data  
38 from BC-Mix contribute to modelling projections to inform COVID-19 control measures in BC  
39 (38). Multiple papers describing contact patterns, physical distancing measures, regular  
40 handwashing and facemask wearing, modelling looking at impact of physical distancing  
41 measures and vaccination levels, vaccine acceptance, hesitancy, and uptake are either in progress  
42 or have been published (39,40).  
43  
44  
45  
46

### 47 ***Preliminary results***

48  
49 As of July 26, 2021, there were 61,183 respondents who participated in the baseline survey of  
50 which 41,375 were eligible for analysis. There were 15,194 (eligible=10,993) participants in the  
51 first follow-up survey, 11,343 (eligible n=8,164) in the second, 8,521 (eligible n=6,375) in the  
52 third, 6,487 (eligible n=4,981) in the fourth, 5,014 (eligible=3,891) in the fifth, 4,094  
53 (eligible=3,184) in the sixth, 3,125 (eligible n= 2,417) in the seventh and 2,317 (eligible  
54 n=1,760) participants in the eighth follow-up survey (Figure 1). Examining the eligible baseline  
55  
56  
57

1  
2  
3 sample by month recruited, June 2021 recorded the highest proportion (19.9%) of recruited  
4 participants (S5 Table in the Supplementary File).

6  
7 Whereas the survey completion rate for the baseline survey was 64.7%, the least completion rate  
8 in the follow up surveys was 96.6% (S3 Table in the Supplementary File). Also, excluding  
9 duplicates, although 72.5% of the baseline records was eligible, all the follow up surveys had  
10 more than 94% eligible (S6 Table in the Supplementary File).

12  
13 Considering the baseline sample (Table 1), there were approximately equal number of male and  
14 female (weighted % of female =50.0%). Majority of participants were 55 years or older  
15 (weighted % = 39.4%), self identified as White (weighted % = 64.6%), had at least a university  
16 degree (weighted %= 50.0%) and lived in the Fraser Health region (weighted % = 36.2%).

18  
19 Almost 63.8% (unweighted n=20,633) consented to a follow-up after the baseline survey and at  
20 least 94.2% (unweighted n=10,357) consented to receiving subsequent follow-up surveys (Table  
21 1 and S3 Table in the Supplementary File). Approximately 27.3% (unweighted n=7,290) of  
22 respondents in the baseline provided their personal health numbers for linkage with other  
23 healthcare utilization databases.

25  
26 After weighting, the distribution of the baseline survey sample was similar to the general BC  
27 population in terms of age, sex, health region, and ethnicity (Table 1). The distribution of the  
28 eligible participants was also similar to the distribution of ineligible participants in terms of sex,  
29 age, race/ethnicity, and geography/health region (S2 Table in the Supplementary file). Moreover,  
30 in a sensitivity analysis, we used a cut off threshold of 67% instead of 33% and observed that the  
31 distribution of this sample was similar to the distribution obtained in our current eligible sample  
32 (S4 Table in the Supplementary file).

### 33 34 35 **Findings to date**

36  
37 Following the identification of COVID-19 cases in BC, several interventions including physical  
38 distancing measures were implemented to limit the spread of COVID-19 in the province.  
39 Subsequently, the BC-Mix was developed by the BC Centre for Disease Control (BCCDC)(41)  
40 as part of an early warning system for monitoring social and physical interactions between  
41 individuals of different age-groups and demography, and to help predict when COVID-19  
42 transmission might further increase. This paper describes the BC-Mix survey methods and the  
43 profile of survey respondents.

44  
45 Recent studies similar to the BC-Mix have assessed social contact patterns relevant to the spread  
46 and control of COVID-19 in different countries (8–13,42,43), many of which have adapted  
47 features of the POLYMOD project (17). The 2020 Belgian CoMix survey (8) is an online  
48 longitudinal survey that closely monitors changes in social mixing behaviours among a sample  
49 of Belgian adults (aged 18 years and above). The U.K CoMix survey assesses contact patterns of  
50 a representative sample of U.K adults. Launched on March 24, 2020, participants are followed  
51 up every 2 weeks to monitor changes in their self reported behaviours (13). In Canada, the  
52  
53  
54  
55  
56  
57

1  
2  
3 Quebec-based CONNECT study uses population-based survey to assess social contacts and  
4 mixing patterns (42). Brankston and colleagues (43) also used paid panel representative of  
5 Canadian adults to construct contact patterns and determine the impact of physical distancing  
6 measures on COVID-19 transmission. Most of these studies commissioned market research  
7 companies or used survey panels to recruit participants (8,13,20,43). While market companies or  
8 survey panels offer a convenient approach to sampling, they have some challenges. Panels are  
9 made of membership in loyalty programs or other panels constituting a select group of the  
10 population, and therefore, may not represent complete random recruitment from a population of  
11 interest.  
12  
13  
14  
15

16 The use of targeted social media advertisement for participant recruitment has gained  
17 prominence in health research (19,44), having been applied in areas such as mental health (45),  
18 cannabis use (46), smoking behaviour (47) and other health related studies (48). For our survey,  
19 we use social media advertisement and other recruitment strategies. Although social media-based  
20 recruitment does not necessarily generate a random sample of the general population given the  
21 characteristics of people who are on social media may differ from those who are not, social  
22 media channels like Facebook, Instagram, Twitter, and others have powerful targeting  
23 capabilities that allow researchers to target advertisements to users with specific demographic  
24 characteristics. They also have the advantage of reaching hard-to-reach populations (49).  
25  
26  
27  
28

### 29 ***Strengths and limitations***

30  
31 The following issues should be considered for interpretation of results from BC-Mix. Some  
32 population groups are underrepresented in the survey, possibly due to the lack of access to social  
33 media. These are people who are economically marginalised and less likely to have access to a  
34 computer/electronic device or to have access to the internet or cellular data, e.g., people living in  
35 poverty, people who are unemployed, people who are unhoused, etc. Additionally, people who  
36 are in prison (sentenced or on remand) or people who are under immigration detention may not  
37 have access to the internet or cellular devices. Our survey responses may also be subject to recall  
38 bias since we ask respondents to recall contacts and other behaviours or activities from the  
39 previous day. Other studies have used diaries (17) to overcome this weakness but this may be  
40 logistically challenging and attrition with this method may be quite high. Another potential bias  
41 inherent in our survey is the issue of reporting bias, as respondents may respond in ways  
42 consistent with the laws around physical distancing. In addition, the BC-Mix is available only in  
43 English, thus excluding individuals who cannot communicate in English. This notwithstanding,  
44 according to the 2016 Census, 96.6% of BC's population indicated that they can converse in  
45 English (37). Therefore, we do not believe that any bias associated with language would be  
46 significant. Another limitation is the large number of recruits that were ineligible and the attrition  
47 between successive rounds of survey. This could be related to survey fatigue, or the time  
48 required to complete the survey. Also, although we used survey weights to improve the  
49 representativeness of our sample, this was by no means perfect as some differences in the  
50  
51  
52  
53  
54  
55  
56  
57

1  
2  
3 distribution of some characteristics can still be observed between our weighted sample and the  
4 BC population.  
5

6  
7 Our survey has several strengths. Web-based surveys like the BC-Mix provide timely  
8 information for pandemic response (49). Also, during an infectious disease pandemic, web-based  
9 surveys offer a more convenient approach to data collection compared to in-person or other  
10 modes of data collection. We also found paid advertisements to be more cost effective compared  
11 to the cost of panel data from survey companies (44). An additional strength of our study is its  
12 large sample size. Our total recruited sample of over 61,000 participants compares to the 1,356  
13 participants in the U.K. CoMix study (13), the 9,743 participants in the BICS study (20) study,  
14 1,542 participants in the Belgian CoMix study (8) and the 7,290 participants in the POLYMOD  
15 study (17). In addition, because we opted to achieve representativeness post-data collection (at  
16 the analysis stage), we were able to consider geography and ethnicity in our weighting strategy.  
17 It would have been logistically challenging to consider these variables together with other  
18 variables had we used quota-sampling given that many market research company panels were  
19 limited in terms recruitment by age, sex, and geography. Using many auxiliary variables in our  
20 weighting strategy increased the representativeness of the BC population.  
21  
22  
23  
24  
25

## 26 **Collaboration**

27  
28 The BC-Mix will continue to collect relevant data on behaviour and contact patterns in BC to  
29 reflect the changing dynamics of the COVID-19 pandemic. The BC-Mix has an overarching  
30 governance structure. We welcome further collaboration from interested researchers. Data  
31 requests should be sent to the Principal Investigator, Dr. Naveed Z. Janjua (corresponding  
32 author).  
33  
34

## 35 **Conclusion**

36  
37 To our knowledge, the BC-Mix is the first and largest surveillance tool providing real time  
38 quantitative data on mixing patterns and contact characteristics in BC and one of the largest in  
39 North America. Tools such as the BC-Mix are integral to the COVID-19 pandemic response as  
40 they provide critical data that can be used to inform the timing of loosening or re-imposition of  
41 physical distancing measures. Further analyses on contact patterns, relationship of contact  
42 patterns with transmission, disparities in contact patterns, and facemask use, are either in  
43 progress or have been published (39,40).  
44  
45  
46

## 47 **Supporting information**

48  
49 S1 Table. BC-Mix variable names and definitions

50  
51 S2 Table. Comparison of baseline eligible and ineligible participants, frequencies, and  
52 proportions

53  
54 S3 Table. Participant profile of BC-Mix follow up surveys: frequencies and proportions (%)

55  
56 S4 Table. Participant profile of BC-Mix baseline data (n=33, 650), using at least 67% survey  
57 completion threshold

S5 Table. BC-Mix eligible sample (baseline) by month recruited

S6 Table. Comparison of participant eligibility across survey rounds

### Authors' contributions

**Conceptualization:** Naveed Z. Janjua, Prince A. Adu

**Survey design:** Naveed Z. Janjua, Prince A. Adu, Terri Buller-Taylor, Bushra Mahmood

**Data curation:** Prince A. Adu, Amanda Yu, Stanley Wong

**Statistical analysis:** Prince A. Adu

**Funding acquisition:** Naveed Janjua

**Methodology:** Naveed Z. Janjua, Prince A. Adu, Mawuena Binka, Terri Buller-Taylor, Bushra Mahmood, Sarafa Iyaniwura, Michael Otterstatter

**Writing first draft:** Prince A. Adu, Dahn Jeong, Mawuena Binka, Terri Buller-Taylor, Sarafa Iyaniwura, Notice Ringa

**Writing-review & editing:** Naveed Z. Janjua, Héctor A. Velásquez García, Bushra Mahmood, Makuza Jean Damascene, Mawuena Binka, James Wilton, Sofia Bartlett, Michael Otterstatter, Mike Irvine.

### Acknowledgement

The authors would like to express their gratitude to Dr Joan Hu, Department of Statistics and Actuarial Science, Simon Fraser University and Mei Chong of BC Centre for Disease Control for their methodological guidance. We are also grateful to all residents of British Columbia who participated in the British Columbia COVID-19 Population Mixing Patterns (BC-Mix) survey.

### Funding statement

This work was supported by Michael Smith Foundation for Health Research COVID-19 Research Response Fund (Award #: COV-2020-1183)

### Competing interests statement

None declared

### Figures

Figure 1. Participant flow chart for British Columbia COVID-19 population mixing patterns survey (BC-Mix) [baseline and first eight follow-up data]



## References

1. Johns Hopkins Coronavirus Resource Center. COVID-19 Map [Internet]. Johns Hopkins Coronavirus Resource Center. [cited 2021 May 23]. Available from: <https://coronavirus.jhu.edu/map.html>
2. Lu H, Stratton CW, Tang Y. Outbreak of pneumonia of unknown etiology in Wuhan, China: The mystery and the miracle. *J Med Virol*. 2020 Apr;92(4):401–2.
3. Islam N, Sharp SJ, Chowell G, Shabnam S, Kawachi I, Lacey B, et al. Physical distancing interventions and incidence of coronavirus disease 2019: natural experiment in 149 countries. *BMJ*. 2020 Jul 15;370:m2743.
4. BC Stats. 2020 Sub-Provincial Population Estimates Highlights. 2020 Jul;4.
5. Joint statement on Province of B.C.'s COVID-19 response, latest updates |BC Gov News [Internet]. 2020 [cited 2021 May 23]. Available from: <https://news.gov.bc.ca/releases/2020HLTH0089-000505>
6. Ferguson N, Laydon DJ, Nedjati Gilani G, Imai N, Ainslie KM, Baguelin M, et al. Report 9: Impact of non-pharmaceutical interventions (NPIs) to reduce COVID19 mortality and healthcare demand. 2020 Jan 1 [cited 2021 Jul 19]; Available from: <https://www.scienceopen.com/document?vid=4e6290c9-0ded-40ed-b858-ba18119863c0>
7. Zhang J, Litvinova M, Liang Y, Wang Y, Wang W, Zhao S, et al. Changes in contact patterns shape the dynamics of the COVID-19 outbreak in China. *Science*. 2020 Jun 26;368(6498):1481–6.
8. Coletti P, Wambua J, Gimma A, Willem L, Vercruyssen S, Vanhoutte B, et al. CoMix: comparing mixing patterns in the Belgian population during and after lockdown. *Sci Rep*. 2020 Dec 14;10(1):21885.
9. Sypsa V, Roussos S, Paraskevis D, Lytras T, Tsiodras S, Hatzakis A. Effects of Social Distancing Measures during the First Epidemic Wave of Severe Acute Respiratory Syndrome Infection, Greece. *Emerg Infect Dis*. 2021 Feb;27(2):452–62.
10. Quaife M, van Zandvoort K, Gimma A, Shah K, McCreesh N, Prem K, et al. The impact of COVID-19 control measures on social contacts and transmission in Kenyan informal settlements. *BMC Med*. 2020 Oct 5;18(1):316.
11. Latsuzbaia A, Herold M, Bertemes JP, Mossong J. Evolving social contact patterns during the COVID-19 crisis in Luxembourg. *PLOS ONE*. 2020 Aug 6;15(8):e0237128.
12. Backer JA, Mollema L, Vos RAE, Klinkenberg D, Klis FRM van der, Melker HE de, et al. The impact of physical distancing measures against COVID-19 transmission on contacts

- and mixing patterns in the Netherlands: repeated cross-sectional surveys in 2016/2017, April 2020 and June 2020. medRxiv. 2020 Oct 16;2020.05.18.20101501.
13. Jarvis CI, Van Zandvoort K, Gimma A, Prem K, Auzenbergs M, O'Reilly K, et al. Quantifying the impact of physical distance measures on the transmission of COVID-19 in the UK. *BMC Med.* 2020 May 7;18(1):124.
  14. Verelst F, Hermans L, Vercruyse S, Gimma A, Coletti P, Backer JA, et al. SOCRATES-CoMix: a platform for timely and open-source contact mixing data during and in between COVID-19 surges and interventions in over 20 European countries. *BMC Med.* 2021 Sep 29;19(1):254.
  15. Liu CY, Berlin J, Kiti MC, Del Fava E, Grow A, Zagheni E, et al. Rapid Review of Social Contact Patterns During the COVID-19 Pandemic. *Epidemiology.* 2021 Nov;32(6):781–91.
  16. Davies NG, Klepac P, Liu Y, Prem K, Jit M, Eggo RM. Age-dependent effects in the transmission and control of COVID-19 epidemics. *Nat Med.* 2020 Aug;26(8):1205–11.
  17. Mossong J, Hens N, Jit M, Beutels P, Auranen K, Mikolajczyk R, et al. Social Contacts and Mixing Patterns Relevant to the Spread of Infectious Diseases. *PLOS Med.* 2008 Mar 25;5(3):e74.
  18. Wallinga J, Teunis P, Kretzschmar M. Using data on social contacts to estimate age-specific transmission parameters for respiratory-spread infectious agents. *Am J Epidemiol.* 2006 Nov 15;164(10):936–44.
  19. Grow A, Perrotta D, Fava ED, Cimentada J, Rampazzo F, Gil-Clavel S, et al. Addressing Public Health Emergencies via Facebook Surveys: Advantages, Challenges, and Practical Considerations. *J Med Internet Res.* 2020 Dec 14;22(12):e20653.
  20. Feehan DM, Mahmud AS. Quantifying population contact patterns in the United States during the COVID-19 pandemic. *Nat Commun.* 2021 Feb 9;12(1):893.
  21. Qualtrics. Qualtrics [Internet]. Provo, Utah, USA: Qualtrics; 2021. Available from: <https://www.qualtrics.com>
  22. Ajzen I, Fishbein M. *Understanding attitudes and predicting social behavior* Prentice-Hall Inc. Englewood Cliffs, NJ; 1980.
  23. Ajzen I. From Intentions to Actions: A Theory of Planned Behavior. In: Kuhl J, Beckmann J, editors. *Action Control: From Cognition to Behavior* [Internet]. Berlin, Heidelberg: Springer; 1985 [cited 2021 Jun 15]. p. 11–39. (SSSP Springer Series in Social Psychology). Available from: [https://doi.org/10.1007/978-3-642-69746-3\\_2](https://doi.org/10.1007/978-3-642-69746-3_2)
  24. Ajzen I. The theory of planned behavior. *Organ Behav Hum Decis Process.* 1991 Dec 1;50(2):179–211.



- 1  
2  
3 25. Becker MH. The health belief model and personal health behavior. *Health Educ Monogr.* 1974;2:324–473.
- 4  
5  
6 26. Fishbein M, Ajzen I. *Belief, Attitude, Intention, and Behavior: An Introduction to Theory and Research.* Reading, MA: Addison-Wesley; 1975.
- 7  
8  
9 27. Sheppard BH, Hartwick J, Warshaw PR. The Theory of Reasoned Action: A Meta-Analysis of Past Research with Recommendations for Modifications and Future Research. *J Consum Res.* 1988 Dec 1;15(3):325–43.
- 10  
11  
12 28. Bogoch II, Watts A, Thomas-Bachli A, Huber C, Kraemer MUG, Khan K. Pneumonia of unknown aetiology in Wuhan, China: potential for international spread via commercial air travel. *J Travel Med.* 2020 Mar 13;27(2).
- 13  
14  
15 29. Fisher WA, Kohut T, Salisbury CMA, Salvadori MI. Understanding human papillomavirus vaccination intentions: comparative utility of the theory of reasoned action and the theory of planned behavior in vaccine target age women and men. *J Sex Med.* 2013 Oct;10(10):2455–64.
- 16  
17  
18 30. Santos AJ, Kislaya I, Machado A, Nunes B. Beliefs and attitudes towards the influenza vaccine in high-risk individuals. *Epidemiol Infect.* 2017 Jul;145(9):1786–96.
- 19  
20  
21 31. Teitler-Regev S, Shahrabani S, Benzion U. Factors Affecting Intention among Students to Be Vaccinated against A/H1N1 Influenza: A Health Belief Model Approach. *Adv Prev Med.* 2011 Dec 20;2011:e353207.
- 22  
23  
24 32. Wong MCS, Wong ELY, Huang J, Cheung AWL, Law K, Chong MKC, et al. Acceptance of the COVID-19 vaccine based on the health belief model: A population-based survey in Hong Kong. *Vaccine.* 2021 Feb 12;39(7):1148–56.
- 25  
26  
27 33. Wambua J, Hermans L, Coletti P, Verelst F, Willem L, Jarvis C, et al. The influence of risk perceptions on close contact frequency during the SARS-CoV-2 pandemic [Internet]. In *Review*; 2021 Nov [cited 2022 Mar 16]. Available from: <https://www.researchsquare.com/article/rs-996488/v1>
- 28  
29  
30 34. Bureau d'information et d'études En Santé Des Populations (BIESP). Deprivation Index [Internet]. INSPQ. 2019 [cited 2021 May 27]. Available from: <https://www.inspq.qc.ca/en/deprivation/material-and-social-deprivation-index>
- 31  
32  
33 35. Leung K, Jit M, Lau EHY, Wu JT. Social contact patterns relevant to the spread of respiratory infectious diseases in Hong Kong. *Sci Rep.* 2017 Aug 11;7(1):7974.
- 34  
35  
36 36. Bethlehem JG. *Applied survey methods: a statistical perspective.* Hoboken, N.J: Wiley; 2009. 375 p. (Wiley series in survey methodology).
- 37  
38  
39 37. Government of Canada SC. *Census Profile, 2016 Census - British Columbia [Province] and Canada [Country]* [Internet]. 2017 [cited 2021 Jul 25]. Available from: <https://www12.statcan.gc.ca/census-recensement/2016/dp->
- 40  
41  
42  
43  
44  
45  
46  
47  
48  
49  
50  
51  
52  
53  
54  
55  
56  
57

pd/prof/details/page.cfm?Lang=E&Geo1=PR&Code1=59&Geo2=PR&Code2=01&Search  
Text=Canada&SearchType=Begins&SearchPR=01&B1=All&type=0

38. BC Centre for Disease Control. Epidemiology & Modelling Presentations [Internet]. [cited 2022 Apr 12]. Available from: <http://www.bccdc.ca/health-info/diseases-conditions/covid-19/modelling-projections>
39. Iyaniwura SA, Falcão RC, Ringa N, Adu PA, Spencer M, Taylor M, et al. Mathematical modeling of COVID-19 in British Columbia: An age-structured model with time-dependent contact rates. *Epidemics*. 2022 Apr 9;100559.
40. Ringa N, Otterstatter MC, Iyaniwura SA, Irvine MA, Adu P, Janjua NZ, et al. Social contacts and transmission of COVID-19 in British Columbia, Canada. *Front Public Health* [Internet]. 2022 [cited 2021 Sep 28]; Available from: <https://www.frontiersin.org/articles/10.3389/fpubh.2022.867425/abstract>
41. BC Centre for Disease Control. What We Do [Internet]. [cited 2021 Jun 10]. Available from: <http://www.bccdc.ca/about/what-we-do>
42. Institut national de, santé publique du Québec. CONNECT : étude des contacts sociaux des Québécois - 27 avril 2021 [Internet]. INSPQ. [cited 2021 Jun 17]. Available from: <https://www.inspq.qc.ca/covid-19/donnees/connect/27-avril-2021>
43. Brankston G, Merkley E, Fisman DN, Tuite AR, Poljak Z, Loewen PJ, et al. Quantifying Contact Patterns in Response to COVID-19 Public Health Measures in Canada. *medRxiv*. 2021 Mar 12;2021.03.11.21253301.
44. Thornton L, Batterham PJ, Fassnacht DB, Kay-Lambkin F, Calear AL, Hunt S. Recruiting for health, medical or psychosocial research using Facebook: Systematic review. *Internet Interv*. 2016 May 1;4:72–81.
45. Choi I, Milne DN, Glozier N, Peters D, Harvey SB, Calvo RA. Using different Facebook advertisements to recruit men for an online mental health study: Engagement and selection bias. *Internet Interv*. 2017 Jun 1;8:27–34.
46. Borodovsky JT, Marsch LA, Budney AJ. Studying Cannabis Use Behaviors With Facebook and Web Surveys: Methods and Insights. *JMIR Public Health Surveill*. 2018 May 2;4(2):e9408.
47. Ramo DE, Prochaska JJ. Broad Reach and Targeted Recruitment Using Facebook for an Online Survey of Young Adult Substance Use. *J Med Internet Res*. 2012 Feb 23;14(1):e1878.
48. Fazzino TL, Rose GL, Pollack SM, Helzer JE. Recruiting U.S. and Canadian College Students via Social Media for Participation in a Web-Based Brief Intervention Study. *J Stud Alcohol Drugs*. 2015 Jan 1;76(1):127–32.

- 1  
2  
3 49. Hlatshwako TG, Shah SJ, Kosana P, Adebayo E, Hendriks J, Larsson EC, et al. Online  
4 health survey research during COVID-19. Lancet Digit Health. 2021 Feb 1;3(2):e76–7.  
5  
6  
7  
8  
9  
10  
11  
12  
13  
14  
15  
16  
17  
18  
19  
20  
21  
22  
23  
24  
25  
26  
27  
28  
29  
30  
31  
32  
33  
34  
35  
36  
37  
38  
39  
40  
41  
42  
43  
44  
45  
46  
47  
48  
49  
50  
51  
52  
53  
54  
55  
56  
57  
58  
59  
60

For peer review only

**Table 1.** Participant profile of BC-Mix baseline data (n=41,375), September 04, 2020-July 26, 2021

|                          |                                            | Survey                |                               |                    |            | British Columbia population |              |
|--------------------------|--------------------------------------------|-----------------------|-------------------------------|--------------------|------------|-----------------------------|--------------|
|                          |                                            | Un-weighted frequency | Un-weighted % (excl. missing) | Weighted frequency | Weighted % | Population frequency        | Population % |
| <b>Sex</b>               |                                            |                       |                               |                    |            |                             |              |
|                          | Male                                       | 6,823                 | 16.5                          | 21,293             | 50.0       | 1,805,105                   | 48.5         |
|                          | Female                                     | 34,552                | 83.5                          | 21,261             | 50.0       | 1,914,755                   | 51.5         |
|                          | Missing                                    |                       |                               |                    |            |                             |              |
| <b>Age</b>               |                                            |                       |                               |                    |            |                             |              |
|                          | 18-34                                      | 4,978                 | 12.0                          | 11,575             | 27.2       | 1,002,745                   | 27           |
|                          | 35-54                                      | 12,110                | 29.3                          | 14,194             | 33.4       | 1,251,835                   | 33.7         |
|                          | 55+                                        | 24,287                | 58.7                          | 16,784             | 39.4       | 1,465,280                   | 39.4         |
| <b>Race/ethnicity</b>    |                                            |                       |                               |                    |            |                             |              |
|                          | Indigenous                                 | 1,757                 | 4.4                           | 2,180              | 5.3        | 186,705                     | 5            |
|                          | Chinese                                    | 882                   | 2.2                           | 4,451              | 10.9       | 418,035                     | 11.2         |
|                          | White                                      | 35,026                | 87.5                          | 26,383             | 64.6       | 2,448,155                   | 65.8         |
|                          | South Asian                                | 606                   | 1.5                           | 3,473              | 8.5        | 280,470                     | 7.5          |
|                          | Other                                      | 1,766                 | 4.4                           | 4,352              | 10.7       | 386,495                     | 10.4         |
|                          | Missing/Unknown                            | 1,338                 | n/a                           | n/a                | n/a        | n/a                         | n/a          |
| <b>Health region</b>     |                                            |                       |                               |                    |            |                             |              |
|                          | Fraser Health                              | 8,451                 | 26.1                          | 11,793             | 36.2       | 1,347,410                   | 36.2         |
|                          | Interior Health                            | 6,143                 | 19.0                          | 5,336              | 16.4       | 595,105                     | 16           |
|                          | Northern Island                            | 1,825                 | 5.6                           | 1,828              | 5.6        | 213,235                     | 5.7          |
|                          | Vancouver Coastal                          | 7,315                 | 22.6                          | 8,118              | 24.9       | 934,055                     | 25.1         |
|                          | Vancouver Island                           | 8,640                 | 26.7                          | 5,535              | 17.0       | 630,055                     | 16.9         |
|                          | Missing/Unknown                            | 9,001                 | n/a                           | n/a                | n/a        | n/a                         | n/a          |
| <b>Education</b>         |                                            |                       |                               |                    |            |                             |              |
|                          | Below high school                          | 807                   | 2.5                           | 1,096              | 3.0        | 2,301,030                   | 12.5         |
|                          | Below bachelor                             | 16,928                | 51.7                          | 15,176             | 47.0       | 466,295                     | 61.9         |
|                          | University degree                          | 15,029                | 45.9                          | 16,273             | 50.0       | 952,535                     | 25.6         |
|                          | Missing/Unknown                            | 8,611                 | n/a                           | n/a                | n/a        | n/a                         | n/a          |
| <b>Employment status</b> |                                            |                       |                               |                    |            |                             |              |
|                          | Employed full-time (30 hours or more/week) | 10,654                | 32.0                          | 13,608             | 40.8       | n/a                         | n/a          |
|                          | Employed part-time                         | 2,993                 | 9.0                           | 3,131              | 9.4        | n/a                         | n/a          |

|  |                                      | Survey                |                               |                    |            | British Columbia population |              |
|--|--------------------------------------|-----------------------|-------------------------------|--------------------|------------|-----------------------------|--------------|
|  |                                      | Un-weighted frequency | Un-weighted % (excl. missing) | Weighted frequency | Weighted % | Population frequency        | Population % |
|  | Self-employed                        | 2,704                 | 8.1                           | 3,013              | 9.0        | n/a                         | n/a          |
|  | Unemployed but looking for a job     | 952                   | 2.9                           | 1,522              | 4.6        | n/a                         | n/a          |
|  | Unemployed and not looking for a job | 406                   | 1.2                           | 510                | 1.5        | n/a                         | n/a          |
|  | Full-time parent, homemaker          | 879                   | 2.6                           | 740                | 2.2        | n/a                         | n/a          |
|  | Retired                              | 12,757                | 38.3                          | 8,096              | 24.3       | n/a                         | n/a          |
|  | Student/Pupil                        | 566                   | 1.7                           | 1,197              | 3.6        | n/a                         | n/a          |
|  | Long-term sick or disabled           | 968                   | 2.9                           | 914                | 2.7        | n/a                         | n/a          |
|  | Prefer not to answer                 | 424                   | 1.3                           | 619                | 1.9        | n/a                         | n/a          |
|  | Missing/Unknown                      | 8,072                 | n/a                           | n/a                | n/a        | n/a                         | n/a          |
|  | <b>Material Deprivation Index</b>    |                       |                               |                    |            |                             |              |
|  | 1 (Privileged)                       | 6,407                 | 22.3                          | 6,100              | 21.8       | n/a                         | n/a          |
|  | 2                                    | 6,475                 | 22.5                          | 5,873              | 21.1       | n/a                         | n/a          |
|  | 3                                    | 6,972                 | 24.2                          | 6,010              | 21.6       | n/a                         | n/a          |
|  | 4                                    | 4,822                 | 16.8                          | 5,187              | 18.7       | n/a                         | n/a          |
|  | 5 (Deprived)                         | 4,085                 | 14.2                          | 4,656              | 16.8       | n/a                         | n/a          |
|  | Missing                              | 1,2614                | n/a                           | n/a                | n/a        | n/a                         | n/a          |
|  | <b>Follow up consent</b>             |                       |                               |                    |            |                             |              |
|  | Yes                                  | 20,633                | 63.8                          | 19,051             | 58.9       | n/a                         | n/a          |
|  | No                                   | 11,689                | 36.2                          | 13,275             | 41.1       | n/a                         | n/a          |
|  | Missing                              | 9,053                 | n/a                           | n/a                | n/a        | n/a                         | n/a          |
|  | <b>Data linkage consent</b>          |                       |                               |                    |            |                             |              |
|  | Yes                                  | 7,290                 | 27.3                          | 7,318              | 26.4       | n/a                         | n/a          |
|  | No                                   | 19,467                | 72.8                          | 20,362             | 73.6       | n/a                         | n/a          |
|  | Missing                              | 14,618                | n/a                           | n/a                | n/a        | n/a                         | n/a          |

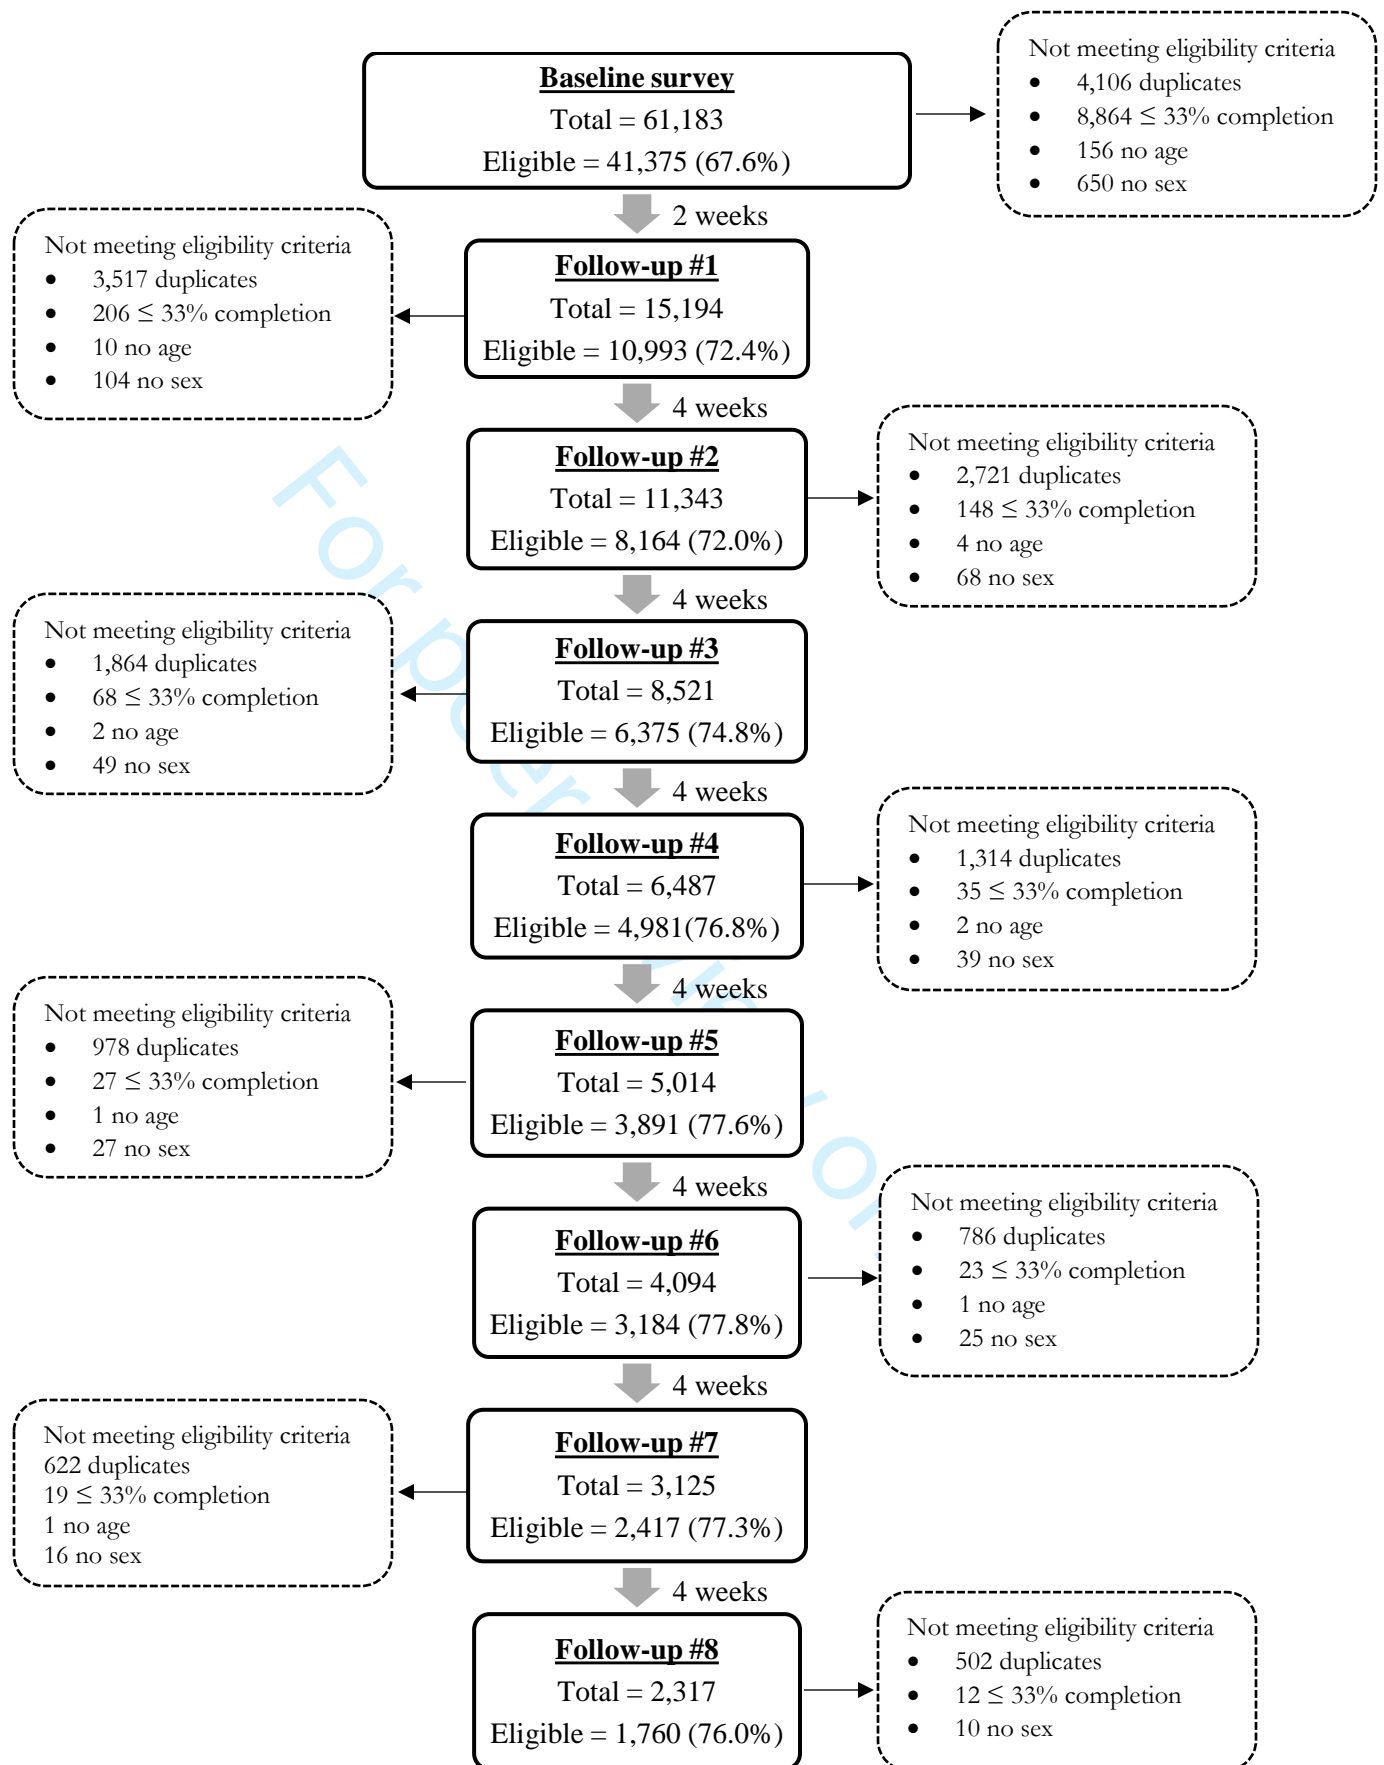

## Supplementary files

### Quantifying contact patterns: development and characteristics of the British Columbia COVID-19 population mixing patterns survey (BC-Mix)

Prince A. Adu<sup>1,2</sup>, Mawuena Binka<sup>1</sup>, Bushra Mahmood,<sup>3</sup> Dahn Jeong<sup>1,2</sup>, Terri Buller-Taylor<sup>1</sup>, Makuza Jean Damascene<sup>1,2</sup>, Sarafa Iyaniwura<sup>1,4</sup>, Notice Ringa<sup>1,2</sup>, Héctor A. Velásquez García<sup>1,2</sup>, Stanley Wong<sup>1</sup>, Amanda Yu<sup>1</sup>, Sofia Bartlett<sup>1,6</sup>, James Wilton<sup>1</sup>, Mike A. Irvine<sup>1,7</sup>, Michael Otterstatter<sup>1,2</sup>, Naveed Z. Janjua<sup>1,2,8</sup>

<sup>1</sup>British Columbia Centre for Disease Control, Vancouver, British Columbia, Canada

<sup>2</sup>School of Population and Public Health, University of British Columbia, Vancouver, British Columbia, Canada

<sup>3</sup>Department of Medicine, University of British Columbia, Vancouver, British Columbia, Canada

<sup>4</sup>Department of Mathematics and Institute of Applied Mathematics, University of British Columbia, Vancouver, British Columbia, Canada

<sup>5</sup>Faculty of Health Sciences, Simon Fraser University, Burnaby, British Columbia, Canada

<sup>6</sup>Department of Pathology and Laboratory Medicine, Vancouver, British Columbia, Canada

<sup>7</sup>Faculty of Health Sciences, Simon Fraser University, Burnaby, British Columbia, Canada

<sup>8</sup>Centre for Health Evaluation & Outcome Sciences, St. Paul's Hospital, Vancouver, British Columbia, Canada



**S1 Table:** BC-Mix variable names and definitions

| Domain                                    | Variable                                                                                                                          | Definition                                                                                                                                                                                                                                                                                                                                                                                                                                                                                                                                                                                                                                              | Included in follow up? (Yes/No)          |
|-------------------------------------------|-----------------------------------------------------------------------------------------------------------------------------------|---------------------------------------------------------------------------------------------------------------------------------------------------------------------------------------------------------------------------------------------------------------------------------------------------------------------------------------------------------------------------------------------------------------------------------------------------------------------------------------------------------------------------------------------------------------------------------------------------------------------------------------------------------|------------------------------------------|
| Demographic information                   |                                                                                                                                   |                                                                                                                                                                                                                                                                                                                                                                                                                                                                                                                                                                                                                                                         | Yes (First name, last name, E-mail only) |
|                                           | Age, sex, gender, ethnicity, first name, last name, personal health number, postal code, employment status, education, occupation | Age, sex, gender, ethnicity, first name, last name, E-mail, personal health number, postal code, employment status, education, occupation of respondent                                                                                                                                                                                                                                                                                                                                                                                                                                                                                                 |                                          |
|                                           | Number of adults living in respondent's household                                                                                 | How many adults live in your household?                                                                                                                                                                                                                                                                                                                                                                                                                                                                                                                                                                                                                 |                                          |
|                                           | Number of children living in respondent's household                                                                               | How many children (under 18 years) live in your household?                                                                                                                                                                                                                                                                                                                                                                                                                                                                                                                                                                                              |                                          |
| Perceptions and attitudes around COVID-19 |                                                                                                                                   |                                                                                                                                                                                                                                                                                                                                                                                                                                                                                                                                                                                                                                                         | No                                       |
|                                           | Satisfaction with provincial COVID-19 response                                                                                    | How satisfied are you with how COVID-19 has been managed in the province?                                                                                                                                                                                                                                                                                                                                                                                                                                                                                                                                                                               |                                          |
|                                           | Knowledge of COVID-19                                                                                                             | How much do you know about COVID-19?                                                                                                                                                                                                                                                                                                                                                                                                                                                                                                                                                                                                                    |                                          |
|                                           | Attitude to COVID-19 #1                                                                                                           | To what extent do you agree or disagree with the following statements? - 1) COVID-19 would be a serious illness for me if I caught it 2) I think I am likely to catch COVID-19 3) If I don't follow government advice, I might spread COVID-19 to someone who is vulnerable. 4) My boss expects me to work when I am feeling unwell or sick 5) If I could not work because of COVID-19, I would still get paid 6) If I had to isolate myself for 14 days because of COVID-19, I would have enough food and supplies for 14 days 7) If I had to isolate myself for 14 days because of COVID-19... - Someone else would be able to look after my children |                                          |
|                                           | Attitude to COVID-19 #2                                                                                                           | How effective do you think the following are at slowing the spread of COVID-19? -1) Meeting up with fewer people than normal 2) Avoiding crowded spaces 3) Staying at home for 14 days if you have ... - Severe symptoms (e.g., severe cough or high temperature).                                                                                                                                                                                                                                                                                                                                                                                      |                                          |
|                                           | Attitude to COVID-19 #3                                                                                                           | How much, if at all, have you changed the number of face-to-face interactions with other people as a result of the COVID19 pandemic?                                                                                                                                                                                                                                                                                                                                                                                                                                                                                                                    |                                          |
|                                           | Attitude to COVID-19 #4                                                                                                           | How well do you think you are doing at keeping physically distanced from people outside your home?                                                                                                                                                                                                                                                                                                                                                                                                                                                                                                                                                      |                                          |
|                                           | Attitude to COVID-19 #5                                                                                                           | How concerned are you personally about the spread of COVID19?                                                                                                                                                                                                                                                                                                                                                                                                                                                                                                                                                                                           |                                          |
| Attitude toward COVID-19 vaccine          |                                                                                                                                   |                                                                                                                                                                                                                                                                                                                                                                                                                                                                                                                                                                                                                                                         | Yes                                      |
|                                           | Vaccination status (1st or 2nd shot)                                                                                              | Have you received the COVID-19 vaccine (either 1st or 2nd shot)?                                                                                                                                                                                                                                                                                                                                                                                                                                                                                                                                                                                        |                                          |
|                                           | Date of 1st shot                                                                                                                  | When did you receive your 1st COVID-19 vaccine shot?                                                                                                                                                                                                                                                                                                                                                                                                                                                                                                                                                                                                    |                                          |
|                                           | Vaccination status (2nd shot)                                                                                                     | Have you received your 2nd COVID-19 vaccine shot?                                                                                                                                                                                                                                                                                                                                                                                                                                                                                                                                                                                                       |                                          |

|                                                               |                           |                                                                                                                                                                                                                                                                                                                                                                                                                             |     |
|---------------------------------------------------------------|---------------------------|-----------------------------------------------------------------------------------------------------------------------------------------------------------------------------------------------------------------------------------------------------------------------------------------------------------------------------------------------------------------------------------------------------------------------------|-----|
|                                                               | Date of 2nd shot          | When did you receive your 2nd COVID-19 vaccine shot?                                                                                                                                                                                                                                                                                                                                                                        |     |
|                                                               | Perceived risk            | I believe I am at risk of becoming infected with COVID-19.                                                                                                                                                                                                                                                                                                                                                                  |     |
|                                                               | Perceived susceptibility  | With the way my life is, I believe I am at a high risk of getting COVID-19 (e.g., risks at my work, recreational activities, people I live with, etc.)                                                                                                                                                                                                                                                                      |     |
|                                                               | Perceived protection 1    | I believe a COVID-19 Vaccine will protect me from getting the virus.                                                                                                                                                                                                                                                                                                                                                        |     |
|                                                               | Perceived protection 2    | I believe a COVID-19 vaccine will decrease my chance of getting seriously ill from COVID-19.                                                                                                                                                                                                                                                                                                                                |     |
|                                                               | Trust                     | I do not trust the COVID-19 vaccine.                                                                                                                                                                                                                                                                                                                                                                                        |     |
|                                                               | Effectiveness             | I am concerned about the effectiveness of the COVID-19 vaccination.                                                                                                                                                                                                                                                                                                                                                         |     |
|                                                               | Safety                    | I am concerned about the safety of the COVID-19 vaccination.                                                                                                                                                                                                                                                                                                                                                                |     |
|                                                               | Subjective norm 1         | Most of the people I know are getting or have received the COVID-19 vaccine.                                                                                                                                                                                                                                                                                                                                                |     |
|                                                               | Subjective norm 2         | Most of the people who are important to me (my family, relatives and/or friends) think I should get the COVID-19 vaccine.                                                                                                                                                                                                                                                                                                   |     |
|                                                               | Access                    | If I choose to get the COVID-19 vaccine, I believe it will be easy to get it.                                                                                                                                                                                                                                                                                                                                               |     |
|                                                               | Intention                 | I plan to get the COVID-19 vaccine.                                                                                                                                                                                                                                                                                                                                                                                         |     |
| COVID-19 testing and results, symptoms, and health behaviours |                           |                                                                                                                                                                                                                                                                                                                                                                                                                             | Yes |
|                                                               | COVID symptoms            | Since, January 2020, have you had any of the following symptoms? Check all that apply: headache, fever, stuffy nose/congestion, loss of smell or taste, new or worsening cough, difficulty breathing/shortness of breath, confusion, vomiting, chills, weakness, muscle pain, fatigue, nausea, diarrhea                                                                                                                     |     |
|                                                               | Date of first symptoms    | When did your first symptom start? (date)                                                                                                                                                                                                                                                                                                                                                                                   |     |
|                                                               | Action following symptoms | Have you done any of the following for these symptoms? (Please check all that apply). Called family doctor/ GP, visited family doctor's /GP office, visited community/public health clinic, been admitted to hospital etc.                                                                                                                                                                                                  |     |
|                                                               | Actions before symptoms   | Before these symptoms, had you been in close contact with anyone who either: (A) had any of those symptoms [fever, new or worsening cough, headache, chills, weakness, muscle pain, stuffy nose/congestion, sore throat, difficulty breathing/shortness of breath, nausea, diarrhea, fatigue, loss of smell or taste, confusion, vomiting]; OR (B) was diagnosed positive for COVID-19 within 14 days before you felt sick? |     |
|                                                               | Isolation before symptoms | Did you isolate, or stay away from your workplace or educational facility?                                                                                                                                                                                                                                                                                                                                                  |     |
|                                                               | COVID-19 test             | Have you been tested for COVID-19?                                                                                                                                                                                                                                                                                                                                                                                          |     |
|                                                               | Test results              | Did you test positive for COVID-19?                                                                                                                                                                                                                                                                                                                                                                                         |     |

|                                                     |                               |                                                                                                                                                                                                                                                                                                                                                                    |     |
|-----------------------------------------------------|-------------------------------|--------------------------------------------------------------------------------------------------------------------------------------------------------------------------------------------------------------------------------------------------------------------------------------------------------------------------------------------------------------------|-----|
|                                                     | Household symptoms            | Has anyone in your household either: (A) had any of the following symptoms: fever, new or worsening cough, headache, chills, weakness, muscle pain, stuffy nose/congestion, sore throat, difficulty breathing/shortness of breath, nausea, diarrhea, fatigue, loss of smell or taste, confusion, vomiting; OR (B) tested positive for COVID-19 since January 2020? |     |
|                                                     | First symptoms date           | When did their first symptom start? If you don't remember, please make your best guess.                                                                                                                                                                                                                                                                            |     |
|                                                     | Household isolation           | Has anyone in your household been told to quarantine, isolate, or limit time at their school or workplace since January 2020 because: they were sick or exposed to someone with COVID-19?                                                                                                                                                                          |     |
|                                                     | Adherence                     | Did they follow the advice and isolate, quarantine, or stay away from their workplace or educational facility?                                                                                                                                                                                                                                                     |     |
| Activities and behaviour in and outside of the home |                               |                                                                                                                                                                                                                                                                                                                                                                    | Yes |
|                                                     | Movement out of home          | How many times did you leave your home (or property, apartment) yesterday?                                                                                                                                                                                                                                                                                         |     |
|                                                     | Place of movement             | Where did you go when you left your home? (Check all that apply) - Another person's home, a workplace, a hospital, doctor's office etc.                                                                                                                                                                                                                            |     |
|                                                     | Distance                      | What is the farthest distance that you went from your home yesterday?                                                                                                                                                                                                                                                                                              |     |
|                                                     | Means of transport            | How did you travel when you left your home? (Check all that apply) - Selected Choice - I only walked (I did not use other transportation)                                                                                                                                                                                                                          |     |
|                                                     | Face mask use                 | Did you use a face mask yesterday?                                                                                                                                                                                                                                                                                                                                 |     |
|                                                     | Face mask use location        | Where did you use your face mask yesterday? (Check all that apply) - Selected Choice - Everywhere outside my house                                                                                                                                                                                                                                                 |     |
|                                                     | Mask use duration             | Take your best guess for the total amount of time you wore a mask yesterday (hours and minutes)?                                                                                                                                                                                                                                                                   |     |
|                                                     | Presence at home              | In the last 3 hours, have you been in your home?                                                                                                                                                                                                                                                                                                                   |     |
|                                                     | Handwashing                   | In the last 3 hours, have many times did you wash your hands with soap?                                                                                                                                                                                                                                                                                            |     |
|                                                     | Hand sanitizer                | In the last 3 hours, how many times did you use hand sanitizer?                                                                                                                                                                                                                                                                                                    |     |
|                                                     | Transport type                | Yesterday, which type of public transportation did you use? (Please check all that apply) - Selected Choice - Airplane, bus, taxi etc                                                                                                                                                                                                                              |     |
|                                                     | Transport duration            | Yesterday, for about how long were you on public transportation?                                                                                                                                                                                                                                                                                                   |     |
|                                                     | PPE use during transportation | Yesterday, did you wear any of the following while on public transportation? (Please check all that apply) - Selected Choice - A face mask or other covering over your nose and mouth (e.g., face shield, bandana), gloves, etc.                                                                                                                                   |     |
|                                                     | Travel outside Canada         | Have you travelled outside Canada at all since Jan 2020? And if so, to where? - Selected Choice                                                                                                                                                                                                                                                                    |     |

|                                                     |                                                                                                                                                                                                       |                                                                                                                                                                                                                                                                                                                                                                                                                                                                                                                                                                                                                                                                |     |
|-----------------------------------------------------|-------------------------------------------------------------------------------------------------------------------------------------------------------------------------------------------------------|----------------------------------------------------------------------------------------------------------------------------------------------------------------------------------------------------------------------------------------------------------------------------------------------------------------------------------------------------------------------------------------------------------------------------------------------------------------------------------------------------------------------------------------------------------------------------------------------------------------------------------------------------------------|-----|
|                                                     | Number of contacts                                                                                                                                                                                    | Now we would like to ask you some questions about people you had in-person, face-to-face contact with yesterday. By in-person, face-to-face contact, we mean EITHER: A. An in-person two-way conversation with three or more words OR B. Physical skin-to-skin contact (for example, a handshake, hug, kiss, or contact sports). This includes family members, friends, co-workers, people you spoke to in shops, bus drivers, strangers, etc... and people of ALL ages. Please do not count people you contacted only with things like telephone, text, or online. How many people did you have in-person contact with between 5 am yesterday and 5 am today? |     |
|                                                     | Contact identifier #1 to #10                                                                                                                                                                          | Please add a non-identifying "nickname" for each of the people you had face-to-face or physical contact with (e.g., DG, checkout person, bus driver, child #2). This "nickname" will help you to answer questions about this contact. - 1st person label                                                                                                                                                                                                                                                                                                                                                                                                       |     |
|                                                     | Characteristics of contact #1 (gender, age, relationship to respondent)                                                                                                                               | For the people you "nicknamed" and had in-person contact with between 5am yesterday and 5am today... - I believe this person identifies as... [indicate gender, age, relationship to you, location of contact,                                                                                                                                                                                                                                                                                                                                                                                                                                                 |     |
|                                                     | Characteristics of contact #2                                                                                                                                                                         | Distance during contact, duration of contact, contact prior to COVID-19, PPE use during contact, distance during contact)                                                                                                                                                                                                                                                                                                                                                                                                                                                                                                                                      |     |
|                                                     | Location of contact of 10+ contacts                                                                                                                                                                   | You said you had more than 10 in-person contacts. Where did majority of these contacts take place?                                                                                                                                                                                                                                                                                                                                                                                                                                                                                                                                                             |     |
|                                                     | Occupational setting of 10+ contact                                                                                                                                                                   | You said you had more than 10 in-person contacts. Which of these best describes your work/occupation or the other person's workplace where these contacts took place?                                                                                                                                                                                                                                                                                                                                                                                                                                                                                          |     |
|                                                     | Age-group of contacts of 10+ contacts                                                                                                                                                                 | You said you had more than 10 in-person contacts. What was the age-group for most of these contacts you interacted with?                                                                                                                                                                                                                                                                                                                                                                                                                                                                                                                                       |     |
|                                                     | Duration of 10+ contact                                                                                                                                                                               | You said you had more than 10 in-person contacts. For most of these contacts, about how long did each contact last?                                                                                                                                                                                                                                                                                                                                                                                                                                                                                                                                            |     |
| Internet and social media use and other information |                                                                                                                                                                                                       |                                                                                                                                                                                                                                                                                                                                                                                                                                                                                                                                                                                                                                                                | No  |
|                                                     | Internet use                                                                                                                                                                                          | About how often do you use the internet?                                                                                                                                                                                                                                                                                                                                                                                                                                                                                                                                                                                                                       |     |
|                                                     | Social media use                                                                                                                                                                                      | Thinking about the social media sites that you use; about how often do you visit or use each of the following? - Facebook, Instagram, Twitter, Snapchat, YouTube                                                                                                                                                                                                                                                                                                                                                                                                                                                                                               |     |
|                                                     | Survey start date, survey end date, IP address, survey duration, response ID, recorded date, respondent's first and last name, location latitude, location longitude, follow up consent, draw consent | Survey start date, survey end date, IP address, survey duration, response ID, recorded date, respondent's first and last name, location latitude, location longitude, follow up consent, draw consent                                                                                                                                                                                                                                                                                                                                                                                                                                                          |     |
| <b>Derived variables</b>                            |                                                                                                                                                                                                       |                                                                                                                                                                                                                                                                                                                                                                                                                                                                                                                                                                                                                                                                | Yes |

|    |                           |                                                                                                                                                                                                                                                                                                                                                                                                                                                                                                                                                                     |  |
|----|---------------------------|---------------------------------------------------------------------------------------------------------------------------------------------------------------------------------------------------------------------------------------------------------------------------------------------------------------------------------------------------------------------------------------------------------------------------------------------------------------------------------------------------------------------------------------------------------------------|--|
| 1  |                           |                                                                                                                                                                                                                                                                                                                                                                                                                                                                                                                                                                     |  |
| 2  |                           |                                                                                                                                                                                                                                                                                                                                                                                                                                                                                                                                                                     |  |
| 3  |                           |                                                                                                                                                                                                                                                                                                                                                                                                                                                                                                                                                                     |  |
| 4  | Health Authority          | The health authority of respondent. This was derived using respondents postal code or location data.                                                                                                                                                                                                                                                                                                                                                                                                                                                                |  |
| 5  |                           |                                                                                                                                                                                                                                                                                                                                                                                                                                                                                                                                                                     |  |
| 6  | Quebec material index     | The material deprivation involves deprivation of the goods and conveniences that are part of modern life, such as adequate housing, possession of a car, access to high-speed internet, or a neighbourhood with recreational areas. This deprivation marks the consequences of lack of material resources associated with low education, insecure job situation and insufficient income (1,2).                                                                                                                                                                      |  |
| 7  |                           |                                                                                                                                                                                                                                                                                                                                                                                                                                                                                                                                                                     |  |
| 8  |                           |                                                                                                                                                                                                                                                                                                                                                                                                                                                                                                                                                                     |  |
| 9  |                           |                                                                                                                                                                                                                                                                                                                                                                                                                                                                                                                                                                     |  |
| 10 |                           |                                                                                                                                                                                                                                                                                                                                                                                                                                                                                                                                                                     |  |
| 11 |                           |                                                                                                                                                                                                                                                                                                                                                                                                                                                                                                                                                                     |  |
| 12 |                           |                                                                                                                                                                                                                                                                                                                                                                                                                                                                                                                                                                     |  |
| 13 |                           |                                                                                                                                                                                                                                                                                                                                                                                                                                                                                                                                                                     |  |
| 14 | Quebec social index       | Social deprivation refers to a fragile social network, starting with the family and encompassing the community. It is characterized by individuals living alone, being a lone parent and being separated, divorced, or widowed (1,2).                                                                                                                                                                                                                                                                                                                               |  |
| 15 |                           |                                                                                                                                                                                                                                                                                                                                                                                                                                                                                                                                                                     |  |
| 16 |                           |                                                                                                                                                                                                                                                                                                                                                                                                                                                                                                                                                                     |  |
| 17 |                           |                                                                                                                                                                                                                                                                                                                                                                                                                                                                                                                                                                     |  |
| 18 |                           |                                                                                                                                                                                                                                                                                                                                                                                                                                                                                                                                                                     |  |
| 19 | Ethnocultural composition | Ethno-cultural composition refers to the community make-up of immigrant populations, and at the British Columbia-level takes into consideration factors such as the proportion of population who self-identify as visible minority, the proportion of population that is foreign-born, the proportion of population with no knowledge of either official language (linguistic isolation), and the proportion of population who are recent immigrants (arrived in five years prior to Census). (1)                                                                   |  |
| 20 |                           |                                                                                                                                                                                                                                                                                                                                                                                                                                                                                                                                                                     |  |
| 21 |                           |                                                                                                                                                                                                                                                                                                                                                                                                                                                                                                                                                                     |  |
| 22 |                           |                                                                                                                                                                                                                                                                                                                                                                                                                                                                                                                                                                     |  |
| 23 |                           |                                                                                                                                                                                                                                                                                                                                                                                                                                                                                                                                                                     |  |
| 24 |                           |                                                                                                                                                                                                                                                                                                                                                                                                                                                                                                                                                                     |  |
| 25 |                           |                                                                                                                                                                                                                                                                                                                                                                                                                                                                                                                                                                     |  |
| 26 |                           |                                                                                                                                                                                                                                                                                                                                                                                                                                                                                                                                                                     |  |
| 27 |                           |                                                                                                                                                                                                                                                                                                                                                                                                                                                                                                                                                                     |  |
| 28 |                           |                                                                                                                                                                                                                                                                                                                                                                                                                                                                                                                                                                     |  |
| 29 | Situational vulnerability | Situational vulnerability speaks to variations in socio-demographic conditions in the areas of housing and education, while taking into account other demographic characteristics. The indicators in this dimension at the British Columbia-level measure concepts such as the proportion of population that identifies as Aboriginal, the proportion of population aged 25-64 without a high school diploma, the proportion of dwellings needing major repairs, the proportion of population that is low-income, and the proportion of single parent families (1). |  |
| 30 |                           |                                                                                                                                                                                                                                                                                                                                                                                                                                                                                                                                                                     |  |
| 31 |                           |                                                                                                                                                                                                                                                                                                                                                                                                                                                                                                                                                                     |  |
| 32 |                           |                                                                                                                                                                                                                                                                                                                                                                                                                                                                                                                                                                     |  |
| 33 |                           |                                                                                                                                                                                                                                                                                                                                                                                                                                                                                                                                                                     |  |
| 34 |                           |                                                                                                                                                                                                                                                                                                                                                                                                                                                                                                                                                                     |  |
| 35 |                           |                                                                                                                                                                                                                                                                                                                                                                                                                                                                                                                                                                     |  |
| 36 |                           |                                                                                                                                                                                                                                                                                                                                                                                                                                                                                                                                                                     |  |
| 37 |                           |                                                                                                                                                                                                                                                                                                                                                                                                                                                                                                                                                                     |  |
| 38 |                           |                                                                                                                                                                                                                                                                                                                                                                                                                                                                                                                                                                     |  |
| 39 |                           |                                                                                                                                                                                                                                                                                                                                                                                                                                                                                                                                                                     |  |
| 40 | Economic dependency       | Economic dependency relates to reliance on the workforce, or a dependence on sources of income other than employment income. Indicators included in this dimension at the British Columbia-level measure concepts such as the proportion of population participating in labour force (aged 15 and older), the proportion of population aged 65 and older, the ratio of employment to population, and the dependency ratio (population aged 0-14 and aged 65 and older divided by population aged 15-64)(1).                                                         |  |
| 41 |                           |                                                                                                                                                                                                                                                                                                                                                                                                                                                                                                                                                                     |  |
| 42 |                           |                                                                                                                                                                                                                                                                                                                                                                                                                                                                                                                                                                     |  |
| 43 |                           |                                                                                                                                                                                                                                                                                                                                                                                                                                                                                                                                                                     |  |
| 44 |                           |                                                                                                                                                                                                                                                                                                                                                                                                                                                                                                                                                                     |  |
| 45 |                           |                                                                                                                                                                                                                                                                                                                                                                                                                                                                                                                                                                     |  |
| 46 |                           |                                                                                                                                                                                                                                                                                                                                                                                                                                                                                                                                                                     |  |
| 47 |                           |                                                                                                                                                                                                                                                                                                                                                                                                                                                                                                                                                                     |  |
| 48 |                           |                                                                                                                                                                                                                                                                                                                                                                                                                                                                                                                                                                     |  |
| 49 |                           |                                                                                                                                                                                                                                                                                                                                                                                                                                                                                                                                                                     |  |
| 50 |                           |                                                                                                                                                                                                                                                                                                                                                                                                                                                                                                                                                                     |  |
| 51 | Residential instability   | Residential instability speaks to the tendency of neighbourhood inhabitants to fluctuate over time, taking into consideration both housing and familial characteristics. The indicators in this dimension at the British Columbia-level measure concepts such as the proportion of dwellings that are apartment buildings, the proportion of persons living alone,                                                                                                                                                                                                  |  |
| 52 |                           |                                                                                                                                                                                                                                                                                                                                                                                                                                                                                                                                                                     |  |
| 53 |                           |                                                                                                                                                                                                                                                                                                                                                                                                                                                                                                                                                                     |  |
| 54 |                           |                                                                                                                                                                                                                                                                                                                                                                                                                                                                                                                                                                     |  |
| 55 |                           |                                                                                                                                                                                                                                                                                                                                                                                                                                                                                                                                                                     |  |
| 56 |                           |                                                                                                                                                                                                                                                                                                                                                                                                                                                                                                                                                                     |  |
| 57 |                           |                                                                                                                                                                                                                                                                                                                                                                                                                                                                                                                                                                     |  |
| 58 |                           |                                                                                                                                                                                                                                                                                                                                                                                                                                                                                                                                                                     |  |
| 59 |                           |                                                                                                                                                                                                                                                                                                                                                                                                                                                                                                                                                                     |  |
| 60 |                           |                                                                                                                                                                                                                                                                                                                                                                                                                                                                                                                                                                     |  |

|  |  |                                                                                                                            |  |
|--|--|----------------------------------------------------------------------------------------------------------------------------|--|
|  |  | the proportion of dwellings that are owned, and the proportion of the population who moved within the past five years (1). |  |
|--|--|----------------------------------------------------------------------------------------------------------------------------|--|

### References

1. Government of Canada SC. Canadian Index of Multiple Deprivation: Dataset [Internet]. 2019 [cited 2021 Jun 10]. Available from: <https://www150.statcan.gc.ca/n1/pub/45-20-0001/452000012019002-eng.htm>
2. Bureau d'information et d'études En Santé Des Populations (BIESP). Deprivation Index [Internet]. INSPQ. 2019 [cited 2021 May 27]. Available from: <https://www.inspq.qc.ca/en/deprivation/material-and-social-deprivation-index>

For peer review only

**S2 Table.** Comparison of baseline eligible and ineligible participants, frequencies and proportions

|                   |                                                  | Eligible (n=41,375) |                               |                               | Ineligible (n=15, 702) ‡ |                               |                               |
|-------------------|--------------------------------------------------|---------------------|-------------------------------|-------------------------------|--------------------------|-------------------------------|-------------------------------|
|                   |                                                  | Frequency           | Percent<br>(incl.<br>missing) | Percent<br>(excl.<br>missing) | Frequency                | Percent<br>(incl.<br>missing) | Percent<br>(excl.<br>missing) |
| Sex               |                                                  |                     |                               |                               |                          |                               |                               |
|                   | Male                                             | 6,823               | 16.5                          | 16.5                          | 1,697                    | 10.8                          | 18.6                          |
|                   | Female                                           | 34,552              | 83.5                          | 83.5                          | 7,442                    | 47.4                          | 81.4                          |
|                   | Missing                                          | n/a                 | n/a                           | n/a                           | 6,563                    | 41.8                          | n/a                           |
| Age               |                                                  |                     |                               |                               |                          |                               |                               |
|                   | 18-34                                            | 4,978               | 12.0                          | 12.0                          | 1,726                    | 11.0                          | 17.7                          |
|                   | 35-54                                            | 12,110              | 29.3                          | 29.3                          | 3,039                    | 19.4                          | 31.2                          |
|                   | 55+                                              | 24,287              | 58.7                          | 58.7                          | 4,981                    | 31.7                          | 51.1                          |
|                   | Missing                                          | n/a                 | n/a                           | n/a                           | 5,956                    | 37.9                          | n/a                           |
| Race/ethnicity    |                                                  |                     |                               |                               |                          |                               |                               |
|                   | Indigenous                                       | 1,757               | 4.3                           | 4.4                           | 666                      | 4.2                           | 7.2                           |
|                   | Chinese                                          | 882                 | 2.1                           | 2.2                           | 238                      | 1.5                           | 2.6                           |
|                   | White                                            | 35,026              | 84.7                          | 87.5                          | 7,439                    | 47.4                          | 79.9                          |
|                   | South Asian                                      | 606                 | 1.5                           | 1.5                           | 315                      | 2.0                           | 3.4                           |
|                   | Other                                            | 1,766               | 4.3                           | 4.4                           | 649                      | 4.1                           | 7.0                           |
|                   | Missing/Unknown                                  | 1,338               | 3.2                           | n/a                           | 6,395                    | 40.7                          | n/a                           |
| Health region     |                                                  |                     |                               |                               |                          |                               |                               |
|                   | Fraser Health                                    | 8,451               | 20.4                          | 26.1                          | 1,802                    | 11.5                          | 31.0                          |
|                   | Interior Health                                  | 6,143               | 14.8                          | 19.0                          | 1,061                    | 6.8                           | 18.3                          |
|                   | Northern Island                                  | 1,825               | 4.4                           | 5.6                           | 312                      | 2.0                           | 5.4                           |
|                   | Vancouver Coastal                                | 7,315               | 17.7                          | 22.6                          | 1,329                    | 8.5                           | 22.9                          |
|                   | Vancouver Island                                 | 8,640               | 20.9                          | 26.7                          | 1,300                    | 8.3                           | 22.4                          |
|                   | Missing                                          | 9,001               | 21.8                          | n/a                           | 9,898                    | 63.0                          | n/a                           |
| Education         |                                                  |                     |                               |                               |                          |                               |                               |
|                   | Below high school                                | 807                 | 2.0                           | 2.5                           | 41                       | 0.3                           | 7.1                           |
|                   | Below bachelor                                   | 16,928              | 40.9                          | 51.7                          | 245                      | 1.6                           | 42.5                          |
|                   | University degree                                | 15,029              | 36.3                          | 45.9                          | 290                      | 1.8                           | 50.3                          |
|                   | Missing/Unknown                                  | 8,611               | 20.8                          | n/a                           | 15,126                   | 96.3                          | n/a                           |
| Employment status |                                                  |                     |                               |                               |                          |                               |                               |
|                   | Employed full-time<br>(30 hours or<br>more/week) | 10,654              | 25.7                          | 32.0                          | 210                      | 1.2                           | 31.6                          |
|                   | Employed part-time                               | 2,993               | 7.2                           | 9.0                           | 75                       | 0.4                           | 11.3                          |
|                   | Self-employed                                    | 2,704               | 6.5                           | 8.1                           | 64                       | 0.4                           | 9.6                           |



1  
2  
3  
4  
5  
6  
7  
8  
9  
10  
11  
12  
13  
14  
15  
16  
17  
18  
19  
20  
21  
22  
23  
24  
25  
26  
27  
28  
29  
30  
31  
32  
33  
34  
35  
36  
37  
38  
39  
40  
41  
42  
43  
44  
45  
46  
47  
48  
49  
50  
51  
52  
53  
54  
55  
56  
57  
58  
59  
60

|                                   |                                      |        |      |      |        |      |      |
|-----------------------------------|--------------------------------------|--------|------|------|--------|------|------|
|                                   | Unemployed but looking for a job     | 952    | 2.3  | 2.9  | 24     | 0.1  | 3.6  |
|                                   | Unemployed and not looking for a job | 406    | 1.0  | 1.2  | 10     | 0.1  | 1.5  |
|                                   | Full-time parent, homemaker          | 879    | 2.1  | 2.6  | 10     | 0.1  | 1.5  |
|                                   | Retired                              | 12,757 | 30.8 | 38.3 | 87     | 0.5  | 13.1 |
|                                   | Student/Pupil                        | 566    | 1.4  | 1.7  | 67     | 0.4  | 10.1 |
|                                   | Long-term sick or disabled           | 968    | 2.3  | 2.9  | 31     | 0.2  | 4.7  |
|                                   | Prefer not to answer                 | 424    | 1.0  | 1.3  | 87     | 0.5  | 13.1 |
|                                   | Missing/Unknown                      | 8,072  | 19.5 | n/a  | 15,037 | 84.8 | n/a  |
| Quebec Material Deprivation Index |                                      |        |      |      |        |      |      |
|                                   | 1 (Privileged)                       | 6,407  | 15.5 | 22.3 | 690    | 4.4  | 13.8 |
|                                   | 2                                    | 6,475  | 15.6 | 22.5 | 1,041  | 6.6  | 20.9 |
|                                   | 3                                    | 6,972  | 16.9 | 24.2 | 1,538  | 9.8  | 30.8 |
|                                   | 4                                    | 4,822  | 11.7 | 16.8 | 751    | 4.8  | 15.1 |
|                                   | 5 (Deprived)                         | 4,085  | 9.9  | 14.2 | 969    | 6.2  | 19.4 |
|                                   | Missing                              | 12,614 | 30.5 | n/a  | 10,713 | 68.2 | n/a  |
| Quebec Social Deprivation Index   |                                      |        |      |      |        |      |      |
|                                   | 1 (Privileged)                       | 4,932  | 11.9 | 17.2 | 1,018  | 6.5  | 20.4 |
|                                   | 2                                    | 4,756  | 11.5 | 16.5 | 696    | 4.4  | 14.0 |
|                                   | 3                                    | 6,311  | 15.3 | 21.9 | 1,275  | 8.1  | 25.6 |
|                                   | 4                                    | 5,932  | 14.3 | 20.6 | 897    | 5.7  | 18.0 |
|                                   | 5 (Deprived)                         | 6,830  | 16.5 | 23.8 | 1,103  | 7.0  | 22.1 |
|                                   | Missing                              | 12,614 | 30.5 | n/a  | 10,713 | 68.2 | n/a  |
| Follow up consent                 |                                      |        |      |      |        |      |      |
|                                   | Yes                                  | 20,633 | 49.9 | 63.8 | 245    | 1.6  | 39.6 |
|                                   | No                                   | 11,689 | 28.3 | 36.2 | 373    | 2.4  | 60.4 |
|                                   | Missing                              | 9,053  | 21.9 | n/a  | 15,084 | 96.1 | n/a  |
| Data linkage consent              |                                      |        |      |      |        |      |      |
|                                   | Yes                                  | 7,290  | 17.6 | 27.3 | 95     | 0.6  | 17.3 |
|                                   | No                                   | 19,467 | 47.1 | 72.8 | 454    | 2.9  | 82.7 |
|                                   | Missing                              | 14,618 | 35.3 | n/a  | 15,153 | 96.5 | n/a  |

---

‡Does not include 4,106 duplicates

**S3 Table.** Participant profile of BC-Mix follow up surveys: frequencies and proportions (%)

|                           | Follow up #1<br>(n=10,993) | Follow up #2<br>(n=8,164) | Follow up #3<br>(n=6,375) | Follow up #4<br>(n=4,981) | Follow up #5<br>(n=3,891) | Follow up #6<br>(n=3,184) | Follow up #7<br>(n=2,417) | Follow up #8<br>(n=1,760) |
|---------------------------|----------------------------|---------------------------|---------------------------|---------------------------|---------------------------|---------------------------|---------------------------|---------------------------|
| <b>Complete responses</b> | 10619 (96.6)               | 7935 (97.2)               | 6265 (98.3)               | 4906 (98.5)               | 3836 (98.6)               | 3137 (98.5)               | 2397(99.2)                | 1733 (98.5)               |
| <b>Sex</b>                |                            |                           |                           |                           |                           |                           |                           |                           |
| Male                      | 1590 (14.5)                | 1115 (13.7)               | 843 (13.2)                | 646 (13.0)                | 495 (12.7)                | 404 (12.17)               | 312 (12.9)                | 217 (12.3)                |
| Female                    | 9403 (85.5)                | 7049 (86.3)               | 5532 (86.8)               | 4335 (87.0)               | 3396 (87.3)               | 2780 (87.3)               | 2105 (87.1)               | 1543 (87.7)               |
| <b>Age</b>                |                            |                           |                           |                           |                           |                           |                           |                           |
| 18-34                     | 1128 (10.3)                | 731 (9.0)                 | 497 (7.8)                 | 363 (7.3)                 | 257 (6.6)                 | 199 (6.3)                 | 152 (6.3)                 | 109 (6.2)                 |
| 35-54                     | 3013 (27.4)                | 2105 (25.8)               | 1533 (24.1)               | 1127 (22.6)               | 846 (21.7)                | 662 (20.8)                | 495 (20.5)                | 343 (19.5)                |
| 55+                       | 6852 (62.3)                | 5328 (65.3)               | 4345 (68.2)               | 3491 (70.1)               | 2788 (71.7)               | 2323 (73.0)               | 1770 (73.2)               | 1308 (74.3)               |
| <b>Race/ethnicity</b>     |                            |                           |                           |                           |                           |                           |                           |                           |
| Indigenous                | 342 (3.1)                  | 229 (2.8)                 | 162 (2.5)                 | 130 (2.6)                 | 91 (2.3)                  | 71 (2.2)                  | 54 (2.2)                  | 38 (2.2)                  |
| Chinese                   | 199 (1.8)                  | 124 (1.5)                 | 98 (1.5)                  | 66 (1.3)                  | 48 (1.2)                  | 39 (1.2)                  | 25 (1.0)                  | 16 (0.9)                  |
| White                     | 9870 (89.8)                | 7415 (90.8)               | 5833 (91.5)               | 4586 (92.1)               | 3602 (92.6)               | 2959 (92.9)               | 2254 (93.3)               | 1642 (93.3)               |
| South Asian               | 79 (0.7)                   | 39 (0.5)                  | 30 (0.5)                  | 20 (0.4)                  | 15 (0.4)                  | 14 (0.4)                  | 12 (0.5)                  | 12 (0.7)                  |
| Other                     | 316 (2.9)                  | 229 (2.8)                 | 154 (2.4)                 | 108 (2.2)                 | 86 (2.2)                  | 63 (2.0)                  | 45 (1.9)                  | 35 (2.0)                  |
| Missing/Unknown           | 187(1.7)                   | 128 (1.6)                 | 98 (1.5)                  | 71 (1.4)                  | 49 (1.3)                  | 38 (1.2)                  | 27 (1.1)                  | 17 (1.0)                  |
| <b>Health region</b>      |                            |                           |                           |                           |                           |                           |                           |                           |
| Fraser Health             | 2748 (25.0)                | 2039 (25.0)               | 1590 (24.9)               | 1243 (25.0)               | 964 (24.8)                | 792 (24.9)                | 613 (25.4)                | 462 (26.3)                |
| Interior Health           | 1926 (17.5)                | 1435 (17.6)               | 1156 (18.1)               | 907 (18.2)                | 703 (18.1)                | 579 (18.2)                | 432 (17.9)                | 317 (18.0)                |
| Northern Island           | 506 (4.6)                  | 374 (4.6)                 | 280 (4.4)                 | 212 (4.3)                 | 162 (4.2)                 | 116 (3.4)                 | 88 (3.6)                  | 63 (3.6)                  |
| Vancouver Coastal         | 2706 (24.6)                | 1992 (24.4)               | 1540 (24.2)               | 1178 (23.7)               | 932 (24.0)                | 758 (23.8)                | 577 (23.9)                | 403 (22.9)                |
| Vancouver Island          | 3059 (27.8)                | 2303 (28.2)               | 1794 (28.1)               | 1430 (28.7)               | 1122 (28.8)               | 934 (29.3)                | 703 (29.1)                | 513 (29.2)                |
| Missing/Unknown           | 48 (0.4)                   | 21 (0.3)                  | 15 (0.2)                  | 11 (0.2)                  | 8 (0.2)                   | 5 (0.2)                   | 4 (0.2)                   | 2 (0.1)                   |
| <b>Education</b>          |                            |                           |                           |                           |                           |                           |                           |                           |
| Below high school         | 173 (1.5)                  | 123 (1.5)                 | 89 (1.4)                  | 68 (1.4)                  | 51 (1.3)                  | 37 (1.2)                  | 26 (1.1)                  | 16 (0.9)                  |
| Below bachelor            | 5236 (47.6)                | 3835 (47.0)               | 2979 (46.7)               | 2303 (46.2)               | 1771 (45.5)               | 1453 (45.6)               | 1108 (45.8)               | 802 (45.6)                |

|                                          | Follow up #1<br>(n=10,993) | Follow up #2<br>(n=8,164) | Follow up #3<br>(n=6,375) | Follow up #4<br>(n=4,981) | Follow up #5<br>(n=3,891) | Follow up #6<br>(n=3,184) | Follow up #7<br>(n=2,417) | Follow up #8<br>(n=1,760) |
|------------------------------------------|----------------------------|---------------------------|---------------------------|---------------------------|---------------------------|---------------------------|---------------------------|---------------------------|
| University degree                        | 5529 (50.3)                | 4169 (51.1)               | 3283 (51.5)               | 2594 (52.1)               | 2057 (52.9)               | 1683 (52.9)               | 1278 (52.9)               | 939 (53.4)                |
| Missing/Unknown                          | 55 (0.5)                   | 37 (0.5)                  | 24 (0.4)                  | 16 (0.3)                  | 12 (0.3)                  | 11 (0.4)                  | 5 (0.2)                   | 31 (0.2)                  |
| <b>Quebec Material Deprivation Index</b> |                            |                           |                           |                           |                           |                           |                           |                           |
| 1 (Privileged)                           | 1547 (14.1)                | 1072 (13.75)              | 896 (14.1)                | 720 (14.5)                | 569 (14.6)                | 435 (13.7)                | 344 (14.2)                | 253 (14.4)                |
| 2                                        | 2078 (18.9)                | 1547 (19.0)               | 1198 (18.8)               | 1008 (20.2)               | 806 (20.7)                | 665 (20.9)                | 500 (20.7)                | 366 (20.8)                |
| 3                                        | 2994 (27.3)                | 2184 (26.8)               | 1674 (26.3)               | 1273 (25.6)               | 973 (25.0)                | 835 (26.2)                | 642 (26.6)                | 450 (25.6)                |
| 4                                        | 1277 (11.6)                | 942 (11.64)               | 748 (11.7)                | 580 (11.6)                | 475 (12.2)                | 379 (11.9)                | 285 (11.8)                | 215 (12.2)                |
| 5 (Deprived)                             | 1668 (15.2)                | 1290 (15.8)               | 1033 (16.2)               | 728 (15.7)                | 609 (15.7)                | 504 (15.8)                | 375 (15.5)                | 278 (15.8)                |
| Missing                                  | 1429 (13.0)                | 1069 (13.1)               | 826 (13.0)                | 616 (12.4)                | 459 (11.8)                | 366 (11.5)                | 271 (11.2)                | 198 (11.3)                |
| <b>Quebec Social Deprivation Index</b>   |                            |                           |                           |                           |                           |                           |                           |                           |
| 1 (Privileged)                           | 2188 (19.9)                | 1641 (20.1)               | 1286 (20.2)               | 1063 (21.3)               | 830 (20.3)                | 658 (20.7)                | 509 (21.1)                | 368 (20.9)                |
| 2                                        | 1441 (13.1)                | 1051 (12.9)               | 787 (12.4)                | 603 (12.1)                | 480 (12.3)                | 411 (12.9)                | 314 (13.0)                | 225 (12.8)                |
| 3                                        | 2478 (22.5)                | 1831 (22.4)               | 1480 (23.2)               | 1148 (23.1)               | 922 (23.7)                | 769 (24.2)                | 574 (23.8)                | 419 (23.8)                |
| 4                                        | 1601 (14.6)                | 1236 (15.1)               | 945 (14.8)                | 743 (14.9)                | 578 (14.9)                | 488 (15.3)                | 370 (15.3)                | 290 (16.5)                |
| 5 (Deprived)                             | 1856 (16.9)                | 1336 (16.4)               | 1051 (16.5)               | 808 (16.2)                | 622 (16.0)                | 392 (15.5)                | 379 (15.7)                | 260 (14.8)                |
| Missing/Unknown                          | 1429 (13)                  | 1069 (13.1)               | 826 (13.0)                | 616 (12.4)                | 459 (11.8)                | 492 (11.5)                | 271 (11.2)                | 198 (11.3)                |
| <b>Follow up consent</b>                 |                            |                           |                           |                           |                           |                           |                           |                           |
| Yes                                      | 10357 (94.2)               | 7793 (95.5)               | 6182 (97.0)               | 4857 (97.5)               | 3789 (97.4)               | 3106 (97.6)               | 2380 (98.5)               | 1714 (97.4)               |
| No                                       | 262 (2.4)                  | 142 (1.7)                 | 83 (1.3)                  | 49 (1.0)                  | 47 (1.2)                  | 31 (1.0)                  | 17 (0.7)                  | 19 (1.1)                  |
| Missing                                  | 374 (3.4)                  | 229 (2.8)                 | 110 (1.7)                 | 75 (1.5)                  | 55 (1.4)                  | 47 (1.5)                  | 20 (0.8)                  | 27 (1.5)                  |

**S3 Table.** Participant profile of BC-Mix follow up surveys: frequencies and proportions (%) [continued]

|                                | Follow up#9<br>(n=1,200) | Follow up #10<br>(n=488) |
|--------------------------------|--------------------------|--------------------------|
| <b>Complete responses</b>      | 1,178 (98.2)             | 483 (99.0)               |
| <b>Sex</b>                     |                          |                          |
| Male                           | 136 (11.3)               | 54 (11.1)                |
| Female                         | 1064 (88.7)              | 434 (88.9)               |
| <b>Age</b>                     |                          |                          |
| 18-34                          | 70 (5.8)                 | 30 (6.2)                 |
| 35-54                          | 226 (18.8)               | 87 (17.8)                |
| 55+                            | 904 (75.3)               | 371 (76.0)               |
| <b>Race/ethnicity</b>          |                          |                          |
| Aboriginal                     | 49 (4.1)                 | 18 (3.7)                 |
| Chinese                        | 12 (1.0)                 | 8 (1.6)                  |
| Not a visible minority (White) | 1117 (93.1)              | 453 (92.8)               |
| South Asian                    | 8 (0.7)                  | 3 (0.6)                  |
| Other                          | 0 (0)                    | 0 (0)                    |
| Missing/Unknown                | 14 (1.2)                 | 6 (1.2)                  |
| <b>Health region</b>           |                          |                          |
| Interior Health                | 223 (18.6)               | 88 (18.0)                |
| Fraser Health                  | 319 (26.6)               | 129 (26.4)               |
| Vancouver Coastal              | 268 (22.3)               | 106 (21.7)               |
| Vancouver Island               | 355 (29.6)               | 152 (31.2)               |
| Northern Island                | 33 (2.7)                 | 12 (2.5)                 |
| Missing/Unknown                | 2 (0.2)                  | 1 (0.2)                  |
| <b>Education</b>               |                          |                          |
| Below high school              | 7 (0.6)                  | 3 (0.6)                  |

|    |                          |                   |                        |
|----|--------------------------|-------------------|------------------------|
| 1  |                          |                   |                        |
| 2  |                          |                   |                        |
| 3  |                          | Below bachelor    | 549 (45.7) 205 (42.0)  |
| 4  |                          | University degree | 643 (53.6) 279 (57.2)  |
| 5  |                          | Missing/Unknown   | 1 (0.1) 1 (0.2)        |
| 6  |                          |                   |                        |
| 7  |                          |                   |                        |
| 8  | <b>Quebec Material</b>   |                   |                        |
| 9  | <b>Deprivation Index</b> |                   |                        |
| 10 |                          | 1 (Privileged)    | 166 (13.8) 71 (14.6)   |
| 11 |                          | 2                 | 257 (21.4) 94 (19.3)   |
| 12 |                          | 3                 | 296 (24.7) 125 (25.6)  |
| 13 |                          | 4                 | 142 (11.8) 50 (10.3)   |
| 14 |                          | 5 (Deprived)      | 192 (16.0) 85 (17.4)   |
| 15 |                          | Missing           | 147 (12.3) 63 (12.9)   |
| 16 |                          |                   |                        |
| 17 |                          |                   |                        |
| 18 | <b>Quebec Social</b>     |                   |                        |
| 19 | <b>Deprivation Index</b> |                   |                        |
| 20 |                          | 1 (Privileged)    | 253 (21.1) 88 (12.9)   |
| 21 |                          | 2                 | 165 (13.8) 63 (12.9)   |
| 22 |                          | 3                 | 276 (23.0) 123 (25.2)  |
| 23 |                          | 4                 | 192 (16.0) 80 (16.4)   |
| 24 |                          | 5 (Deprived)      | 167 (13.9) 71 (14.6)   |
| 25 |                          | Missing           | 147 (12.2) 63 (12.9)   |
| 26 |                          |                   |                        |
| 27 |                          |                   |                        |
| 28 | <b>Follow up consent</b> |                   |                        |
| 29 |                          |                   |                        |
| 30 |                          | Yes               | 1170 (97.5) 475 (97.3) |
| 31 |                          | No                | 8 (0.7) 8 (1.6)        |
| 32 |                          | Missing           | 22 (1.8) 5 (1.0)       |
| 33 |                          |                   |                        |

1  
2  
3  
4  
5  
6  
7  
8  
9  
10  
11  
12  
13  
14  
15  
16  
17  
18  
19  
20  
21  
22  
23  
24  
25  
26  
27  
28  
29  
30  
31  
32  
33  
34  
35  
36  
37  
38  
39  
40  
41  
42  
43  
44  
45  
46  
47

**S4 Table.** Participant profile of BC-Mix baseline data (n=33, 650), using at least 67% survey completion threshold

|                |                   | Survey                |               |                    |            |
|----------------|-------------------|-----------------------|---------------|--------------------|------------|
|                |                   | Un-weighted frequency | Un-weighted % | Weighted frequency | Weighted % |
| Sex            |                   |                       |               |                    |            |
|                | Male              | 5,362                 | 15.9          | 16680              | 49.4       |
|                | Female            | 28, 288               | 84.1          | 17058              | 50.6       |
|                | Missing           |                       |               |                    |            |
| Age            |                   |                       |               |                    |            |
|                | 18-34             | 3,957                 | 11.8          | 9,063              | 26.9       |
|                | 35-54             | 9,674                 | 28.8          | 11,111             | 32.9       |
|                | 55+               | 20,019                | 59.5          | 13564              | 40.2       |
| Race/ethnicity |                   |                       |               |                    |            |
|                | Indigenous        | 1,394                 | 4.1           | 1,718              | 5.1        |
|                | Chinese           | 711                   | 2.1           | 3,601              | 10.7       |
|                | White             | 28,728                | 85.4          | 21,216             | 62.9       |
|                | South Asian       | 405                   | 1.2           | 2,478              | 7.3        |
|                | Other             | 1,385                 | 4.1           | 3,429              | 10.2       |
|                | Missing/Unknown   | 1,027                 | 3.1           | 1300               | 3.9        |
| Health region  |                   |                       |               |                    |            |
|                | Fraser Health     | 8038                  | 26.1          | 11327              | 33.6       |
|                | Interior Health   | 5,806                 | 118.9         | 5023               | 14.9       |
|                | Northern Island   | 1735                  | 5.6           | 1732               | 5.1        |
|                | Vancouver Coastal | 6993                  | 22.7          | 7739               | 22.9       |

|                   |                                            | Survey                |               |                    |            |
|-------------------|--------------------------------------------|-----------------------|---------------|--------------------|------------|
|                   |                                            | Un-weighted frequency | Un-weighted % | Weighted frequency | Weighted % |
| Education         | Vancouver Island                           | 8234                  | 26.7          | 5308               | 15.7       |
|                   | Missing/Unknown                            | 2844                  | n/a           | 2610               | 7.7        |
|                   | Below high school                          | 807                   | 2.4           | 1,096              | 3.2        |
|                   | Below bachelor                             | 16,928                | 50.3          | 15,176             | 45.0       |
|                   | University degree                          | 15,029                | 44.7          | 16,273             | 48.2       |
|                   | Missing/Unknown                            | 886                   | 2.6           | 1,193              | 3.1        |
| Employment status | Employed full-time (30 hours or more/week) | 10,654                | 32.0          | 1308               | 40.8       |
|                   | Employed part-time                         | 2,993                 | 9.0           | 3,131              | 9.4        |
|                   | Self-employed                              | 2,704                 | 8.1           | 3,013              | 9.0        |
|                   | Unemployed but looking for a job           | 952                   | 2.9           | 1,522              | 4.6        |
|                   | Unemployed and not looking for a job       | 406                   | 1.2           | 511                | 1.5        |
|                   | Full-time parent, homemaker                | 879                   | 2.6           | 740                | 2.2        |
|                   | Retired                                    | 12,757                | 38.3          | 8,096              | 24.3       |
|                   | Student/Pupil                              | 566                   | 1.7           | 1,197              | 3.6        |



1  
2  
3  
4  
5  
6  
7  
8  
9  
10  
11  
12  
13  
14  
15  
16  
17  
18  
19  
20  
21  
22  
23  
24  
25  
26  
27  
28  
29  
30  
31  
32  
33  
34  
35  
36  
37  
38  
39  
40  
41  
42  
43  
44  
45  
46  
47

|                            |                            | Survey                |               |                    |            |
|----------------------------|----------------------------|-----------------------|---------------|--------------------|------------|
|                            |                            | Un-weighted frequency | Un-weighted % | Weighted frequency | Weighted % |
| Material Deprivation Index | Long-term sick or disabled | 968                   | 2.9           | 914                | 2.7        |
|                            | Prefer not to answer       | 424                   | 1.3           | 620                | 1.9        |
|                            | Missing/Unknown            | 347                   | n/a           | n/a                | n/a        |
|                            | 1 (Privileged)             | 6,219                 | 22.8          | 6,106              | 22.1       |
|                            | 2                          | 6,199                 | 22.6          | 5,850              | 21.1       |
|                            | 3                          | 6,565                 | 24.0          | 5935               | 21.4       |
|                            | 4                          | 4,616                 | 16.8          | 5,179              | 18.7       |
|                            | 5 (Deprived)               | 3,810                 | 13.9          | 4,612              | 16.7       |
|                            | Missing                    | 6,241                 | n/a           | n/a                | n/a        |
|                            | Follow up consent          | Yes                   | 20,633        | 68.8               | 19,051     |
| No                         |                            | 11,689                | 36.1          | 13,275             | 41.1       |
| Missing                    |                            | 1,328                 | n/a           | n/a                | n/a        |
| Data linkage consent       | Yes                        | 7,290                 | 27.3          | 7,318              | 20.4       |
|                            | No                         | 19,467                | 72.8          | 20,362             | 73.6       |
|                            | Missing                    | 6,893                 | n/a           | n/a                | n/a        |

**S5 Table.** BC-Mix eligible sample (baseline) by month recruited

| Month           | Number of eligible (n=41,375) | % of sample |
|-----------------|-------------------------------|-------------|
| September, 2020 | 6,488                         | 15.68       |
| October, 2020   | 3,516                         | 8.5         |
| November, 2020  | 1,653                         | 4           |
| December, 2020  | 3,335                         | 8.1         |
| January, 2021   | 2,460                         | 6           |
| February, 2021  | 994                           | 2.4         |
| March, 2021     | 1,353                         | 3.3         |
| April, 2021     | 2,507                         | 6.1         |
| May, 2021       | 4,696                         | 11.4        |
| June, 2021      | 8,238                         | 19.9        |
| July, 2021      | 6,135                         | 14.8        |

1  
2  
3  
4  
5  
6  
7  
8  
9  
10  
11  
12  
13  
14  
15  
16  
17  
18  
19  
20  
21  
22  
23  
24  
25  
26  
27  
28  
29  
30  
31  
32  
33  
34  
35  
36  
37  
38  
39  
40  
41  
42  
43  
44  
45  
46  
47

**S6 Table.** Comparison of participant eligibility across survey rounds

|                             | Baseline survey | Follow up#1 | Follow up #2 | Follow up #3 | Follow up #4 | Follow up #5 | Follow up#6 | Follow up#7 | Follow up#8 | Follow up#9 | Follow up#10 |
|-----------------------------|-----------------|-------------|--------------|--------------|--------------|--------------|-------------|-------------|-------------|-------------|--------------|
| Total (eligible+ineligible) | 57,077          | 11,677      | 8,624        | 6,657        | 5,173        | 4,037        | 3,309       | 2,503       | 1,815       | 1,234       | 513          |
| Eligible                    | 41,375          | 10,993      | 8,164        | 6,375        | 4,981        | 3,891        | 3,184       | 2,417       | 1,760       | 1,200       | 488          |
| % eligible                  | 72.5            | 94.1        | 94.7         | 95.8         | 96.3         | 96.4         | 96.2        | 96.6        | 97          | 97.2        | 95.1         |

For peer review only

**S7 Table. Comparison of participants with 100% survey completion versus those without 100% completion (baseline data)**

|                |                   | 100% completion (n=26, 757) |               | < 100% completion (n=14,618) |               |
|----------------|-------------------|-----------------------------|---------------|------------------------------|---------------|
|                |                   | Un-weighted Frequency       | Un-weighted % | Un-weighted Frequency        | Un-weighted % |
| Sex            |                   |                             |               |                              |               |
|                | Male              | 4,407                       | 16.5          | 2,416                        | 16.5          |
|                | Female            | 22,350                      | 83.5          | 12,202                       | 83.5          |
| Age            |                   |                             |               |                              |               |
|                | 18-34             | 3,383                       | 12.6          | 1,595                        | 10.9          |
|                | 35-54             | 8,056                       | 30.1          | 4,054                        | 27.7          |
|                | 55+               | 15,318                      | 57.3          | 8,969                        | 61.4          |
| Race/ethnicity |                   |                             |               |                              |               |
|                | Indigenous        | 1,072                       | 4.1           | 685                          | 4.7           |
|                | Chinese           | 627                         | 2.3           | 255                          | 1.7           |
|                | White             | 22,842                      | 85.4          | 12,184                       | 83.4          |
|                | South Asian       | 305                         | 1.1           | 301                          | 2.1           |
|                | Other             | 1,123                       | 4.2           | 643                          | 4.4           |
|                | Missing/Unknown   | 788                         | 3.0           | 550                          | 3.8           |
| Health region  |                   |                             |               |                              |               |
|                | Fraser Health     | 6,928                       | 26.1          | 1,523                        | 26.3          |
|                | Interior Health   | 4,923                       | 18.5          | 1,220                        | 21.1          |
|                | Northern Island   | 1,465                       | 5.5           | 360                          | 6.2           |
|                | Vancouver Coastal | 6,175                       | 23.2          | 1,140                        | 19.7          |
|                | Vancouver Island  | 7,095                       | 26.7          | 1,545                        | 26.7          |
|                | Missing/Unknown   | 171                         | n/a           | 8,830                        | n/a           |

## Education

|                   |        |      |       |      |
|-------------------|--------|------|-------|------|
| Below high school | 585    | 2.2  | 222   | 1.5  |
| Below bachelor    | 13,155 | 49.2 | 3,773 | 25.8 |
| University degree | 12,634 | 47.2 | 2,395 | 16.4 |
| Missing/Unknown   | 383    | 1.4  | 8,228 | 56.3 |

## Follow up consent

|         |        |      |       |      |
|---------|--------|------|-------|------|
| Yes     | 16,404 | 61.3 | 4,229 | 76.0 |
| No      | 10,353 | 38.7 | 1,336 | 24.0 |
| Missing | n/a    | n/a  | 9,053 | n/a  |

---

# BMJ Open

## Cohort profile: the British Columbia COVID-19 population mixing patterns survey (BC-Mix)

|                                 |                                                                                                                                                                                                                                                                                                                                                                                                                                                                                                                                                                                                                                                                                                                                                                                                                                                                                                                                                                                                                                                                                                                                                                                                                                                                                                                                                                                                                                                                                                                                                                                                                                    |
|---------------------------------|------------------------------------------------------------------------------------------------------------------------------------------------------------------------------------------------------------------------------------------------------------------------------------------------------------------------------------------------------------------------------------------------------------------------------------------------------------------------------------------------------------------------------------------------------------------------------------------------------------------------------------------------------------------------------------------------------------------------------------------------------------------------------------------------------------------------------------------------------------------------------------------------------------------------------------------------------------------------------------------------------------------------------------------------------------------------------------------------------------------------------------------------------------------------------------------------------------------------------------------------------------------------------------------------------------------------------------------------------------------------------------------------------------------------------------------------------------------------------------------------------------------------------------------------------------------------------------------------------------------------------------|
| Journal:                        | <i>BMJ Open</i>                                                                                                                                                                                                                                                                                                                                                                                                                                                                                                                                                                                                                                                                                                                                                                                                                                                                                                                                                                                                                                                                                                                                                                                                                                                                                                                                                                                                                                                                                                                                                                                                                    |
| Manuscript ID                   | bmjopen-2021-056615.R2                                                                                                                                                                                                                                                                                                                                                                                                                                                                                                                                                                                                                                                                                                                                                                                                                                                                                                                                                                                                                                                                                                                                                                                                                                                                                                                                                                                                                                                                                                                                                                                                             |
| Article Type:                   | Cohort profile                                                                                                                                                                                                                                                                                                                                                                                                                                                                                                                                                                                                                                                                                                                                                                                                                                                                                                                                                                                                                                                                                                                                                                                                                                                                                                                                                                                                                                                                                                                                                                                                                     |
| Date Submitted by the Author:   | 17-Jun-2022                                                                                                                                                                                                                                                                                                                                                                                                                                                                                                                                                                                                                                                                                                                                                                                                                                                                                                                                                                                                                                                                                                                                                                                                                                                                                                                                                                                                                                                                                                                                                                                                                        |
| Complete List of Authors:       | Adu, Prince; BC Centre for Disease Control; The University of British Columbia, School of Population and Public Health<br>Binka, Mawuena; BC Centre for Disease Control<br>Mahmood, Bushra; The University of British Columbia, Department of Medicine<br>Jeong, Dahn; BC Centre for Disease Control; The University of British Columbia, School of Population and Public Health<br>Buller-Taylor, Terri; BC Centre for Disease Control<br>Damascene, Makuza Jean; BC Centre for Disease Control; The University of British Columbia, School of Population and Public Health<br>Iyaniwura, Sarafa; BC Centre for Disease Control; The University of British Columbia, Department of Mathematics<br>Ringa, Notice; BC Centre for Disease Control; The University of British Columbia, School of Population and Public Health<br>Velásquez García, Héctor A.; BC Centre for Disease Control, School of Population and Public Health; The University of British Columbia<br>Wong, Stanley; BC Centre for Disease Control<br>Yu, Amanda; BC Centre for Disease Control<br>Bartlett, Sofia; BC Centre for Disease Control; The University of British Columbia, Department of Pathology and Laboratory Medicine<br>Wilton, James; BC Centre for Disease Control<br>Irvine, Mike A.; BC Centre for Disease Control; Simon Fraser University, Faculty of Health Sciences<br>Otterstatter, Michael; BC Centre for Disease Control; The University of British Columbia, School of Population and Public Health<br>Janjua, Naveed ; BC Centre for Disease Control; The University of British Columbia, School of Population and Public Health |
| <b>Primary Subject Heading</b>: | Public health                                                                                                                                                                                                                                                                                                                                                                                                                                                                                                                                                                                                                                                                                                                                                                                                                                                                                                                                                                                                                                                                                                                                                                                                                                                                                                                                                                                                                                                                                                                                                                                                                      |
| Secondary Subject Heading:      | Public health                                                                                                                                                                                                                                                                                                                                                                                                                                                                                                                                                                                                                                                                                                                                                                                                                                                                                                                                                                                                                                                                                                                                                                                                                                                                                                                                                                                                                                                                                                                                                                                                                      |
| Keywords:                       | COVID-19, PUBLIC HEALTH, Health & safety < HEALTH SERVICES ADMINISTRATION & MANAGEMENT, Epidemiology < INFECTIOUS DISEASES                                                                                                                                                                                                                                                                                                                                                                                                                                                                                                                                                                                                                                                                                                                                                                                                                                                                                                                                                                                                                                                                                                                                                                                                                                                                                                                                                                                                                                                                                                         |
|                                 |                                                                                                                                                                                                                                                                                                                                                                                                                                                                                                                                                                                                                                                                                                                                                                                                                                                                                                                                                                                                                                                                                                                                                                                                                                                                                                                                                                                                                                                                                                                                                                                                                                    |

1  
2  
3  
4  
5  
6  
7  
8  
9  
10  
11  
12  
13  
14  
15  
16  
17  
18  
19  
20  
21  
22  
23  
24  
25  
26  
27  
28  
29  
30  
31  
32  
33  
34  
35  
36  
37  
38  
39  
40  
41  
42  
43  
44  
45  
46  
47  
48  
49  
50  
51  
52  
53  
54  
55  
56  
57  
58  
59  
60







I, the Submitting Author has the right to grant and does grant on behalf of all authors of the Work (as defined in the below author licence), an exclusive licence and/or a non-exclusive licence for contributions from authors who are: i) UK Crown employees; ii) where BMJ has agreed a CC-BY licence shall apply, and/or iii) in accordance with the terms applicable for US Federal Government officers or employees acting as part of their official duties; on a worldwide, perpetual, irrevocable, royalty-free basis to BMJ Publishing Group Ltd ("BMJ") its licensees and where the relevant Journal is co-owned by BMJ to the co-owners of the Journal, to publish the Work in this journal and any other BMJ products and to exploit all rights, as set out in our [licence](#).

The Submitting Author accepts and understands that any supply made under these terms is made by BMJ to the Submitting Author unless you are acting as an employee on behalf of your employer or a postgraduate student of an affiliated institution which is paying any applicable article publishing charge ("APC") for Open Access articles. Where the Submitting Author wishes to make the Work available on an Open Access basis (and intends to pay the relevant APC), the terms of reuse of such Open Access shall be governed by a Creative Commons licence – details of these licences and which [Creative Commons](#) licence will apply to this Work are set out in our licence referred to above.

Other than as permitted in any relevant BMJ Author's Self Archiving Policies, I confirm this Work has not been accepted for publication elsewhere, is not being considered for publication elsewhere and does not duplicate material already published. I confirm all authors consent to publication of this Work and authorise the granting of this licence.

## Cohort profile: the British Columbia COVID-19 population mixing patterns survey (BC-Mix)

Prince A. Adu<sup>1,2</sup>, Mawuena Binka<sup>1</sup>, Bushra Mahmood,<sup>3</sup> Dahn Jeong<sup>1,2</sup>, Terri Buller-Taylor<sup>1</sup>, Makuza Jean Damascene<sup>1,2</sup>, Sarafa Iyaniwura<sup>1,4</sup>, Notice Ringa<sup>1,2</sup>, Héctor A. Velásquez García<sup>1,2</sup>, Stanley Wong<sup>1</sup>, Amanda Yu<sup>1</sup>, Sofia Bartlett<sup>1,6</sup>, James Wilton<sup>1</sup>, Mike A. Irvine<sup>1,7</sup>, Michael Otterstatter<sup>1,2</sup>, Naveed Z. Janjua<sup>1,2,8</sup>

<sup>1</sup>British Columbia Centre for Disease Control, Vancouver, British Columbia, Canada

<sup>2</sup>School of Population and Public Health, University of British Columbia, Vancouver, British Columbia, Canada

<sup>3</sup>Department of Medicine, University of British Columbia, Vancouver, British Columbia, Canada

<sup>4</sup>Department of Mathematics, University of British Columbia, Vancouver, British Columbia, Canada

<sup>5</sup>Faculty of Health Sciences, Simon Fraser University, Burnaby, British Columbia, Canada

<sup>6</sup>Department of Pathology and Laboratory Medicine, Vancouver, British Columbia, Canada

<sup>7</sup>Faculty of Health Sciences, Simon Fraser University, Burnaby, British Columbia, Canada

<sup>8</sup>Centre for Health Evaluation & Outcome Sciences, St. Paul's Hospital, Vancouver, British Columbia, Canada

Corresponding author:

Naveed Zafar Janjua MBBS, MSc, DrPH  
655 W 12th Ave, Vancouver, BC V5Z 4R4  
[Naveed.janjua@bccdc.ca](mailto:Naveed.janjua@bccdc.ca)

## ABSTRACT

### Purpose

Several non-pharmaceutical interventions such as physical distancing, hand washing, self-isolation, and schools and business closures, were implemented in British Columbia (BC) following the first laboratory-confirmed case of coronavirus disease 2019 (COVID-19) on January 26, 2020, to minimize in-person contacts that could spread infections. The BC COVID-19 Population Mixing Patterns survey (BC-Mix) was established as a surveillance system to measure behaviour and contact patterns in BC over time to inform the timing of the easing/re-imposition of control measures. In this paper, we describe the BC-Mix survey design and the demographic characteristics of respondents.

### Participants

The ongoing repeated online survey was launched in September 2020. Participants are mainly recruited through social media platforms (including Instagram, Facebook, YouTube, WhatsApp). A follow up survey is sent to participants two to four weeks after completing the baseline survey. Survey responses are weighted to BC's population by age, sex, geography, and ethnicity to obtain generalizable estimates. Additional indices such as the material and social deprivation index, residential instability, economic dependency, and others are generated using census and location data.

### Findings to date

As of July 26, 2021, over 61,000 baseline survey responses were received of which 41,375 were eligible for analysis. Of the eligible participants, about 60% consented to follow up and about 27% provided their personal health numbers for linkage with healthcare databases.

Approximately 83.5% of respondents were female, 58.7% were 55 years or older, 87.5% identified as White and 45.9% had at least a university degree. After weighting, approximately 50% were female, 39% were 55 years or older, 65% identified as White and 50% had at least a university degree.

### Future plans

Multiple papers describing contact patterns, physical distancing measures, regular handwashing and facemask wearing, modelling looking at impact of physical distancing measures and vaccine acceptance, hesitancy and uptake are either in progress or have been published.

## Strength and Limitations

- The sample size for this study is larger than comparable studies.
- Our methodology allows us to consider many auxiliary variables to enhance the representativeness of our sample to the general population.
- We employ an efficient and cost-effective recruitment strategy providing real time data.
- Some population groups are underrepresented in the survey possibly due to lack of access to social media.
- Our survey responses may be subject to recall bias since we ask respondents to recall contacts and other behaviours or activities from the previous day.

## Introduction

The novel coronavirus disease 2019 (COVID-19), caused by the severe acute respiratory syndrome coronavirus 2 (SARS-CoV-2), has spread worldwide since December 2019. A global pandemic was declared by the World Health Organization in March 2020 and, as of July 2021, there have been over 200 million cases of COVID-19 infections and over 4.3 million resultant deaths globally (1). As the rollout of COVID-19 vaccines continue at varying rates worldwide, physical distancing measures (2) remain among the most effective methods for COVID-19 prevention and control (3). Many governments have put in place physical distancing measures such as travel restrictions, closure of schools and workplaces, and the banning of large group gatherings to interrupt the transmission of SARS-CoV-2. These measures attempt to reduce contact between infected and healthy individuals in order to minimize disease spread and the impact on the healthcare system.

British Columbia (BC) is located on the West Coast of Canada and covers almost a million square kilometres. It has a diverse population of approximately 5.15 million as of July 1, 2020 (4). Public health officials in BC began urging the public to practice physical distancing and avoid any non-essential travel in early March 2020. By March 17, 2020, a public health emergency was declared in the province and various physical distancing measures were implemented (5). These included restriction of indoor and outdoor gatherings, closure of businesses that were unable to meet physical distancing measures, self-isolation requirements after travelling outside the country, and general physical distancing in all public space.

Assessing the impact of physical distancing measures on person-to-person contact can provide valuable information for refining control measures and help minimize both COVID-19-related disease burden and the related economic, social, and mental health impacts. Although methods such as mathematical modelling can estimate the potential for resurgences, these methods often lack population-based empirical data on contact patterns, especially on the varying levels of contact patterns exhibited by different demographic groups in the population. These population-specific data could better inform mathematical models by incorporating explicit knowledge of contact patterns that are driving transmission rather than inferring these

1  
2  
3 from reported cases and hospitalizations (6–8). Ultimately, they serve as an evidence-base to  
4 guide targeted measures that are amenable to actions by the government to ensure that the  
5 COVID-19 cases remain below the resurgence thresholds.  
6  
7

8 Various studies have assessed the impact of physical distancing measures imposed by  
9 governments on local contact patterns and behaviours during the COVID-19 pandemic in  
10 Belgium (8), Greece (9), Kenya (10), Luxembourg (11), the Netherlands (12), and the U.K (13).  
11 Others include Verelst and colleagues' SOCRATES-CoMix study (14) and a rapid review of  
12 social contact patterns by Liu et al. (15) Such surveys can measure the public's compliance with  
13 physical distancing measures and provide valuable information to inform other public health  
14 measures that may be necessary to avoid further waves of COVID-19 infections. In addition, the  
15 impact of physical distancing measures on mixing patterns and contact behaviours may vary  
16 across different age groups, and by individuals' primary place of activity such as schools or  
17 workplaces (9,16–18).  
18  
19  
20  
21

22 Here, we describe the development of the BC COVID-19 Population Mixing Patterns  
23 survey (BC-Mix), an ongoing online survey to monitor and assess social contact behaviours and  
24 mixing patterns in BC, Canada, during the COVID-19 pandemic. We detail the development of  
25 the survey and recruitment of respondents, as well as the characteristics of the participants.  
26  
27

28 Cohort description  
29

### 30 *Survey design and methodology*

31  
32 The BC-Mix (<http://www.bccdc.ca/our-research/projects/bc-mix-covid-19-survey>;  
33 <https://a4ph.med.ubc.ca/projects-and-initiatives/bc-mix/>) uses a cross-sectional survey design  
34 with longitudinal follow-up. Eligible population include residents of BC who are at least 18  
35 years of age. The survey began on September 4, 2020, and as at the time of this publication, is  
36 still ongoing. Once a participant has completed the survey for the first time, they are invited for  
37 repeated follow-up. The first-time responses are referred to as the 'baseline'. Participants  
38 responding to the baseline survey are invited to complete the first follow-up survey after two  
39 weeks. Subsequent follow-up surveys are then sent in four-week intervals, following the  
40 completion of the previous survey.  
41  
42  
43  
44

### 45 *Participant recruitment*

46 To capture participants from a broad demographic range, the survey invitation is disseminated  
47 through Instagram, Facebook, YouTube, WhatsApp, Twitter, and Google search engine results  
48 pages. The Google Ads Audience manager and Facebook Ads manager allow for paid  
49 advertisements to be targeted at specific audiences. We use these tools to target the survey  
50 advertisement campaigns to only residents of BC who are 18 years and above. We also monitor  
51 the demographic profile of survey participants and occasionally use these functions to target  
52 recruitment of certain age groups or sex that may be underrepresented using the BC population  
53 as our point of reference (19).  
54  
55  
56  
57

To help capture underrepresented groups, we promote the survey to various ethnic populations. For instance, a South Asian community organization promotes the survey on their social media pages and also sends the survey to individuals on their mailing list. Although the survey is in English, it is also promoted in different languages (specifically, Korean and Farsi) to members of minority community groups in BC on their social media pages. Flyers are also distributed at grocery stores and restaurants particularly including those frequented by minority groups.

### ***Patient and Public Involvement***

The initial version of the BC-Mix survey was first piloted with a randomly selected sample of the BC population and feedback received was incorporated in the final version before the official launch of the survey. Methods of recruitment and priority of research questions were also informed by discussions with members of the public and with a community group. We also receive input from survey participants on an ongoing basis through a dedicated e-mail address. We plan to create dashboards and other infographics of the study results on the study's website.

### ***Survey domain and case definitions***

The BC-Mix survey instrument was adapted from the POLYMOD study (17) and the Berkeley Interpersonal Contact Study [BICS] (20), and was administered through Qualtrics (21), an online survey tool. The baseline survey comprises 94 questions across six key domains:

1. **Demographic information:** This domain includes age, sex, gender, ethnicity, education, employment, household characteristics, and postal code.
2. **COVID-19 testing and results, symptoms, and health behaviours:** This domain captures COVID-19 testing information, symptoms, and behaviours such as doctor visits following symptoms.
3. **Activities and behaviour in and outside of the home:** This domain captures social contact and mixing behaviours such as number of contacts, location, and duration of contact during the past 24 hours. Other questions in this domain include age and sex of contact, and relationship of respondent to the contact persons, physical distancing behaviour (e.g., handwashing) and personal protective equipment use. Initially, respondents were asked to provide this information for up to three of their reported contacts. We began collecting data on the characteristics of up to 10 contacts from December 11, 2020. Also from December 11, 2020, we began collecting general information about greater than 10 contacts i.e., if a participant reports more than 10 contacts per day, they are asked general questions about these contacts for e.g., age group, duration, and location of the majority of those contacts. If majority of contacts took place at a workplace setting, a follow up question asks respondents to report the type of work setting where the contacts occurred.
4. **Internet and social media use:** This domain captures information on internet and social media use, such as most frequently used platform and frequency of use.



- 1  
2  
3  
4  
5  
6  
7  
8  
9  
10  
11  
12  
13  
14  
15  
16  
17  
18  
19  
20  
21  
22  
23  
24  
25  
26  
27  
28  
29  
30  
31  
32  
33  
34  
35
5. **Perceptions and attitudes around COVID-19:** This domain measures the respondent's perception of physical distancing measures, and their self-confidence or ability to carry them out.
  6. **COVID-19 vaccine acceptance sub-questionnaire:** This sub-questionnaire was added on March 8, 2021. Items from this domain were developed using a vaccine acceptance behavioral framework, which synthesizes constructs from the Theory of Reasoned Action (TRA)(22), Theory of Planned Behavior (TPB)(23,24) and the Health Belief Model (HBM) (25), to understand and predict the uptake of COVID-19 vaccine. According to the TRA, the best single predictor of behaviour is an individual's intention (26). Intentions, in turn, are an outcome of the individual's attitude toward performing the behavior in question, and/or the individual's perceptions of support from family and friends (subjective norms) for engaging in the behavior (27). Perceived control or self-efficacy, the confidence that one has the ability to perform the intended behavior (28), is another important construct taken from TPB. The TPB assumes that an individual's perception of whether they can successfully engage in a particular behavior often has a direct effect on their intentions, such as getting a vaccine (29). The widely-used HBM, has previously been used to evaluate beliefs and attitudes toward seasonal influenza and pandemic swine flu vaccines as well as the COVID-19 vaccine (30–33). Relevant constructs from HBM were applied to develop questionnaire items to assess perceived threat of contracting the COVID-19, perceived severity of disease if infected and belief in the safety and effectiveness of getting the vaccine. Overall, this sub-questionnaire is meant to provide an understanding of some of the individual level health beliefs, perceptions and attitudes that may influence vaccine uptake. The vaccine acceptance sub-questionnaire has the following domains: *Attitude (perceived susceptibility, severity, benefits and barriers), Descriptive and Subjective Norms, Perceived Control, and Intention.*

36  
37  
38  
39  
40  
41  
42  
43

Location data is used to generate other indicators at the area level. For example, the Quebec Material and Social Deprivation combines six indicators related to health and welfare that represent material or social deprivation based on Canadian Census data, including 1) proportion of persons without high school diploma 2) ratio of employment to population 3) average income 4) proportion of persons separated, divorced, widowed 5) proportion of single-parent families and 6) proportion of people living alone (34).

44  
45  
46

A full list of key variables in the survey and definitions is presented in S1 Table in the Supplementary file.

#### 47 48 49

***Analysis, data cleaning and weighting***

50  
51  
52  
53  
54  
55  
56  
57

Quota sampling has been used by other studies to achieve representativeness (8,35). We used two approaches to achieve the same goal: adaptive recruitment through promotion and targeting to specific populations, and post hoc weighting. Our survey tool does not set quotas on recruitment but uses targeted advertisements to improve representativeness.



1  
2  
3 All suspected duplicate responses are removed (i.e., a participant filling the survey more than  
4 once in a survey round). For suspected duplicates, the most recent record is retained, and others  
5 are removed. A survey completion rate of at least 33% of questions, and valid non-missing  
6 responses for the sex and age questions are required for inclusion for weighting the survey data  
7 and further analysis. To ensure that the BC-Mix sample is representative of the BC population,  
8 survey data are weighted using the weighting adjustment technique (36) to obtain generalizable  
9 estimates (Table 1). Using the 2016 Census data (37), the survey is weighted with the following  
10 auxiliary variables: age, sex, geography, and ethnicity in the following hierarchy: as our first  
11 criterion, we consider age, sex, geography and ethnicity as our auxiliary variables. If a record has  
12 valid responses for all these variables except the ethnicity variable, then the survey weight is  
13 generated using only age, sex, and geography (second criterion). If a record does not meet the  
14 first and second criteria, then we apply the third criterion which uses age, sex, and ethnicity as  
15 the auxiliary variables. Finally, we use only age and sex as auxiliary variables if a record does  
16 not satisfy the first three criteria.  
17  
18  
19  
20  
21

22  
23 Survey weights are estimated separately for baseline and for each follow-up. To assess  
24 participant profile, we computed un-weighted and weighted frequency and percentages of key  
25 demographic variables using SAS Software version 9.4. Baseline survey data was used to  
26 provide the survey participant profile and in comparison to the BC population profile (Table 1).  
27 To assess potential systematic differences between eligible and ineligible responses, a  
28 comparison of the baseline eligible participants versus ineligible participants is presented in S2  
29 Table in the Supplementary file. Participant profile of follow up surveys is also presented in S3  
30 Table in the Supplementary file.  
31  
32  
33

### 34 ***Ethics and dissemination***

35  
36 Informed consent was sought on the survey start page. The study was reviewed and approved by  
37 the University of British Columbia Behavioral Research Ethics Board (No: H20-01785). Data  
38 from BC-Mix contribute to modelling projections to inform COVID-19 control measures in BC  
39 (38). Multiple papers describing contact patterns, physical distancing measures, regular  
40 handwashing and facemask wearing, modelling looking at impact of physical distancing  
41 measures and vaccination levels, vaccine acceptance, hesitancy, and uptake are either in progress  
42 or have been published (39,40).  
43  
44  
45  
46

### 47 ***Preliminary results***

48  
49 As of July 26, 2021, there were 61,183 respondents who participated in the baseline survey of  
50 which 41,375 were eligible for analysis. There were 15,194 (eligible=10,993) participants in the  
51 first follow-up survey, 11,343 (eligible n=8,164) in the second, 8,521 (eligible n=6,375) in the  
52 third, 6,487 (eligible n=4,981) in the fourth, 5,014 (eligible=3,891) in the fifth, 4,094  
53 (eligible=3,184) in the sixth, 3,125 (eligible n= 2,417) in the seventh and 2,317 (eligible  
54 n=1,760) participants in the eighth follow-up survey (Figure 1). Examining the eligible baseline  
55  
56  
57

1  
2  
3 sample by month recruited, June 2021 recorded the highest proportion (19.9%) of recruited  
4 participants (S4 Table in the Supplementary File).

5  
6 Whereas the survey completion rate for the baseline survey was 64.7%, the least completion rate  
7 in the follow up surveys was 96.6% (S3 Table in the Supplementary File). Also, excluding  
8 duplicates, although 72.5% of the baseline records was eligible, all the follow up surveys had  
9 more than 94% eligible (S5 Table in the Supplementary File).

10  
11  
12 Considering the baseline sample (Table 1), there were approximately equal number of male and  
13 female (weighted % of female =50.0%). Majority of participants were 55 years or older  
14 (weighted % = 39.4%), self identified as White (weighted % = 64.6%), had at least a university  
15 degree (weighted %= 50.0%) and lived in the Fraser Health region (weighted % = 36.2%).

16  
17  
18 Almost 63.8% (unweighted n=20,633) consented to a follow-up after the baseline survey and at  
19 least 94.2% (unweighted n=10,357) consented to receiving subsequent follow-up surveys (Table  
20 1 and S3 Table in the Supplementary file). Approximately 27.3% (unweighted n=7,290) of  
21 respondents in the baseline provided their personal health numbers for linkage with other  
22 healthcare utilization databases.

23  
24  
25  
26 After weighting, the distribution of the baseline survey sample was similar to the general BC  
27 population in terms of age, sex, health region, and ethnicity (Table 1). The distribution of the  
28 eligible participants was also similar to the distribution of ineligible participants in terms of sex,  
29 age, race/ethnicity, and geography/health region (S2 Table in the Supplementary file). Moreover,  
30 in a sensitivity analysis, we used a cut off threshold of 67% instead of 33% and observed that the  
31 distribution of this sample was similar to the distribution obtained in our current eligible sample  
32 (S6 Table in the Supplementary file). In addition we compared the characteristics of a sample  
33 with 100% completion and < 100% completion and found no systematic differences in  
34 demographic characteristics between the two samples (S7 Table in the Supplementary file).

### 35 36 37 38 **Findings to date**

39  
40 Following the identification of COVID-19 cases in BC, several interventions including physical  
41 distancing measures were implemented to limit the spread of COVID-19 in the province.  
42 Subsequently, the BC-Mix was developed by the BC Centre for Disease Control (BCCDC)(41)  
43 as part of an early warning system for monitoring social and physical interactions between  
44 individuals of different age-groups and demography, and to help predict when COVID-19  
45 transmission might further increase. This paper describes the BC-Mix survey methods and the  
46 profile of survey respondents.

47  
48  
49  
50 Recent studies similar to the BC-Mix have assessed social contact patterns relevant to the spread  
51 and control of COVID-19 in different countries (8–13,42,43), many of which have adapted  
52 features of the POLYMOD project (17). The 2020 Belgian CoMix survey (8) is an online  
53 longitudinal survey that closely monitors changes in social mixing behaviours among a sample  
54 of Belgian adults (aged 18 years and above). The U.K CoMix survey assesses contact patterns of  
55  
56  
57

1  
2  
3 a representative sample of U.K adults. Launched on March 24, 2020, participants are followed  
4 up every 2 weeks to monitor changes in their self reported behaviours (13). In Canada, the  
5 Quebec-based CONNECT study uses population-based survey to assess social contacts and  
6 mixing patterns (42). Brankston and colleagues (43) also used paid panel representative of  
7 Canadian adults to construct contact patterns and determine the impact of physical distancing  
8 measures on COVID-19 transmission. Most of these studies commissioned market research  
9 companies or used survey panels to recruit participants (8,13,20,43). While market companies or  
10 survey panels offer a convenient approach to sampling, they have some challenges. Panels are  
11 made of membership in loyalty programs or other panels constituting a select group of the  
12 population, and therefore, may not represent complete random recruitment from a population of  
13 interest.  
14  
15  
16  
17

18  
19 The use of targeted social media advertisement for participant recruitment has gained  
20 prominence in health research (19,44), having been applied in areas such as mental health (45),  
21 cannabis use (46), smoking behaviour (47) and other health related studies (48). For our survey,  
22 we use social media advertisement and other recruitment strategies. Although social media-based  
23 recruitment does not necessarily generate a random sample of the general population given the  
24 characteristics of people who are on social media may differ from those who are not, social  
25 media channels like Facebook, Instagram, Twitter, and others have powerful targeting  
26 capabilities that allow researchers to target advertisements to users with specific demographic  
27 characteristics. They also have the advantage of reaching hard-to-reach populations (49).  
28  
29  
30  
31

### 32 ***Strengths and limitations***

33  
34 The following issues should be considered for interpretation of results from BC-Mix. Some  
35 population groups are underrepresented in the survey, possibly due to the lack of access to social  
36 media. These are people who are economically marginalised and less likely to have access to a  
37 computer/electronic device or to have access to the internet or cellular data, e.g., people living in  
38 poverty, people who are unemployed, people who are unhoused, etc. Additionally, people who  
39 are in prison (sentenced or on remand) or people who are under immigration detention may not  
40 have access to the internet or cellular devices. Our survey responses may also be subject to recall  
41 bias since we ask respondents to recall contacts and other behaviours or activities from the  
42 previous day. Other studies have used diaries (17) to overcome this weakness but this may be  
43 logistically challenging and attrition with this method may be quite high. Another potential bias  
44 inherent in our survey is the issue of reporting bias, as respondents may respond in ways  
45 consistent with the laws around physical distancing. In addition, the BC-Mix is available only in  
46 English, thus excluding individuals who cannot communicate in English. This notwithstanding,  
47 according to the 2016 Census, 96.6% of BC's population indicated that they can converse in  
48 English (37). Therefore, we do not believe that any bias associated with language would be  
49 significant. Another limitation is the large number of recruits that were ineligible and the attrition  
50 between successive rounds of survey. This could be related to survey fatigue, or the time  
51  
52  
53  
54  
55  
56  
57

1  
2  
3 required to complete the survey. Also, although we used survey weights to improve the  
4 representativeness of our sample, this was by no means perfect as some differences in the  
5 distribution of some characteristics can still be observed between our weighted sample and the  
6 BC population. This limits representativeness of the sample. Additionally, although weighting  
7 ensures that a survey sample is similar to the reference population in terms of some known  
8 demographic characteristics, this does not guarantee that the weighted data on a particular  
9 outcome measure is representative, particularly in situations where the outcome measure is  
10 related to unknown factors that were not considered during weighting.  
11  
12  
13

14 Our survey has several strengths. Web-based surveys like the BC-Mix provide timely  
15 information for pandemic response (49). Also, during an infectious disease pandemic, web-based  
16 surveys offer a more convenient approach to data collection compared to in-person or other  
17 modes of data collection. We also found paid advertisements to be more cost effective compared  
18 to the cost of panel data from survey companies (44). An additional strength of our study is its  
19 large sample size. Our total recruited sample of over 61,000 participants compares to the 1,356  
20 participants in the U.K. CoMix study (13), the 9,743 participants in the BICS study (20) study,  
21 1,542 participants in the Belgian CoMix study (8) and the 7,290 participants in the POLYMOD  
22 study (17). In addition, because we opted to achieve representativeness post-data collection (at  
23 the analysis stage), we were able to consider geography and ethnicity in our weighting strategy.  
24 It would have been logistically challenging to consider these variables together with other  
25 variables had we used quota-sampling given that many market research company panels were  
26 limited in terms recruitment by age, sex, and geography. Using many auxiliary variables in our  
27 weighting strategy increased the representativeness of the BC population.  
28  
29  
30  
31  
32

### 33 **Collaboration**

34  
35 The BC-Mix will continue to collect relevant data on behaviour and contact patterns in BC to  
36 reflect the changing dynamics of the COVID-19 pandemic. The BC-Mix has an overarching  
37 governance structure. We welcome further collaboration from interested researchers. Data  
38 requests should be sent to the Principal Investigator, Dr. Naveed Z. Janjua (corresponding  
39 author).  
40  
41  
42

### 43 **Conclusion**

44  
45 To our knowledge, the BC-Mix is the first and largest surveillance tool providing real time  
46 quantitative data on mixing patterns and contact characteristics in BC and one of the largest in  
47 North America. Tools such as the BC-Mix are integral to the COVID-19 pandemic response as  
48 they provide critical data that can be used to inform the timing of loosening or re-imposition of  
49 physical distancing measures. Further analyses on contact patterns, relationship of contact  
50 patterns with transmission, disparities in contact patterns, and facemask use, are either in  
51 progress or have been published (39,40).  
52  
53  
54  
55  
56  
57

## Supporting information

S1 Table. BC-Mix variable names and definitions

S2 Table. Comparison of baseline eligible and ineligible participants, frequencies, and proportions

S3 Table. Participant profile of BC-Mix follow up surveys: frequencies and proportions (%)

S4 Table. BC-Mix eligible sample (baseline) by month recruited

S5 Table. Comparison of participant eligibility across survey rounds

S6 Table. Participant profile of BC-Mix baseline data (n=33, 650), using at least 67% survey completion threshold

S7 Table. Comparison of participants with 100% survey completion versus those with less than 100% completion (baseline data)

## Authors' contributions

**Conceptualization:** Naveed Z. Janjua, Prince A. Adu

**Survey design:** Naveed Z. Janjua, Prince A. Adu, Terri Buller-Taylor, Bushra Mahmood

**Data curation:** Prince A. Adu, Amanda Yu, Stanley Wong

**Statistical analysis:** Prince A. Adu

**Funding acquisition:** Naveed Janjua

**Methodology:** Naveed Z. Janjua, Prince A. Adu, Mawuena Binka, Terri Buller-Taylor, Bushra Mahmood, Sarafa Iyaniwura, Michael Otterstatter

**Writing first draft:** Prince A. Adu, Dahn Jeong, Mawuena Binka, Terri Buller-Taylor, Sarafa Iyaniwura, Notice Ringa

**Writing-review & editing:** Naveed Z. Janjua, Héctor A. Velásquez García, Bushra Mahmood, Makuza Jean Damascene, Mawuena Binka, James Wilton, Sofia Bartlett, Michael Otterstatter, Mike Irvine.

## Acknowledgement

The authors would like to express their gratitude to Dr Joan Hu, Department of Statistics and Actuarial Science, Simon Fraser University and Mei Chong of BC Centre for Disease Control for their methodological guidance. We are also grateful to all residents of British Columbia who participated in the British Columbia COVID-19 Population Mixing Patterns (BC-Mix) survey.

## Funding statement

This work was supported by Michael Smith Foundation for Health Research COVID-19 Research Response Fund (Award #: COV-2020-1183)



## Competing interests statement

None declared

## Figures

Figure 1. Participant flow chart for British Columbia COVID-19 population mixing patterns survey (BC-Mix) [baseline and first eight follow-up data]

## References

1. Johns Hopkins Coronavirus Resource Center. COVID-19 Map [Internet]. Johns Hopkins Coronavirus Resource Center. [cited 2021 May 23]. Available from: <https://coronavirus.jhu.edu/map.html>
2. Lu H, Stratton CW, Tang Y. Outbreak of pneumonia of unknown etiology in Wuhan, China: The mystery and the miracle. *J Med Virol*. 2020 Apr;92(4):401–2.
3. Islam N, Sharp SJ, Chowell G, Shabnam S, Kawachi I, Lacey B, et al. Physical distancing interventions and incidence of coronavirus disease 2019: natural experiment in 149 countries. *BMJ*. 2020 Jul 15;370:m2743.
4. BC Stats. 2020 Sub-Provincial Population Estimates Highlights. 2020 Jul;4.
5. Joint statement on Province of B.C.'s COVID-19 response, latest updates [BC Gov News [Internet]. 2020 [cited 2021 May 23]. Available from: <https://news.gov.bc.ca/releases/2020HLTH0089-000505>
6. Ferguson N, Laydon DJ, Nedjati Gilani G, Imai N, Ainslie KM, Baguelin M, et al. Report 9: Impact of non-pharmaceutical interventions (NPIs) to reduce COVID19 mortality and healthcare demand. 2020 Jan 1 [cited 2021 Jul 19]; Available from: <https://www.scienceopen.com/document?vid=4e6290c9-0ded-40ed-b858-ba18119863c0>
7. Zhang J, Litvinova M, Liang Y, Wang Y, Wang W, Zhao S, et al. Changes in contact patterns shape the dynamics of the COVID-19 outbreak in China. *Science*. 2020 Jun 26;368(6498):1481–6.
8. Coletti P, Wambua J, Gimma A, Willem L, Vercruyssen S, Vanhoutte B, et al. CoMix: comparing mixing patterns in the Belgian population during and after lockdown. *Sci Rep*. 2020 Dec 14;10(1):21885.
9. Sypsa V, Roussos S, Paraskevis D, Lytras T, Tsiodras S, Hatzakis A. Effects of Social Distancing Measures during the First Epidemic Wave of Severe Acute Respiratory Syndrome Infection, Greece. *Emerg Infect Dis*. 2021 Feb;27(2):452–62.
10. Quaife M, van Zandvoort K, Gimma A, Shah K, McCreesh N, Prem K, et al. The impact of COVID-19 control measures on social contacts and transmission in Kenyan informal settlements. *BMC Med*. 2020 Oct 5;18(1):316.

11. Latsuzbaia A, Herold M, Bertemes JP, Mossong J. Evolving social contact patterns during the COVID-19 crisis in Luxembourg. *PLOS ONE*. 2020 Aug 6;15(8):e0237128.
12. Backer JA, Mollema L, Vos RAE, Klinkenberg D, Klis FRM van der, Melker HE de, et al. The impact of physical distancing measures against COVID-19 transmission on contacts and mixing patterns in the Netherlands: repeated cross-sectional surveys in 2016/2017, April 2020 and June 2020. *medRxiv*. 2020 Oct 16;2020.05.18.20101501.
13. Jarvis CI, Van Zandvoort K, Gimma A, Prem K, Auzenbergs M, O'Reilly K, et al. Quantifying the impact of physical distance measures on the transmission of COVID-19 in the UK. *BMC Med*. 2020 May 7;18(1):124.
14. Verelst F, Hermans L, Vercruysse S, Gimma A, Coletti P, Backer JA, et al. SOCRATES-CoMix: a platform for timely and open-source contact mixing data during and in between COVID-19 surges and interventions in over 20 European countries. *BMC Med*. 2021 Sep 29;19(1):254.
15. Liu CY, Berlin J, Kiti MC, Del Fava E, Grow A, Zagheni E, et al. Rapid Review of Social Contact Patterns During the COVID-19 Pandemic. *Epidemiology*. 2021 Nov;32(6):781–91.
16. Davies NG, Klepac P, Liu Y, Prem K, Jit M, Eggo RM. Age-dependent effects in the transmission and control of COVID-19 epidemics. *Nat Med*. 2020 Aug;26(8):1205–11.
17. Mossong J, Hens N, Jit M, Beutels P, Auranen K, Mikolajczyk R, et al. Social Contacts and Mixing Patterns Relevant to the Spread of Infectious Diseases. *PLOS Med*. 2008 Mar 25;5(3):e74.
18. Wallinga J, Teunis P, Kretzschmar M. Using data on social contacts to estimate age-specific transmission parameters for respiratory-spread infectious agents. *Am J Epidemiol*. 2006 Nov 15;164(10):936–44.
19. Grow A, Perrotta D, Fava ED, Cimentada J, Rampazzo F, Gil-Clavel S, et al. Addressing Public Health Emergencies via Facebook Surveys: Advantages, Challenges, and Practical Considerations. *J Med Internet Res*. 2020 Dec 14;22(12):e20653.
20. Feehan DM, Mahmud AS. Quantifying population contact patterns in the United States during the COVID-19 pandemic. *Nat Commun*. 2021 Feb 9;12(1):893.
21. Qualtrics. Qualtrics [Internet]. Provo, Utah, USA: Qualtrics; 2021. Available from: <https://www.qualtrics.com>
22. Ajzen I, Fishbein M. Understanding attitudes and predicting social behavior Prentice-Hall Inc. Englewood Cliffs, NJ; 1980.
23. Ajzen I. From Intentions to Actions: A Theory of Planned Behavior. In: Kuhl J, Beckmann J, editors. *Action Control: From Cognition to Behavior* [Internet]. Berlin, Heidelberg: Springer; 1985 [cited 2021 Jun 15]. p. 11–39. (SSSP Springer Series in Social Psychology). Available from: [https://doi.org/10.1007/978-3-642-69746-3\\_2](https://doi.org/10.1007/978-3-642-69746-3_2)



- 1
  - 2
  - 3
  - 4
  - 5
  - 6
  - 7
  - 8
  - 9
  - 10
  - 11
  - 12
  - 13
  - 14
  - 15
  - 16
  - 17
  - 18
  - 19
  - 20
  - 21
  - 22
  - 23
  - 24
  - 25
  - 26
  - 27
  - 28
  - 29
  - 30
  - 31
  - 32
  - 33
  - 34
  - 35
  - 36
  - 37
  - 38
  - 39
  - 40
  - 41
  - 42
  - 43
  - 44
  - 45
  - 46
  - 47
  - 48
  - 49
  - 50
  - 51
  - 52
  - 53
  - 54
  - 55
  - 56
  - 57
  - 58
  - 59
  - 60
24. Ajzen I. The theory of planned behavior. *Organ Behav Hum Decis Process*. 1991 Dec 1;50(2):179–211.
25. Becker MH. The health belief model and personal health behavior. *Health Educ Monogr*. 1974;2:324–473.
26. Fishbein M, Ajzen I. *Belief, Attitude, Intention, and Behavior: An Introduction to Theory and Research*. Reading, MA: Addison-Wesley; 1975.
27. Sheppard BH, Hartwick J, Warshaw PR. The Theory of Reasoned Action: A Meta-Analysis of Past Research with Recommendations for Modifications and Future Research. *J Consum Res*. 1988 Dec 1;15(3):325–43.
28. Bogoch II, Watts A, Thomas-Bachli A, Huber C, Kraemer MUG, Khan K. Pneumonia of unknown aetiology in Wuhan, China: potential for international spread via commercial air travel. *J Travel Med*. 2020 Mar 13;27(2).
29. Fisher WA, Kohut T, Salisbury CMA, Salvadori MI. Understanding human papillomavirus vaccination intentions: comparative utility of the theory of reasoned action and the theory of planned behavior in vaccine target age women and men. *J Sex Med*. 2013 Oct;10(10):2455–64.
30. Santos AJ, Kislaya I, Machado A, Nunes B. Beliefs and attitudes towards the influenza vaccine in high-risk individuals. *Epidemiol Infect*. 2017 Jul;145(9):1786–96.
31. Teitler-Regev S, Shahrabani S, Benzion U. Factors Affecting Intention among Students to Be Vaccinated against A/H1N1 Influenza: A Health Belief Model Approach. *Adv Prev Med*. 2011 Dec 20;2011:e353207.
32. Wong MCS, Wong ELY, Huang J, Cheung AWL, Law K, Chong MKC, et al. Acceptance of the COVID-19 vaccine based on the health belief model: A population-based survey in Hong Kong. *Vaccine*. 2021 Feb 12;39(7):1148–56.
33. Wambua J, Hermans L, Coletti P, Verelst F, Willem L, Jarvis C, et al. The influence of risk perceptions on close contact frequency during the SARS-CoV-2 pandemic [Internet]. In *Review*; 2021 Nov [cited 2022 Mar 16]. Available from: <https://www.researchsquare.com/article/rs-996488/v1>
34. Bureau d'information et d'études En Santé Des Populations (BIESP). Deprivation Index [Internet]. INSPQ. 2019 [cited 2021 May 27]. Available from: <https://www.inspq.qc.ca/en/deprivation/material-and-social-deprivation-index>
35. Leung K, Jit M, Lau EHY, Wu JT. Social contact patterns relevant to the spread of respiratory infectious diseases in Hong Kong. *Sci Rep*. 2017 Aug 11;7(1):7974.
36. Bethlehem JG. *Applied survey methods: a statistical perspective*. Hoboken, N.J: Wiley; 2009. 375 p. (Wiley series in survey methodology).

- 1  
2  
3 37. Government of Canada SC. Census Profile, 2016 Census - British Columbia [Province] and  
4 Canada [Country] [Internet]. 2017 [cited 2021 Jul 25]. Available from:  
5 [https://www12.statcan.gc.ca/census-recensement/2016/dp-  
8 pd/prof/details/page.cfm?Lang=E&Geo1=PR&Code1=59&Geo2=PR&Code2=01&Search  
9 Text=Canada&SearchType=Begins&SearchPR=01&B1=All&type=0](https://www12.statcan.gc.ca/census-recensement/2016/dp-<br/>6 pd/prof/details/page.cfm?Lang=E&Geo1=PR&Code1=59&Geo2=PR&Code2=01&Search<br/>7 Text=Canada&SearchType=Begins&SearchPR=01&B1=All&type=0)
- 10 38. BC Centre for Disease Control. Epidemiology & Modelling Presentations [Internet]. [cited  
11 2022 Apr 12]. Available from: [http://www.bccdc.ca/health-info/diseases-conditions/covid-  
13 19/modelling-projections](http://www.bccdc.ca/health-info/diseases-conditions/covid-<br/>12 19/modelling-projections)
- 14 39. Iyaniwura SA, Falcão RC, Ringa N, Adu PA, Spencer M, Taylor M, et al. Mathematical  
15 modeling of COVID-19 in British Columbia: An age-structured model with time-dependent  
16 contact rates. *Epidemics*. 2022 Apr 9;100559.
- 17 40. Ringa N, Otterstatter MC, Iyaniwura SA, Irvine MA, Adu P, Janjua NZ, et al. Social  
18 contacts and transmission of COVID-19 in British Columbia, Canada. *Front Public Health*  
19 [Internet]. 2022 [cited 2021 Sep 28]; Available from:  
20 <https://www.frontiersin.org/articles/10.3389/fpubh.2022.867425/abstract>
- 21 41. BC Centre for Disease Control. What We Do [Internet]. [cited 2021 Jun 10]. Available  
22 from: <http://www.bccdc.ca/about/what-we-do>
- 23 42. Institut national de, santé publique du Québec. CONNECT : étude des contacts sociaux des  
24 Québécois - 27 avril 2021 [Internet]. INSPQ. [cited 2021 Jun 17]. Available from:  
25 <https://www.inspq.qc.ca/covid-19/donnees/connect/27-avril-2021>
- 26 43. Brankston G, Merkley E, Fisman DN, Tuite AR, Poljak Z, Loewen PJ, et al. Quantifying  
27 Contact Patterns in Response to COVID-19 Public Health Measures in Canada. *medRxiv*.  
28 2021 Mar 12;2021.03.11.21253301.
- 29 44. Thornton L, Batterham PJ, Fassnacht DB, Kay-Lambkin F, Calear AL, Hunt S. Recruiting  
30 for health, medical or psychosocial research using Facebook: Systematic review. *Internet  
31 Interv*. 2016 May 1;4:72–81.
- 32 45. Choi I, Milne DN, Glozier N, Peters D, Harvey SB, Calvo RA. Using different Facebook  
33 advertisements to recruit men for an online mental health study: Engagement and selection  
34 bias. *Internet Interv*. 2017 Jun 1;8:27–34.
- 35 46. Borodovsky JT, Marsch LA, Budney AJ. Studying Cannabis Use Behaviors With Facebook  
36 and Web Surveys: Methods and Insights. *JMIR Public Health Surveill*. 2018 May  
37 2;4(2):e9408.
- 38 47. Ramo DE, Prochaska JJ. Broad Reach and Targeted Recruitment Using Facebook for an  
39 Online Survey of Young Adult Substance Use. *J Med Internet Res*. 2012 Feb  
40 23;14(1):e1878.

- 1  
2  
3 48. Fazzino TL, Rose GL, Pollack SM, Helzer JE. Recruiting U.S. and Canadian College  
4 Students via Social Media for Participation in a Web-Based Brief Intervention Study. *J Stud*  
5 *Alcohol Drugs*. 2015 Jan 1;76(1):127–32.  
6  
7  
8 49. Hlatshwako TG, Shah SJ, Kosana P, Adebayo E, Hendriks J, Larsson EC, et al. Online  
9 health survey research during COVID-19. *Lancet Digit Health*. 2021 Feb 1;3(2):e76–7.  
10  
11  
12  
13  
14  
15  
16  
17  
18  
19  
20  
21  
22  
23  
24  
25  
26  
27  
28  
29  
30  
31  
32  
33  
34  
35  
36  
37  
38  
39  
40  
41  
42  
43  
44  
45  
46  
47  
48  
49  
50  
51  
52  
53  
54  
55  
56  
57  
58  
59  
60

For peer review only

**Table 1.** Participant profile of BC-Mix baseline data (n=41,375), September 04, 2020-July 26, 2021

|                          |                                            | Survey                |                               |                    |            | British Columbia population |              |
|--------------------------|--------------------------------------------|-----------------------|-------------------------------|--------------------|------------|-----------------------------|--------------|
|                          |                                            | Un-weighted frequency | Un-weighted % (excl. missing) | Weighted frequency | Weighted % | Population frequency        | Population % |
| <b>Sex</b>               |                                            |                       |                               |                    |            |                             |              |
|                          | Male                                       | 6,823                 | 16.5                          | 21,293             | 50.0       | 1,805,105                   | 48.5         |
|                          | Female                                     | 34,552                | 83.5                          | 21,261             | 50.0       | 1,914,755                   | 51.5         |
|                          | Missing                                    |                       |                               |                    |            |                             |              |
| <b>Age</b>               |                                            |                       |                               |                    |            |                             |              |
|                          | 18-34                                      | 4,978                 | 12.0                          | 11,575             | 27.2       | 1,002,745                   | 27           |
|                          | 35-54                                      | 12,110                | 29.3                          | 14,194             | 33.4       | 1,251,835                   | 33.7         |
|                          | 55+                                        | 24,287                | 58.7                          | 16,784             | 39.4       | 1,465,280                   | 39.4         |
| <b>Race/ethnicity</b>    |                                            |                       |                               |                    |            |                             |              |
|                          | Indigenous                                 | 1,757                 | 4.4                           | 2,180              | 5.3        | 186,705                     | 5            |
|                          | Chinese                                    | 882                   | 2.2                           | 4,451              | 10.9       | 418,035                     | 11.2         |
|                          | White                                      | 35,026                | 87.5                          | 26,383             | 64.6       | 2,448,155                   | 65.8         |
|                          | South Asian                                | 606                   | 1.5                           | 3,473              | 8.5        | 280,470                     | 7.5          |
|                          | Other                                      | 1,766                 | 4.4                           | 4,352              | 10.7       | 386,495                     | 10.4         |
|                          | Missing/Unknown                            | 1,338                 | n/a                           | n/a                | n/a        | n/a                         | n/a          |
| <b>Health region</b>     |                                            |                       |                               |                    |            |                             |              |
|                          | Fraser Health                              | 8,451                 | 26.1                          | 11,793             | 36.2       | 1,347,410                   | 36.2         |
|                          | Interior Health                            | 6,143                 | 19.0                          | 5,336              | 16.4       | 595,105                     | 16           |
|                          | Northern Island                            | 1,825                 | 5.6                           | 1,828              | 5.6        | 213,235                     | 5.7          |
|                          | Vancouver Coastal                          | 7,315                 | 22.6                          | 8,118              | 24.9       | 934,055                     | 25.1         |
|                          | Vancouver Island                           | 8,640                 | 26.7                          | 5,535              | 17.0       | 630,055                     | 16.9         |
|                          | Missing/Unknown                            | 9,001                 | n/a                           | n/a                | n/a        | n/a                         | n/a          |
| <b>Education</b>         |                                            |                       |                               |                    |            |                             |              |
|                          | Below high school                          | 807                   | 2.5                           | 1,096              | 3.0        | 2,301,030                   | 12.5         |
|                          | Below bachelor                             | 16,928                | 51.7                          | 15,176             | 47.0       | 466,295                     | 61.9         |
|                          | University degree                          | 15,029                | 45.9                          | 16,273             | 50.0       | 952,535                     | 25.6         |
|                          | Missing/Unknown                            | 8,611                 | n/a                           | n/a                | n/a        | n/a                         | n/a          |
| <b>Employment status</b> |                                            |                       |                               |                    |            |                             |              |
|                          | Employed full-time (30 hours or more/week) | 10,654                | 32.0                          | 13,608             | 40.8       | n/a                         | n/a          |
|                          | Employed part-time                         | 2,993                 | 9.0                           | 3,131              | 9.4        | n/a                         | n/a          |

|  |                                      | Survey                |                               |                    |            | British Columbia population |              |
|--|--------------------------------------|-----------------------|-------------------------------|--------------------|------------|-----------------------------|--------------|
|  |                                      | Un-weighted frequency | Un-weighted % (excl. missing) | Weighted frequency | Weighted % | Population frequency        | Population % |
|  | Self-employed                        | 2,704                 | 8.1                           | 3,013              | 9.0        | n/a                         | n/a          |
|  | Unemployed but looking for a job     | 952                   | 2.9                           | 1,522              | 4.6        | n/a                         | n/a          |
|  | Unemployed and not looking for a job | 406                   | 1.2                           | 510                | 1.5        | n/a                         | n/a          |
|  | Full-time parent, homemaker          | 879                   | 2.6                           | 740                | 2.2        | n/a                         | n/a          |
|  | Retired                              | 12,757                | 38.3                          | 8,096              | 24.3       | n/a                         | n/a          |
|  | Student/Pupil                        | 566                   | 1.7                           | 1,197              | 3.6        | n/a                         | n/a          |
|  | Long-term sick or disabled           | 968                   | 2.9                           | 914                | 2.7        | n/a                         | n/a          |
|  | Prefer not to answer                 | 424                   | 1.3                           | 619                | 1.9        | n/a                         | n/a          |
|  | Missing/Unknown                      | 8,072                 | n/a                           | n/a                | n/a        | n/a                         | n/a          |
|  | <b>Material Deprivation Index</b>    |                       |                               |                    |            |                             |              |
|  | 1 (Privileged)                       | 6,407                 | 22.3                          | 6,100              | 21.8       | n/a                         | n/a          |
|  | 2                                    | 6,475                 | 22.5                          | 5,873              | 21.1       | n/a                         | n/a          |
|  | 3                                    | 6,972                 | 24.2                          | 6,010              | 21.6       | n/a                         | n/a          |
|  | 4                                    | 4,822                 | 16.8                          | 5,187              | 18.7       | n/a                         | n/a          |
|  | 5 (Deprived)                         | 4,085                 | 14.2                          | 4,656              | 16.8       | n/a                         | n/a          |
|  | Missing                              | 1,2614                | n/a                           | n/a                | n/a        | n/a                         | n/a          |
|  | <b>Follow up consent</b>             |                       |                               |                    |            |                             |              |
|  | Yes                                  | 20,633                | 63.8                          | 19,051             | 58.9       | n/a                         | n/a          |
|  | No                                   | 11,689                | 36.2                          | 13,275             | 41.1       | n/a                         | n/a          |
|  | Missing                              | 9,053                 | n/a                           | n/a                | n/a        | n/a                         | n/a          |
|  | <b>Data linkage consent</b>          |                       |                               |                    |            |                             |              |
|  | Yes                                  | 7,290                 | 27.3                          | 7,318              | 26.4       | n/a                         | n/a          |
|  | No                                   | 19,467                | 72.8                          | 20,362             | 73.6       | n/a                         | n/a          |
|  | Missing                              | 14,618                | n/a                           | n/a                | n/a        | n/a                         | n/a          |

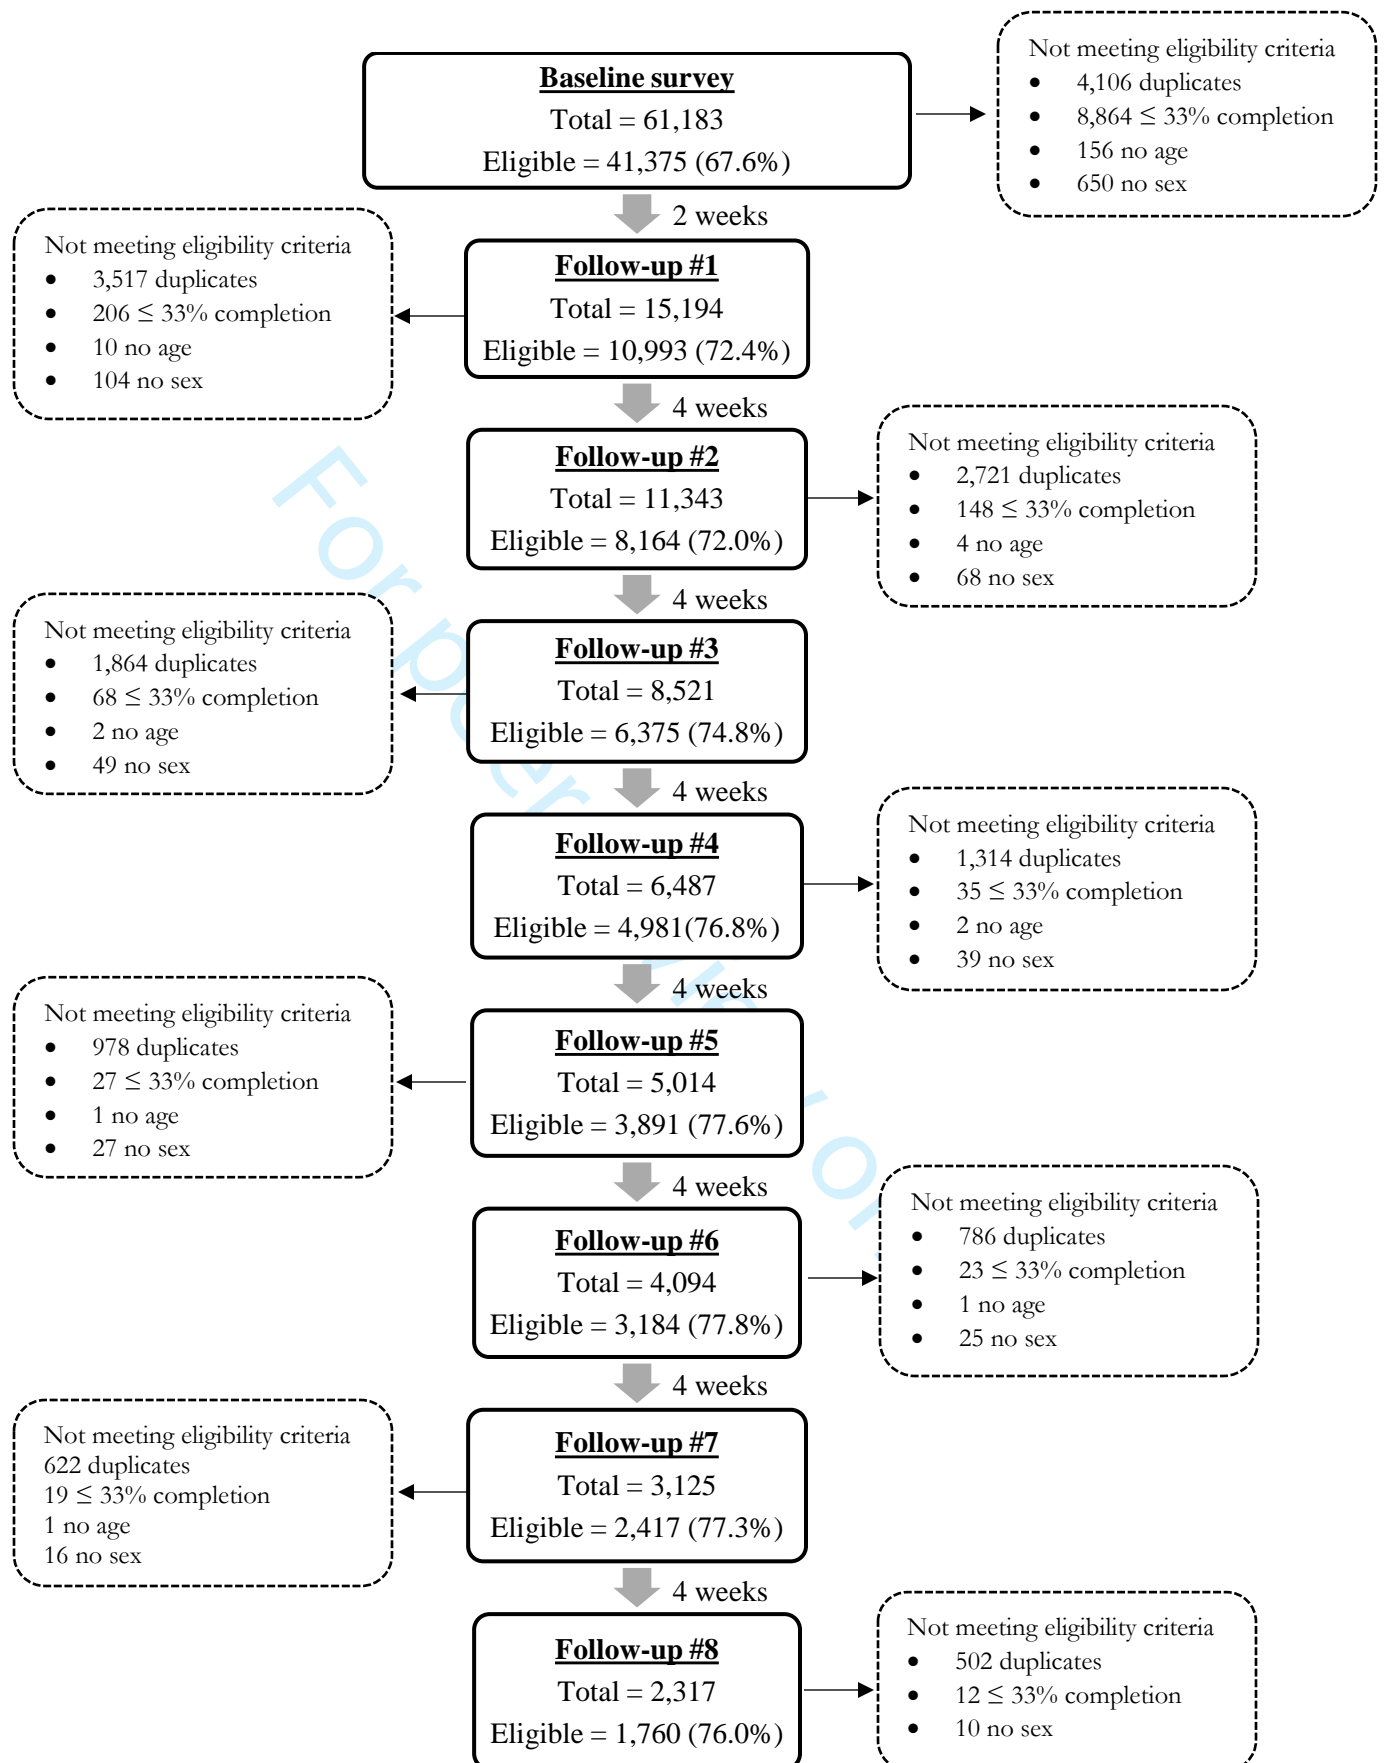

## Supplementary files

### Quantifying contact patterns: development and characteristics of the British Columbia COVID-19 population mixing patterns survey (BC-Mix)

Prince A. Adu<sup>1,2</sup>, Mawuena Binka<sup>1</sup>, Bushra Mahmood,<sup>3</sup> Dahn Jeong<sup>1,2</sup>, Terri Buller-Taylor<sup>1</sup>, Makuza Jean Damascene<sup>1,2</sup>, Sarafa Iyaniwura<sup>1,4</sup>, Notice Ringa<sup>1,2</sup>, Héctor A. Velásquez García<sup>1,2</sup>, Stanley Wong<sup>1</sup>, Amanda Yu<sup>1</sup>, Sofia Bartlett<sup>1,6</sup>, James Wilton<sup>1</sup>, Mike A. Irvine<sup>1,7</sup>, Michael Otterstatter<sup>1,2</sup>, Naveed Z. Janjua<sup>1,2,8</sup>

<sup>1</sup>British Columbia Centre for Disease Control, Vancouver, British Columbia, Canada

<sup>2</sup>School of Population and Public Health, University of British Columbia, Vancouver, British Columbia, Canada

<sup>3</sup>Department of Medicine, University of British Columbia, Vancouver, British Columbia, Canada

<sup>4</sup>Department of Mathematics and Institute of Applied Mathematics, University of British Columbia, Vancouver, British Columbia, Canada

<sup>5</sup>Faculty of Health Sciences, Simon Fraser University, Burnaby, British Columbia, Canada

<sup>6</sup>Department of Pathology and Laboratory Medicine, Vancouver, British Columbia, Canada

<sup>7</sup>Faculty of Health Sciences, Simon Fraser University, Burnaby, British Columbia, Canada

<sup>8</sup>Centre for Health Evaluation & Outcome Sciences, St. Paul's Hospital, Vancouver, British Columbia, Canada



**S1 Table:** BC-Mix variable names and definitions

| Domain                                    | Variable                                                                                                                          | Definition                                                                                                                                                                                                                                                                                                                                                                                                                                                                                                                                                                                                                                              | Included in follow up? (Yes/No)          |
|-------------------------------------------|-----------------------------------------------------------------------------------------------------------------------------------|---------------------------------------------------------------------------------------------------------------------------------------------------------------------------------------------------------------------------------------------------------------------------------------------------------------------------------------------------------------------------------------------------------------------------------------------------------------------------------------------------------------------------------------------------------------------------------------------------------------------------------------------------------|------------------------------------------|
| Demographic information                   |                                                                                                                                   |                                                                                                                                                                                                                                                                                                                                                                                                                                                                                                                                                                                                                                                         | Yes (First name, last name, E-mail only) |
|                                           | Age, sex, gender, ethnicity, first name, last name, personal health number, postal code, employment status, education, occupation | Age, sex, gender, ethnicity, first name, last name, E-mail, personal health number, postal code, employment status, education, occupation of respondent                                                                                                                                                                                                                                                                                                                                                                                                                                                                                                 |                                          |
|                                           | Number of adults living in respondent's household                                                                                 | How many adults live in your household?                                                                                                                                                                                                                                                                                                                                                                                                                                                                                                                                                                                                                 |                                          |
|                                           | Number of children living in respondent's household                                                                               | How many children (under 18 years) live in your household?                                                                                                                                                                                                                                                                                                                                                                                                                                                                                                                                                                                              |                                          |
| Perceptions and attitudes around COVID-19 |                                                                                                                                   |                                                                                                                                                                                                                                                                                                                                                                                                                                                                                                                                                                                                                                                         | No                                       |
|                                           | Satisfaction with provincial COVID-19 response                                                                                    | How satisfied are you with how COVID-19 has been managed in the province?                                                                                                                                                                                                                                                                                                                                                                                                                                                                                                                                                                               |                                          |
|                                           | Knowledge of COVID-19                                                                                                             | How much do you know about COVID-19?                                                                                                                                                                                                                                                                                                                                                                                                                                                                                                                                                                                                                    |                                          |
|                                           | Attitude to COVID-19 #1                                                                                                           | To what extent do you agree or disagree with the following statements? - 1) COVID-19 would be a serious illness for me if I caught it 2) I think I am likely to catch COVID-19 3) If I don't follow government advice, I might spread COVID-19 to someone who is vulnerable. 4) My boss expects me to work when I am feeling unwell or sick 5) If I could not work because of COVID-19, I would still get paid 6) If I had to isolate myself for 14 days because of COVID-19, I would have enough food and supplies for 14 days 7) If I had to isolate myself for 14 days because of COVID-19... - Someone else would be able to look after my children |                                          |
|                                           | Attitude to COVID-19 #2                                                                                                           | How effective do you think the following are at slowing the spread of COVID-19? -1) Meeting up with fewer people than normal 2) Avoiding crowded spaces 3) Staying at home for 14 days if you have ... - Severe symptoms (e.g., severe cough or high temperature).                                                                                                                                                                                                                                                                                                                                                                                      |                                          |
|                                           | Attitude to COVID-19 #3                                                                                                           | How much, if at all, have you changed the number of face-to-face interactions with other people as a result of the COVID19 pandemic?                                                                                                                                                                                                                                                                                                                                                                                                                                                                                                                    |                                          |
|                                           | Attitude to COVID-19 #4                                                                                                           | How well do you think you are doing at keeping physically distanced from people outside your home?                                                                                                                                                                                                                                                                                                                                                                                                                                                                                                                                                      |                                          |
|                                           | Attitude to COVID-19 #5                                                                                                           | How concerned are you personally about the spread of COVID19?                                                                                                                                                                                                                                                                                                                                                                                                                                                                                                                                                                                           |                                          |
| Attitude toward COVID-19 vaccine          |                                                                                                                                   |                                                                                                                                                                                                                                                                                                                                                                                                                                                                                                                                                                                                                                                         | Yes                                      |
|                                           | Vaccination status (1st or 2nd shot)                                                                                              | Have you received the COVID-19 vaccine (either 1st or 2nd shot)?                                                                                                                                                                                                                                                                                                                                                                                                                                                                                                                                                                                        |                                          |
|                                           | Date of 1st shot                                                                                                                  | When did you receive your 1st COVID-19 vaccine shot?                                                                                                                                                                                                                                                                                                                                                                                                                                                                                                                                                                                                    |                                          |
|                                           | Vaccination status (2nd shot)                                                                                                     | Have you received your 2nd COVID-19 vaccine shot?                                                                                                                                                                                                                                                                                                                                                                                                                                                                                                                                                                                                       |                                          |

|                                                               |                           |                                                                                                                                                                                                                                                                                                                                                                                                                             |     |
|---------------------------------------------------------------|---------------------------|-----------------------------------------------------------------------------------------------------------------------------------------------------------------------------------------------------------------------------------------------------------------------------------------------------------------------------------------------------------------------------------------------------------------------------|-----|
|                                                               | Date of 2nd shot          | When did you receive your 2nd COVID-19 vaccine shot?                                                                                                                                                                                                                                                                                                                                                                        |     |
|                                                               | Perceived risk            | I believe I am at risk of becoming infected with COVID-19.                                                                                                                                                                                                                                                                                                                                                                  |     |
|                                                               | Perceived susceptibility  | With the way my life is, I believe I am at a high risk of getting COVID-19 (e.g., risks at my work, recreational activities, people I live with, etc.)                                                                                                                                                                                                                                                                      |     |
|                                                               | Perceived protection 1    | I believe a COVID-19 Vaccine will protect me from getting the virus.                                                                                                                                                                                                                                                                                                                                                        |     |
|                                                               | Perceived protection 2    | I believe a COVID-19 vaccine will decrease my chance of getting seriously ill from COVID-19.                                                                                                                                                                                                                                                                                                                                |     |
|                                                               | Trust                     | I do not trust the COVID-19 vaccine.                                                                                                                                                                                                                                                                                                                                                                                        |     |
|                                                               | Effectiveness             | I am concerned about the effectiveness of the COVID-19 vaccination.                                                                                                                                                                                                                                                                                                                                                         |     |
|                                                               | Safety                    | I am concerned about the safety of the COVID-19 vaccination.                                                                                                                                                                                                                                                                                                                                                                |     |
|                                                               | Subjective norm 1         | Most of the people I know are getting or have received the COVID-19 vaccine.                                                                                                                                                                                                                                                                                                                                                |     |
|                                                               | Subjective norm 2         | Most of the people who are important to me (my family, relatives and/or friends) think I should get the COVID-19 vaccine.                                                                                                                                                                                                                                                                                                   |     |
|                                                               | Access                    | If I choose to get the COVID-19 vaccine, I believe it will be easy to get it.                                                                                                                                                                                                                                                                                                                                               |     |
|                                                               | Intention                 | I plan to get the COVID-19 vaccine.                                                                                                                                                                                                                                                                                                                                                                                         |     |
| COVID-19 testing and results, symptoms, and health behaviours |                           |                                                                                                                                                                                                                                                                                                                                                                                                                             | Yes |
|                                                               | COVID symptoms            | Since, January 2020, have you had any of the following symptoms? Check all that apply: headache, fever, stuffy nose/congestion, loss of smell or taste, new or worsening cough, difficulty breathing/shortness of breath, confusion, vomiting, chills, weakness, muscle pain, fatigue, nausea, diarrhea                                                                                                                     |     |
|                                                               | Date of first symptoms    | When did your first symptom start? (date)                                                                                                                                                                                                                                                                                                                                                                                   |     |
|                                                               | Action following symptoms | Have you done any of the following for these symptoms? (Please check all that apply). Called family doctor/ GP, visited family doctor's /GP office, visited community/public health clinic, been admitted to hospital etc.                                                                                                                                                                                                  |     |
|                                                               | Actions before symptoms   | Before these symptoms, had you been in close contact with anyone who either: (A) had any of those symptoms [fever, new or worsening cough, headache, chills, weakness, muscle pain, stuffy nose/congestion, sore throat, difficulty breathing/shortness of breath, nausea, diarrhea, fatigue, loss of smell or taste, confusion, vomiting]; OR (B) was diagnosed positive for COVID-19 within 14 days before you felt sick? |     |
|                                                               | Isolation before symptoms | Did you isolate, or stay away from your workplace or educational facility?                                                                                                                                                                                                                                                                                                                                                  |     |
|                                                               | COVID-19 test             | Have you been tested for COVID-19?                                                                                                                                                                                                                                                                                                                                                                                          |     |
|                                                               | Test results              | Did you test positive for COVID-19?                                                                                                                                                                                                                                                                                                                                                                                         |     |

|                                                     |                               |                                                                                                                                                                                                                                                                                                                                                                    |     |
|-----------------------------------------------------|-------------------------------|--------------------------------------------------------------------------------------------------------------------------------------------------------------------------------------------------------------------------------------------------------------------------------------------------------------------------------------------------------------------|-----|
|                                                     | Household symptoms            | Has anyone in your household either: (A) had any of the following symptoms: fever, new or worsening cough, headache, chills, weakness, muscle pain, stuffy nose/congestion, sore throat, difficulty breathing/shortness of breath, nausea, diarrhea, fatigue, loss of smell or taste, confusion, vomiting; OR (B) tested positive for COVID-19 since January 2020? |     |
|                                                     | First symptoms date           | When did their first symptom start? If you don't remember, please make your best guess.                                                                                                                                                                                                                                                                            |     |
|                                                     | Household isolation           | Has anyone in your household been told to quarantine, isolate, or limit time at their school or workplace since January 2020 because: they were sick or exposed to someone with COVID-19?                                                                                                                                                                          |     |
|                                                     | Adherence                     | Did they follow the advice and isolate, quarantine, or stay away from their workplace or educational facility?                                                                                                                                                                                                                                                     |     |
| Activities and behaviour in and outside of the home |                               |                                                                                                                                                                                                                                                                                                                                                                    | Yes |
|                                                     | Movement out of home          | How many times did you leave your home (or property, apartment) yesterday?                                                                                                                                                                                                                                                                                         |     |
|                                                     | Place of movement             | Where did you go when you left your home? (Check all that apply) - Another person's home, a workplace, a hospital, doctor's office etc.                                                                                                                                                                                                                            |     |
|                                                     | Distance                      | What is the farthest distance that you went from your home yesterday?                                                                                                                                                                                                                                                                                              |     |
|                                                     | Means of transport            | How did you travel when you left your home? (Check all that apply) - Selected Choice - I only walked (I did not use other transportation)                                                                                                                                                                                                                          |     |
|                                                     | Face mask use                 | Did you use a face mask yesterday?                                                                                                                                                                                                                                                                                                                                 |     |
|                                                     | Face mask use location        | Where did you use your face mask yesterday? (Check all that apply) - Selected Choice - Everywhere outside my house                                                                                                                                                                                                                                                 |     |
|                                                     | Mask use duration             | Take your best guess for the total amount of time you wore a mask yesterday (hours and minutes)?                                                                                                                                                                                                                                                                   |     |
|                                                     | Presence at home              | In the last 3 hours, have you been in your home?                                                                                                                                                                                                                                                                                                                   |     |
|                                                     | Handwashing                   | In the last 3 hours, have many times did you wash your hands with soap?                                                                                                                                                                                                                                                                                            |     |
|                                                     | Hand sanitizer                | In the last 3 hours, how many times did you use hand sanitizer?                                                                                                                                                                                                                                                                                                    |     |
|                                                     | Transport type                | Yesterday, which type of public transportation did you use? (Please check all that apply) - Selected Choice - Airplane, bus, taxi etc                                                                                                                                                                                                                              |     |
|                                                     | Transport duration            | Yesterday, for about how long were you on public transportation?                                                                                                                                                                                                                                                                                                   |     |
|                                                     | PPE use during transportation | Yesterday, did you wear any of the following while on public transportation? (Please check all that apply) - Selected Choice - A face mask or other covering over your nose and mouth (e.g., face shield, bandana), gloves, etc.                                                                                                                                   |     |
|                                                     | Travel outside Canada         | Have you travelled outside Canada at all since Jan 2020? And if so, to where? - Selected Choice                                                                                                                                                                                                                                                                    |     |

|                                                     |                                                                                                                                                                                                       |                                                                                                                                                                                                                                                                                                                                                                                                                                                                                                                                                                                                                                                                |     |
|-----------------------------------------------------|-------------------------------------------------------------------------------------------------------------------------------------------------------------------------------------------------------|----------------------------------------------------------------------------------------------------------------------------------------------------------------------------------------------------------------------------------------------------------------------------------------------------------------------------------------------------------------------------------------------------------------------------------------------------------------------------------------------------------------------------------------------------------------------------------------------------------------------------------------------------------------|-----|
|                                                     | Number of contacts                                                                                                                                                                                    | Now we would like to ask you some questions about people you had in-person, face-to-face contact with yesterday. By in-person, face-to-face contact, we mean EITHER: A. An in-person two-way conversation with three or more words OR B. Physical skin-to-skin contact (for example, a handshake, hug, kiss, or contact sports). This includes family members, friends, co-workers, people you spoke to in shops, bus drivers, strangers, etc... and people of ALL ages. Please do not count people you contacted only with things like telephone, text, or online. How many people did you have in-person contact with between 5 am yesterday and 5 am today? |     |
|                                                     | Contact identifier #1 to #10                                                                                                                                                                          | Please add a non-identifying "nickname" for each of the people you had face-to-face or physical contact with (e.g., DG, checkout person, bus driver, child #2). This "nickname" will help you to answer questions about this contact. - 1st person label                                                                                                                                                                                                                                                                                                                                                                                                       |     |
|                                                     | Characteristics of contact #1 (gender, age, relationship to respondent)                                                                                                                               | For the people you "nicknamed" and had in-person contact with between 5am yesterday and 5am today... - I believe this person identifies as... [indicate gender, age, relationship to you, location of contact,                                                                                                                                                                                                                                                                                                                                                                                                                                                 |     |
|                                                     | Characteristics of contact #2                                                                                                                                                                         | Distance during contact, duration of contact, contact prior to COVID-19, PPE use during contact, distance during contact)                                                                                                                                                                                                                                                                                                                                                                                                                                                                                                                                      |     |
|                                                     | Location of contact of 10+ contacts                                                                                                                                                                   | You said you had more than 10 in-person contacts. Where did majority of these contacts take place?                                                                                                                                                                                                                                                                                                                                                                                                                                                                                                                                                             |     |
|                                                     | Occupational setting of 10+ contact                                                                                                                                                                   | You said you had more than 10 in-person contacts. Which of these best describes your work/occupation or the other person's workplace where these contacts took place?                                                                                                                                                                                                                                                                                                                                                                                                                                                                                          |     |
|                                                     | Age-group of contacts of 10+ contacts                                                                                                                                                                 | You said you had more than 10 in-person contacts. What was the age-group for most of these contacts you interacted with?                                                                                                                                                                                                                                                                                                                                                                                                                                                                                                                                       |     |
|                                                     | Duration of 10+ contact                                                                                                                                                                               | You said you had more than 10 in-person contacts. For most of these contacts, about how long did each contact last?                                                                                                                                                                                                                                                                                                                                                                                                                                                                                                                                            |     |
| Internet and social media use and other information |                                                                                                                                                                                                       |                                                                                                                                                                                                                                                                                                                                                                                                                                                                                                                                                                                                                                                                | No  |
|                                                     | Internet use                                                                                                                                                                                          | About how often do you use the internet?                                                                                                                                                                                                                                                                                                                                                                                                                                                                                                                                                                                                                       |     |
|                                                     | Social media use                                                                                                                                                                                      | Thinking about the social media sites that you use; about how often do you visit or use each of the following? - Facebook, Instagram, Twitter, Snapchat, YouTube                                                                                                                                                                                                                                                                                                                                                                                                                                                                                               |     |
|                                                     | Survey start date, survey end date, IP address, survey duration, response ID, recorded date, respondent's first and last name, location latitude, location longitude, follow up consent, draw consent | Survey start date, survey end date, IP address, survey duration, response ID, recorded date, respondent's first and last name, location latitude, location longitude, follow up consent, draw consent                                                                                                                                                                                                                                                                                                                                                                                                                                                          |     |
| <b>Derived variables</b>                            |                                                                                                                                                                                                       |                                                                                                                                                                                                                                                                                                                                                                                                                                                                                                                                                                                                                                                                | Yes |

|    |                           |                                                                                                                                                                                                                                                                                                                                                                                                                                                                                                                                                                     |  |
|----|---------------------------|---------------------------------------------------------------------------------------------------------------------------------------------------------------------------------------------------------------------------------------------------------------------------------------------------------------------------------------------------------------------------------------------------------------------------------------------------------------------------------------------------------------------------------------------------------------------|--|
| 1  |                           |                                                                                                                                                                                                                                                                                                                                                                                                                                                                                                                                                                     |  |
| 2  |                           |                                                                                                                                                                                                                                                                                                                                                                                                                                                                                                                                                                     |  |
| 3  |                           |                                                                                                                                                                                                                                                                                                                                                                                                                                                                                                                                                                     |  |
| 4  | Health Authority          | The health authority of respondent. This was derived using respondents postal code or location data.                                                                                                                                                                                                                                                                                                                                                                                                                                                                |  |
| 5  |                           |                                                                                                                                                                                                                                                                                                                                                                                                                                                                                                                                                                     |  |
| 6  | Quebec material index     | The material deprivation involves deprivation of the goods and conveniences that are part of modern life, such as adequate housing, possession of a car, access to high-speed internet, or a neighbourhood with recreational areas. This deprivation marks the consequences of lack of material resources associated with low education, insecure job situation and insufficient income (1,2).                                                                                                                                                                      |  |
| 7  |                           |                                                                                                                                                                                                                                                                                                                                                                                                                                                                                                                                                                     |  |
| 8  |                           |                                                                                                                                                                                                                                                                                                                                                                                                                                                                                                                                                                     |  |
| 9  |                           |                                                                                                                                                                                                                                                                                                                                                                                                                                                                                                                                                                     |  |
| 10 |                           |                                                                                                                                                                                                                                                                                                                                                                                                                                                                                                                                                                     |  |
| 11 |                           |                                                                                                                                                                                                                                                                                                                                                                                                                                                                                                                                                                     |  |
| 12 |                           |                                                                                                                                                                                                                                                                                                                                                                                                                                                                                                                                                                     |  |
| 13 |                           |                                                                                                                                                                                                                                                                                                                                                                                                                                                                                                                                                                     |  |
| 14 | Quebec social index       | Social deprivation refers to a fragile social network, starting with the family and encompassing the community. It is characterized by individuals living alone, being a lone parent and being separated, divorced, or widowed (1,2).                                                                                                                                                                                                                                                                                                                               |  |
| 15 |                           |                                                                                                                                                                                                                                                                                                                                                                                                                                                                                                                                                                     |  |
| 16 |                           |                                                                                                                                                                                                                                                                                                                                                                                                                                                                                                                                                                     |  |
| 17 |                           |                                                                                                                                                                                                                                                                                                                                                                                                                                                                                                                                                                     |  |
| 18 |                           |                                                                                                                                                                                                                                                                                                                                                                                                                                                                                                                                                                     |  |
| 19 | Ethnocultural composition | Ethno-cultural composition refers to the community make-up of immigrant populations, and at the British Columbia-level takes into consideration factors such as the proportion of population who self-identify as visible minority, the proportion of population that is foreign-born, the proportion of population with no knowledge of either official language (linguistic isolation), and the proportion of population who are recent immigrants (arrived in five years prior to Census). (1)                                                                   |  |
| 20 |                           |                                                                                                                                                                                                                                                                                                                                                                                                                                                                                                                                                                     |  |
| 21 |                           |                                                                                                                                                                                                                                                                                                                                                                                                                                                                                                                                                                     |  |
| 22 |                           |                                                                                                                                                                                                                                                                                                                                                                                                                                                                                                                                                                     |  |
| 23 |                           |                                                                                                                                                                                                                                                                                                                                                                                                                                                                                                                                                                     |  |
| 24 |                           |                                                                                                                                                                                                                                                                                                                                                                                                                                                                                                                                                                     |  |
| 25 |                           |                                                                                                                                                                                                                                                                                                                                                                                                                                                                                                                                                                     |  |
| 26 |                           |                                                                                                                                                                                                                                                                                                                                                                                                                                                                                                                                                                     |  |
| 27 |                           |                                                                                                                                                                                                                                                                                                                                                                                                                                                                                                                                                                     |  |
| 28 |                           |                                                                                                                                                                                                                                                                                                                                                                                                                                                                                                                                                                     |  |
| 29 | Situational vulnerability | Situational vulnerability speaks to variations in socio-demographic conditions in the areas of housing and education, while taking into account other demographic characteristics. The indicators in this dimension at the British Columbia-level measure concepts such as the proportion of population that identifies as Aboriginal, the proportion of population aged 25-64 without a high school diploma, the proportion of dwellings needing major repairs, the proportion of population that is low-income, and the proportion of single parent families (1). |  |
| 30 |                           |                                                                                                                                                                                                                                                                                                                                                                                                                                                                                                                                                                     |  |
| 31 |                           |                                                                                                                                                                                                                                                                                                                                                                                                                                                                                                                                                                     |  |
| 32 |                           |                                                                                                                                                                                                                                                                                                                                                                                                                                                                                                                                                                     |  |
| 33 |                           |                                                                                                                                                                                                                                                                                                                                                                                                                                                                                                                                                                     |  |
| 34 |                           |                                                                                                                                                                                                                                                                                                                                                                                                                                                                                                                                                                     |  |
| 35 |                           |                                                                                                                                                                                                                                                                                                                                                                                                                                                                                                                                                                     |  |
| 36 |                           |                                                                                                                                                                                                                                                                                                                                                                                                                                                                                                                                                                     |  |
| 37 |                           |                                                                                                                                                                                                                                                                                                                                                                                                                                                                                                                                                                     |  |
| 38 |                           |                                                                                                                                                                                                                                                                                                                                                                                                                                                                                                                                                                     |  |
| 39 |                           |                                                                                                                                                                                                                                                                                                                                                                                                                                                                                                                                                                     |  |
| 40 | Economic dependency       | Economic dependency relates to reliance on the workforce, or a dependence on sources of income other than employment income. Indicators included in this dimension at the British Columbia-level measure concepts such as the proportion of population participating in labour force (aged 15 and older), the proportion of population aged 65 and older, the ratio of employment to population, and the dependency ratio (population aged 0-14 and aged 65 and older divided by population aged 15-64)(1).                                                         |  |
| 41 |                           |                                                                                                                                                                                                                                                                                                                                                                                                                                                                                                                                                                     |  |
| 42 |                           |                                                                                                                                                                                                                                                                                                                                                                                                                                                                                                                                                                     |  |
| 43 |                           |                                                                                                                                                                                                                                                                                                                                                                                                                                                                                                                                                                     |  |
| 44 |                           |                                                                                                                                                                                                                                                                                                                                                                                                                                                                                                                                                                     |  |
| 45 |                           |                                                                                                                                                                                                                                                                                                                                                                                                                                                                                                                                                                     |  |
| 46 |                           |                                                                                                                                                                                                                                                                                                                                                                                                                                                                                                                                                                     |  |
| 47 |                           |                                                                                                                                                                                                                                                                                                                                                                                                                                                                                                                                                                     |  |
| 48 |                           |                                                                                                                                                                                                                                                                                                                                                                                                                                                                                                                                                                     |  |
| 49 |                           |                                                                                                                                                                                                                                                                                                                                                                                                                                                                                                                                                                     |  |
| 50 |                           |                                                                                                                                                                                                                                                                                                                                                                                                                                                                                                                                                                     |  |
| 51 | Residential instability   | Residential instability speaks to the tendency of neighbourhood inhabitants to fluctuate over time, taking into consideration both housing and familial characteristics. The indicators in this dimension at the British Columbia-level measure concepts such as the proportion of dwellings that are apartment buildings, the proportion of persons living alone,                                                                                                                                                                                                  |  |
| 52 |                           |                                                                                                                                                                                                                                                                                                                                                                                                                                                                                                                                                                     |  |
| 53 |                           |                                                                                                                                                                                                                                                                                                                                                                                                                                                                                                                                                                     |  |
| 54 |                           |                                                                                                                                                                                                                                                                                                                                                                                                                                                                                                                                                                     |  |
| 55 |                           |                                                                                                                                                                                                                                                                                                                                                                                                                                                                                                                                                                     |  |
| 56 |                           |                                                                                                                                                                                                                                                                                                                                                                                                                                                                                                                                                                     |  |
| 57 |                           |                                                                                                                                                                                                                                                                                                                                                                                                                                                                                                                                                                     |  |
| 58 |                           |                                                                                                                                                                                                                                                                                                                                                                                                                                                                                                                                                                     |  |
| 59 |                           |                                                                                                                                                                                                                                                                                                                                                                                                                                                                                                                                                                     |  |
| 60 |                           |                                                                                                                                                                                                                                                                                                                                                                                                                                                                                                                                                                     |  |

|  |  |                                                                                                                            |  |
|--|--|----------------------------------------------------------------------------------------------------------------------------|--|
|  |  | the proportion of dwellings that are owned, and the proportion of the population who moved within the past five years (1). |  |
|--|--|----------------------------------------------------------------------------------------------------------------------------|--|

### References

1. Government of Canada SC. Canadian Index of Multiple Deprivation: Dataset [Internet]. 2019 [cited 2021 Jun 10]. Available from: <https://www150.statcan.gc.ca/n1/pub/45-20-0001/452000012019002-eng.htm>
2. Bureau d'information et d'études En Santé Des Populations (BIESP). Deprivation Index [Internet]. INSPQ. 2019 [cited 2021 May 27]. Available from: <https://www.inspq.qc.ca/en/deprivation/material-and-social-deprivation-index>

**S2 Table.** Comparison of baseline eligible and ineligible participants, frequencies and proportions

|                   |                                                  | Eligible (n=41,375) |                               |                               | Ineligible (n=15, 702) ‡ |                               |                               |
|-------------------|--------------------------------------------------|---------------------|-------------------------------|-------------------------------|--------------------------|-------------------------------|-------------------------------|
|                   |                                                  | Frequency           | Percent<br>(incl.<br>missing) | Percent<br>(excl.<br>missing) | Frequency                | Percent<br>(incl.<br>missing) | Percent<br>(excl.<br>missing) |
| Sex               |                                                  |                     |                               |                               |                          |                               |                               |
|                   | Male                                             | 6,823               | 16.5                          | 16.5                          | 1,697                    | 10.8                          | 18.6                          |
|                   | Female                                           | 34,552              | 83.5                          | 83.5                          | 7,442                    | 47.4                          | 81.4                          |
|                   | Missing                                          | n/a                 | n/a                           | n/a                           | 6,563                    | 41.8                          | n/a                           |
| Age               |                                                  |                     |                               |                               |                          |                               |                               |
|                   | 18-34                                            | 4,978               | 12.0                          | 12.0                          | 1,726                    | 11.0                          | 17.7                          |
|                   | 35-54                                            | 12,110              | 29.3                          | 29.3                          | 3,039                    | 19.4                          | 31.2                          |
|                   | 55+                                              | 24,287              | 58.7                          | 58.7                          | 4,981                    | 31.7                          | 51.1                          |
|                   | Missing                                          | n/a                 | n/a                           | n/a                           | 5,956                    | 37.9                          | n/a                           |
| Race/ethnicity    |                                                  |                     |                               |                               |                          |                               |                               |
|                   | Indigenous                                       | 1,757               | 4.3                           | 4.4                           | 666                      | 4.2                           | 7.2                           |
|                   | Chinese                                          | 882                 | 2.1                           | 2.2                           | 238                      | 1.5                           | 2.6                           |
|                   | White                                            | 35,026              | 84.7                          | 87.5                          | 7,439                    | 47.4                          | 79.9                          |
|                   | South Asian                                      | 606                 | 1.5                           | 1.5                           | 315                      | 2.0                           | 3.4                           |
|                   | Other                                            | 1,766               | 4.3                           | 4.4                           | 649                      | 4.1                           | 7.0                           |
|                   | Missing/Unknown                                  | 1,338               | 3.2                           | n/a                           | 6,395                    | 40.7                          | n/a                           |
| Health region     |                                                  |                     |                               |                               |                          |                               |                               |
|                   | Fraser Health                                    | 8,451               | 20.4                          | 26.1                          | 1,802                    | 11.5                          | 31.0                          |
|                   | Interior Health                                  | 6,143               | 14.8                          | 19.0                          | 1,061                    | 6.8                           | 18.3                          |
|                   | Northern Island                                  | 1,825               | 4.4                           | 5.6                           | 312                      | 2.0                           | 5.4                           |
|                   | Vancouver Coastal                                | 7,315               | 17.7                          | 22.6                          | 1,329                    | 8.5                           | 22.9                          |
|                   | Vancouver Island                                 | 8,640               | 20.9                          | 26.7                          | 1,300                    | 8.3                           | 22.4                          |
|                   | Missing                                          | 9,001               | 21.8                          | n/a                           | 9,898                    | 63.0                          | n/a                           |
| Education         |                                                  |                     |                               |                               |                          |                               |                               |
|                   | Below high school                                | 807                 | 2.0                           | 2.5                           | 41                       | 0.3                           | 7.1                           |
|                   | Below bachelor                                   | 16,928              | 40.9                          | 51.7                          | 245                      | 1.6                           | 42.5                          |
|                   | University degree                                | 15,029              | 36.3                          | 45.9                          | 290                      | 1.8                           | 50.3                          |
|                   | Missing/Unknown                                  | 8,611               | 20.8                          | n/a                           | 15,126                   | 96.3                          | n/a                           |
| Employment status |                                                  |                     |                               |                               |                          |                               |                               |
|                   | Employed full-time<br>(30 hours or<br>more/week) | 10,654              | 25.7                          | 32.0                          | 210                      | 1.2                           | 31.6                          |
|                   | Employed part-time                               | 2,993               | 7.2                           | 9.0                           | 75                       | 0.4                           | 11.3                          |
|                   | Self-employed                                    | 2,704               | 6.5                           | 8.1                           | 64                       | 0.4                           | 9.6                           |



1  
2  
3  
4  
5  
6  
7  
8  
9  
10  
11  
12  
13  
14  
15  
16  
17  
18  
19  
20  
21  
22  
23  
24  
25  
26  
27  
28  
29  
30  
31  
32  
33  
34  
35  
36  
37  
38  
39  
40  
41  
42  
43  
44  
45  
46  
47  
48  
49  
50  
51  
52  
53  
54  
55  
56  
57  
58  
59  
60

|                                      |        |      |      |        |      |      |
|--------------------------------------|--------|------|------|--------|------|------|
| Unemployed but looking for a job     | 952    | 2.3  | 2.9  | 24     | 0.1  | 3.6  |
| Unemployed and not looking for a job | 406    | 1.0  | 1.2  | 10     | 0.1  | 1.5  |
| Full-time parent, homemaker          | 879    | 2.1  | 2.6  | 10     | 0.1  | 1.5  |
| Retired                              | 12,757 | 30.8 | 38.3 | 87     | 0.5  | 13.1 |
| Student/Pupil                        | 566    | 1.4  | 1.7  | 67     | 0.4  | 10.1 |
| Long-term sick or disabled           | 968    | 2.3  | 2.9  | 31     | 0.2  | 4.7  |
| Prefer not to answer                 | 424    | 1.0  | 1.3  | 87     | 0.5  | 13.1 |
| Missing/Unknown                      | 8,072  | 19.5 | n/a  | 15,037 | 84.8 | n/a  |
| Quebec Material Deprivation Index    |        |      |      |        |      |      |
| 1 (Privileged)                       | 6,407  | 15.5 | 22.3 | 690    | 4.4  | 13.8 |
| 2                                    | 6,475  | 15.6 | 22.5 | 1,041  | 6.6  | 20.9 |
| 3                                    | 6,972  | 16.9 | 24.2 | 1,538  | 9.8  | 30.8 |
| 4                                    | 4,822  | 11.7 | 16.8 | 751    | 4.8  | 15.1 |
| 5 (Deprived)                         | 4,085  | 9.9  | 14.2 | 969    | 6.2  | 19.4 |
| Missing                              | 12,614 | 30.5 | n/a  | 10,713 | 68.2 | n/a  |
| Quebec Social Deprivation Index      |        |      |      |        |      |      |
| 1 (Privileged)                       | 4,932  | 11.9 | 17.2 | 1,018  | 6.5  | 20.4 |
| 2                                    | 4,756  | 11.5 | 16.5 | 696    | 4.4  | 14.0 |
| 3                                    | 6,311  | 15.3 | 21.9 | 1,275  | 8.1  | 25.6 |
| 4                                    | 5,932  | 14.3 | 20.6 | 897    | 5.7  | 18.0 |
| 5 (Deprived)                         | 6,830  | 16.5 | 23.8 | 1,103  | 7.0  | 22.1 |
| Missing                              | 12,614 | 30.5 | n/a  | 10,713 | 68.2 | n/a  |
| Follow up consent                    |        |      |      |        |      |      |
| Yes                                  | 20,633 | 49.9 | 63.8 | 245    | 1.6  | 39.6 |
| No                                   | 11,689 | 28.3 | 36.2 | 373    | 2.4  | 60.4 |
| Missing                              | 9,053  | 21.9 | n/a  | 15,084 | 96.1 | n/a  |
| Data linkage consent                 |        |      |      |        |      |      |
| Yes                                  | 7,290  | 17.6 | 27.3 | 95     | 0.6  | 17.3 |
| No                                   | 19,467 | 47.1 | 72.8 | 454    | 2.9  | 82.7 |
| Missing                              | 14,618 | 35.3 | n/a  | 15,153 | 96.5 | n/a  |

---

‡Does not include 4,106 duplicates

**S3 Table.** Participant profile of BC-Mix follow up surveys: frequencies and proportions (%)

|                           | Follow up #1<br>(n=10,993) | Follow up #2<br>(n=8,164) | Follow up #3<br>(n=6,375) | Follow up #4<br>(n=4,981) | Follow up #5<br>(n=3,891) | Follow up #6<br>(n=3,184) | Follow up #7<br>(n=2,417) | Follow up #8<br>(n=1,760) |
|---------------------------|----------------------------|---------------------------|---------------------------|---------------------------|---------------------------|---------------------------|---------------------------|---------------------------|
| <b>Complete responses</b> | 10619 (96.6)               | 7935 (97.2)               | 6265 (98.3)               | 4906 (98.5)               | 3836 (98.6)               | 3137 (98.5)               | 2397(99.2)                | 1733 (98.5)               |
| <b>Sex</b>                |                            |                           |                           |                           |                           |                           |                           |                           |
| Male                      | 1590 (14.5)                | 1115 (13.7)               | 843 (13.2)                | 646 (13.0)                | 495 (12.7)                | 404 (12.17)               | 312 (12.9)                | 217 (12.3)                |
| Female                    | 9403 (85.5)                | 7049 (86.3)               | 5532 (86.8)               | 4335 (87.0)               | 3396 (87.3)               | 2780 (87.3)               | 2105 (87.1)               | 1543 (87.7)               |
| <b>Age</b>                |                            |                           |                           |                           |                           |                           |                           |                           |
| 18-34                     | 1128 (10.3)                | 731 (9.0)                 | 497 (7.8)                 | 363 (7.3)                 | 257 (6.6)                 | 199 (6.3)                 | 152 (6.3)                 | 109 (6.2)                 |
| 35-54                     | 3013 (27.4)                | 2105 (25.8)               | 1533 (24.1)               | 1127 (22.6)               | 846 (21.7)                | 662 (20.8)                | 495 (20.5)                | 343 (19.5)                |
| 55+                       | 6852 (62.3)                | 5328 (65.3)               | 4345 (68.2)               | 3491 (70.1)               | 2788 (71.7)               | 2323 (73.0)               | 1770 (73.2)               | 1308 (74.3)               |
| <b>Race/ethnicity</b>     |                            |                           |                           |                           |                           |                           |                           |                           |
| Indigenous                | 342 (3.1)                  | 229 (2.8)                 | 162 (2.5)                 | 130 (2.6)                 | 91 (2.3)                  | 71 (2.2)                  | 54 (2.2)                  | 38 (2.2)                  |
| Chinese                   | 199 (1.8)                  | 124 (1.5)                 | 98 (1.5)                  | 66 (1.3)                  | 48 (1.2)                  | 39 (1.2)                  | 25 (1.0)                  | 16 (0.9)                  |
| White                     | 9870 (89.8)                | 7415 (90.8)               | 5833 (91.5)               | 4586 (92.1)               | 3602 (92.6)               | 2959 (92.9)               | 2254 (93.3)               | 1642 (93.3)               |
| South Asian               | 79 (0.7)                   | 39 (0.5)                  | 30 (0.5)                  | 20 (0.4)                  | 15 (0.4)                  | 14 (0.4)                  | 12 (0.5)                  | 12 (0.7)                  |
| Other                     | 316 (2.9)                  | 229 (2.8)                 | 154 (2.4)                 | 108 (2.2)                 | 86 (2.2)                  | 63 (2.0)                  | 45 (1.9)                  | 35 (2.0)                  |
| Missing/Unknown           | 187(1.7)                   | 128 (1.6)                 | 98 (1.5)                  | 71 (1.4)                  | 49 (1.3)                  | 38 (1.2)                  | 27 (1.1)                  | 17 (1.0)                  |
| <b>Health region</b>      |                            |                           |                           |                           |                           |                           |                           |                           |
| Fraser Health             | 2748 (25.0)                | 2039 (25.0)               | 1590 (24.9)               | 1243 (25.0)               | 964 (24.8)                | 792 (24.9)                | 613 (25.4)                | 462 (26.3)                |
| Interior Health           | 1926 (17.5)                | 1435 (17.6)               | 1156 (18.1)               | 907 (18.2)                | 703 (18.1)                | 579 (18.2)                | 432 (17.9)                | 317 (18.0)                |
| Northern Island           | 506 (4.6)                  | 374 (4.6)                 | 280 (4.4)                 | 212 (4.3)                 | 162 (4.2)                 | 116 (3.4)                 | 88 (3.6)                  | 63 (3.6)                  |
| Vancouver Coastal         | 2706 (24.6)                | 1992 (24.4)               | 1540 (24.2)               | 1178 (23.7)               | 932 (24.0)                | 758 (23.8)                | 577 (23.9)                | 403 (22.9)                |
| Vancouver Island          | 3059 (27.8)                | 2303 (28.2)               | 1794 (28.1)               | 1430 (28.7)               | 1122 (28.8)               | 934 (29.3)                | 703 (29.1)                | 513 (29.2)                |
| Missing/Unknown           | 48 (0.4)                   | 21 (0.3)                  | 15 (0.2)                  | 11 (0.2)                  | 8 (0.2)                   | 5 (0.2)                   | 4 (0.2)                   | 2 (0.1)                   |
| <b>Education</b>          |                            |                           |                           |                           |                           |                           |                           |                           |
| Below high school         | 173 (1.5)                  | 123 (1.5)                 | 89 (1.4)                  | 68 (1.4)                  | 51 (1.3)                  | 37 (1.2)                  | 26 (1.1)                  | 16 (0.9)                  |
| Below bachelor            | 5236 (47.6)                | 3835 (47.0)               | 2979 (46.7)               | 2303 (46.2)               | 1771 (45.5)               | 1453 (45.6)               | 1108 (45.8)               | 802 (45.6)                |

|                                          | Follow up #1<br>(n=10,993) | Follow up #2<br>(n=8,164) | Follow up #3<br>(n=6,375) | Follow up #4<br>(n=4,981) | Follow up #5<br>(n=3,891) | Follow up #6<br>(n=3,184) | Follow up #7<br>(n=2,417) | Follow up #8<br>(n=1,760) |
|------------------------------------------|----------------------------|---------------------------|---------------------------|---------------------------|---------------------------|---------------------------|---------------------------|---------------------------|
| University degree                        | 5529 (50.3)                | 4169 (51.1)               | 3283 (51.5)               | 2594 (52.1)               | 2057 (52.9)               | 1683 (52.9)               | 1278 (52.9)               | 939 (53.4)                |
| Missing/Unknown                          | 55 (0.5)                   | 37 (0.5)                  | 24 (0.4)                  | 16 (0.3)                  | 12 (0.3)                  | 11 (0.4)                  | 5 (0.2)                   | 31 (0.2)                  |
| <b>Quebec Material Deprivation Index</b> |                            |                           |                           |                           |                           |                           |                           |                           |
| 1 (Privileged)                           | 1547 (14.1)                | 1072 (13.75)              | 896 (14.1)                | 720 (14.5)                | 569 (14.6)                | 435 (13.7)                | 344 (14.2)                | 253 (14.4)                |
| 2                                        | 2078 (18.9)                | 1547 (19.0)               | 1198 (18.8)               | 1008 (20.2)               | 806 (20.7)                | 665 (20.9)                | 500 (20.7)                | 366 (20.8)                |
| 3                                        | 2994 (27.3)                | 2184 (26.8)               | 1674 (26.3)               | 1273 (25.6)               | 973 (25.0)                | 835 (26.2)                | 642 (26.6)                | 450 (25.6)                |
| 4                                        | 1277 (11.6)                | 942 (11.64)               | 748 (11.7)                | 580 (11.6)                | 475 (12.2)                | 379 (11.9)                | 285 (11.8)                | 215 (12.2)                |
| 5 (Deprived)                             | 1668 (15.2)                | 1290 (15.8)               | 1033 (16.2)               | 728 (15.7)                | 609 (15.7)                | 504 (15.8)                | 375 (15.5)                | 278 (15.8)                |
| Missing                                  | 1429 (13.0)                | 1069 (13.1)               | 826 (13.0)                | 616 (12.4)                | 459 (11.8)                | 366 (11.5)                | 271 (11.2)                | 198 (11.3)                |
| <b>Quebec Social Deprivation Index</b>   |                            |                           |                           |                           |                           |                           |                           |                           |
| 1 (Privileged)                           | 2188 (19.9)                | 1641 (20.1)               | 1286 (20.2)               | 1063 (21.3)               | 830 (20.3)                | 658 (20.7)                | 509 (21.1)                | 368 (20.9)                |
| 2                                        | 1441 (13.1)                | 1051 (12.9)               | 787 (12.4)                | 603 (12.1)                | 480 (12.3)                | 411 (12.9)                | 314 (13.0)                | 225 (12.8)                |
| 3                                        | 2478 (22.5)                | 1831 (22.4)               | 1480 (23.2)               | 1148 (23.1)               | 922 (23.7)                | 769 (24.2)                | 574 (23.8)                | 419 (23.8)                |
| 4                                        | 1601 (14.6)                | 1236 (15.1)               | 945 (14.8)                | 743 (14.9)                | 578 (14.9)                | 488 (15.3)                | 370 (15.3)                | 290 (16.5)                |
| 5 (Deprived)                             | 1856 (16.9)                | 1336 (16.4)               | 1051 (16.5)               | 808 (16.2)                | 622 (16.0)                | 392 (15.5)                | 379 (15.7)                | 260 (14.8)                |
| Missing/Unknown                          | 1429 (13)                  | 1069 (13.1)               | 826 (13.0)                | 616 (12.4)                | 459 (11.8)                | 492 (11.5)                | 271 (11.2)                | 198 (11.3)                |
| <b>Follow up consent</b>                 |                            |                           |                           |                           |                           |                           |                           |                           |
| Yes                                      | 10357 (94.2)               | 7793 (95.5)               | 6182 (97.0)               | 4857 (97.5)               | 3789 (97.4)               | 3106 (97.6)               | 2380 (98.5)               | 1714 (97.4)               |
| No                                       | 262 (2.4)                  | 142 (1.7)                 | 83 (1.3)                  | 49 (1.0)                  | 47 (1.2)                  | 31 (1.0)                  | 17 (0.7)                  | 19 (1.1)                  |
| Missing                                  | 374 (3.4)                  | 229 (2.8)                 | 110 (1.7)                 | 75 (1.5)                  | 55 (1.4)                  | 47 (1.5)                  | 20 (0.8)                  | 27 (1.5)                  |

S3 Table. Participant profile of BC-Mix follow up surveys: frequencies and proportions (%) [continued]

|                                | Follow up#9<br>(n=1,200) | Follow up #10<br>(n=488) |
|--------------------------------|--------------------------|--------------------------|
| <b>Complete responses</b>      | 1,178 (98.2)             | 483 (99.0)               |
| <b>Sex</b>                     |                          |                          |
| Male                           | 136 (11.3)               | 54 (11.1)                |
| Female                         | 1064 (88.7)              | 434 (88.9)               |
| <b>Age</b>                     |                          |                          |
| 18-34                          | 70 (5.8)                 | 30 (6.2)                 |
| 35-54                          | 226 (18.8)               | 87 (17.8)                |
| 55+                            | 904 (75.3)               | 371 (76.0)               |
| <b>Race/ethnicity</b>          |                          |                          |
| Aboriginal                     | 49 (4.1)                 | 18 (3.7)                 |
| Chinese                        | 12 (1.0)                 | 8 (1.6)                  |
| Not a visible minority (White) | 1117 (93.1)              | 453 (92.8)               |
| South Asian                    | 8 (0.7)                  | 3 (0.6)                  |
| Other                          | 0 (0)                    | 0 (0)                    |
| Missing/Unknown                | 14 (1.2)                 | 6 (1.2)                  |
| <b>Health region</b>           |                          |                          |
| Interior Health                | 223 (18.6)               | 88 (18.0)                |
| Fraser Health                  | 319 (26.6)               | 129 (26.4)               |
| Vancouver Coastal              | 268 (22.3)               | 106 (21.7)               |
| Vancouver Island               | 355 (29.6)               | 152 (31.2)               |
| Northern Island                | 33 (2.7)                 | 12 (2.5)                 |
| Missing/Unknown                | 2 (0.2)                  | 1 (0.2)                  |
| <b>Education</b>               |                          |                          |
| Below high school              | 7 (0.6)                  | 3 (0.6)                  |

|    |                          |                   |                        |
|----|--------------------------|-------------------|------------------------|
| 1  |                          |                   |                        |
| 2  |                          |                   |                        |
| 3  |                          | Below bachelor    | 549 (45.7) 205 (42.0)  |
| 4  |                          | University degree | 643 (53.6) 279 (57.2)  |
| 5  |                          | Missing/Unknown   | 1 (0.1) 1 (0.2)        |
| 6  |                          |                   |                        |
| 7  |                          |                   |                        |
| 8  | <b>Quebec Material</b>   |                   |                        |
| 9  | <b>Deprivation Index</b> |                   |                        |
| 10 |                          | 1 (Privileged)    | 166 (13.8) 71 (14.6)   |
| 11 |                          | 2                 | 257 (21.4) 94 (19.3)   |
| 12 |                          | 3                 | 296 (24.7) 125 (25.6)  |
| 13 |                          | 4                 | 142 (11.8) 50 (10.3)   |
| 14 |                          | 5 (Deprived)      | 192 (16.0) 85 (17.4)   |
| 15 |                          | Missing           | 147 (12.3) 63 (12.9)   |
| 16 |                          |                   |                        |
| 17 |                          |                   |                        |
| 18 | <b>Quebec Social</b>     |                   |                        |
| 19 | <b>Deprivation Index</b> |                   |                        |
| 20 |                          | 1 (Privileged)    | 253 (21.1) 88 (12.9)   |
| 21 |                          | 2                 | 165 (13.8) 63 (12.9)   |
| 22 |                          | 3                 | 276 (23.0) 123 (25.2)  |
| 23 |                          | 4                 | 192 (16.0) 80 (16.4)   |
| 24 |                          | 5 (Deprived)      | 167 (13.9) 71 (14.6)   |
| 25 |                          | Missing           | 147 (12.2) 63 (12.9)   |
| 26 |                          |                   |                        |
| 27 |                          |                   |                        |
| 28 | <b>Follow up consent</b> |                   |                        |
| 29 |                          |                   |                        |
| 30 |                          | Yes               | 1170 (97.5) 475 (97.3) |
| 31 |                          | No                | 8 (0.7) 8 (1.6)        |
| 32 |                          | Missing           | 22 (1.8) 5 (1.0)       |
| 33 |                          |                   |                        |

**S4 Table.** BC-Mix eligible sample (baseline) by month recruited

| Month           | Number of eligible (n=41,375) | % of sample |
|-----------------|-------------------------------|-------------|
| September, 2020 | 6,488                         | 15.68       |
| October, 2020   | 3,516                         | 8.5         |
| November, 2020  | 1,653                         | 4           |
| December, 2020  | 3,335                         | 8.1         |
| January, 2021   | 2,460                         | 6           |
| February, 2021  | 994                           | 2.4         |
| March, 2021     | 1,353                         | 3.3         |
| April, 2021     | 2,507                         | 6.1         |
| May, 2021       | 4,696                         | 11.4        |
| June, 2021      | 8,238                         | 19.9        |
| July, 2021      | 6,135                         | 14.8        |

**S5 Table.** Comparison of participant eligibility across survey rounds

|                                | Baseline<br>survey | Follow<br>up#1 | Follow<br>up #2 | Follow<br>up #3 | Follow<br>up #4 | Follow<br>up #5 | Follow<br>up#6 | Follow<br>up#7 | Follow<br>up#8 | Follow<br>up#9 | Follow<br>up#10 |
|--------------------------------|--------------------|----------------|-----------------|-----------------|-----------------|-----------------|----------------|----------------|----------------|----------------|-----------------|
| Total<br>(eligible+ineligible) | 57,077             | 11,677         | 8,624           | 6,657           | 5,173           | 4,037           | 3,309          | 2,503          | 1,815          | 1,234          | 513             |
| Eligible                       | 41,375             | 10,993         | 8,164           | 6,375           | 4,981           | 3,891           | 3,184          | 2,417          | 1,760          | 1,200          | 488             |
| % eligible                     | 72.5               | 94.1           | 94.7            | 95.8            | 96.3            | 96.4            | 96.2           | 96.6           | 97.0           | 97.2           | 95.1            |



1  
2  
3  
4  
5  
6  
7  
8  
9  
10  
11  
12  
13  
14  
15  
16  
17  
18  
19  
20  
21  
22  
23  
24  
25  
26  
27  
28  
29  
30  
31  
32  
33  
34  
35  
36  
37  
38  
39  
40  
41  
42  
43  
44  
45  
46  
47

**S6 Table.** Participant profile of BC-Mix baseline data (n=33, 650), using at least 67% survey completion threshold

|                |                 | Survey                |               |                    |            |
|----------------|-----------------|-----------------------|---------------|--------------------|------------|
|                |                 | Un-weighted frequency | Un-weighted % | Weighted frequency | Weighted % |
| Sex            |                 |                       |               |                    |            |
|                | Male            | 5,362                 | 15.9          | 16680              | 49.4       |
|                | Female          | 28, 288               | 84.1          | 17058              | 50.6       |
|                | Missing         |                       |               |                    |            |
| Age            |                 |                       |               |                    |            |
|                | 18-34           | 3,957                 | 11.8          | 9,063              | 26.9       |
|                | 35-54           | 9,674                 | 28.8          | 11,111             | 32.9       |
|                | 55+             | 20,019                | 59.5          | 13564              | 40.2       |
| Race/ethnicity |                 |                       |               |                    |            |
|                | Indigenous      | 1,394                 | 4.1           | 1,718              | 5.1        |
|                | Chinese         | 711                   | 2.1           | 3,601              | 10.7       |
|                | White           | 28,728                | 85.4          | 21,216             | 62.9       |
|                | South Asian     | 405                   | 1.2           | 2,478              | 7.3        |
|                | Other           | 1,385                 | 4.1           | 3,429              | 10.2       |
|                | Missing/Unknown | 1,027                 | 3.1           | 1300               | 3.9        |
| Health region  |                 |                       |               |                    |            |
|                | Fraser Health   | 8038                  | 26.1          | 11327              | 33.6       |
|                | Interior Health | 5,806                 | 118.9         | 5023               | 14.9       |
|                | Northern Island | 1735                  | 5.6           | 1732               | 5.1        |

For peer review only

|                   |                                            | Survey                |               |                    |            |
|-------------------|--------------------------------------------|-----------------------|---------------|--------------------|------------|
|                   |                                            | Un-weighted frequency | Un-weighted % | Weighted frequency | Weighted % |
| Education         | Vancouver Coastal                          | 6993                  | 22.7          | 7739               | 22.9       |
|                   | Vancouver Island                           | 8234                  | 26.7          | 5308               | 15.7       |
|                   | Missing/Unknown                            | 2844                  | n/a           | 2610               | 7.7        |
|                   | Below high school                          | 807                   | 2.4           | 1,096              | 3.2        |
|                   | Below bachelor                             | 16,928                | 50.3          | 15,176             | 45.0       |
|                   | University degree                          | 15,029                | 44.7          | 16,273             | 48.2       |
|                   | Missing/Unknown                            | 886                   | 2.6           | 1,193              | 3.1        |
| Employment status | Employed full-time (30 hours or more/week) | 10,654                | 32.0          | 1308               | 40.8       |
|                   | Employed part-time                         | 2,993                 | 9.0           | 3,131              | 9.4        |
|                   | Self-employed                              | 2,704                 | 8.1           | 3,013              | 9.0        |
|                   | Unemployed but looking for a job           | 952                   | 2.9           | 1,522              | 4.6        |
|                   | Unemployed and not looking for a job       | 406                   | 1.2           | 511                | 1.5        |
|                   | Full-time parent, homemaker                | 879                   | 2.6           | 740                | 2.2        |
|                   | Retired                                    | 12,757                | 38.3          | 8,096              | 24.3       |
|                   | Student/Pupil                              | 566                   | 1.7           | 1,197              | 3.6        |

1  
2  
3  
4  
5  
6  
7  
8  
9  
10  
11  
12  
13  
14  
15  
16  
17  
18  
19  
20  
21  
22  
23  
24  
25  
26  
27  
28  
29  
30  
31  
32  
33  
34  
35  
36  
37  
38  
39  
40  
41  
42  
43  
44  
45  
46  
47

|                            |                            | Survey                |               |                    |            |
|----------------------------|----------------------------|-----------------------|---------------|--------------------|------------|
|                            |                            | Un-weighted frequency | Un-weighted % | Weighted frequency | Weighted % |
| Material Deprivation Index | Long-term sick or disabled | 968                   | 2.9           | 914                | 2.7        |
|                            | Prefer not to answer       | 424                   | 1.3           | 620                | 1.9        |
|                            | Missing/Unknown            | 347                   | n/a           | n/a                | n/a        |
|                            | 1 (Privileged)             | 6,219                 | 22.8          | 6,106              | 22.1       |
|                            | 2                          | 6,199                 | 22.6          | 5,850              | 21.1       |
|                            | 3                          | 6,565                 | 24.0          | 5935               | 21.4       |
|                            | 4                          | 4,616                 | 16.8          | 5,179              | 18.7       |
|                            | 5 (Deprived)               | 3,810                 | 13.9          | 4,612              | 16.7       |
|                            | Missing                    | 6,241                 | n/a           | n/a                | n/a        |
|                            | Follow up consent          | Yes                   | 20,633        | 68.8               | 19,051     |
| No                         |                            | 11,689                | 36.1          | 13,275             | 41.1       |
| Missing                    |                            | 1,328                 | n/a           | n/a                | n/a        |
| Data linkage consent       | Yes                        | 7,290                 | 27.3          | 7,318              | 20.4       |
|                            | No                         | 19,467                | 72.8          | 20,362             | 73.6       |
|                            | Missing                    | 6,893                 | n/a           | n/a                | n/a        |

**S7 Table. Comparison of participants with 100% survey completion versus those less than 100% completion (baseline data)**

|                |                   | 100% completion (n=26, 757) |               | < 100% completion (n=14,618) |               |
|----------------|-------------------|-----------------------------|---------------|------------------------------|---------------|
|                |                   | Un-weighted Frequency       | Un-weighted % | Un-weighted Frequency        | Un-weighted % |
| Sex            | Male              | 4,407                       | 16.5          | 2,416                        | 16.5          |
|                | Female            | 22,350                      | 83.5          | 12,202                       | 83.5          |
| Age            | 18-34             | 3,383                       | 12.6          | 1,595                        | 10.9          |
|                | 35-54             | 8,056                       | 30.1          | 4,054                        | 27.7          |
|                | 55+               | 15,318                      | 57.3          | 8,969                        | 61.4          |
| Race/ethnicity | Indigenous        | 1,072                       | 4.1           | 685                          | 4.7           |
|                | Chinese           | 627                         | 2.3           | 255                          | 1.7           |
|                | White             | 22,842                      | 85.4          | 12,184                       | 83.4          |
|                | South Asian       | 305                         | 1.1           | 301                          | 2.1           |
|                | Other             | 1,123                       | 4.2           | 643                          | 4.4           |
|                | Missing/Unknown   | 788                         | 3.0           | 550                          | 3.8           |
| Health region  | Fraser Health     | 6,928                       | 26.1          | 1,523                        | 26.3          |
|                | Interior Health   | 4,923                       | 18.5          | 1,220                        | 21.1          |
|                | Northern Island   | 1,465                       | 5.5           | 360                          | 6.2           |
|                | Vancouver Coastal | 6,175                       | 23.2          | 1,140                        | 19.7          |
|                | Vancouver Island  | 7,095                       | 26.7          | 1,545                        | 26.7          |

|    |           |                   |        |      |       |      |
|----|-----------|-------------------|--------|------|-------|------|
| 1  |           |                   |        |      |       |      |
| 2  |           |                   |        |      |       |      |
| 3  |           | Missing/Unknown   | 171    | n/a  | 8,830 | n/a  |
| 4  |           |                   |        |      |       |      |
| 5  | Education |                   |        |      |       |      |
| 6  |           | Below high school | 585    | 2.2  | 222   | 1.5  |
| 7  |           | Below bachelor    | 13,155 | 49.2 | 3,773 | 25.8 |
| 8  |           |                   |        |      |       |      |
| 9  |           | University degree | 12,634 | 47.2 | 2,395 | 16.4 |
| 10 |           | Missing/Unknown   | 383    | 1.4  | 8,228 | 56.3 |
| 11 |           |                   |        |      |       |      |
| 12 | Follow up |                   |        |      |       |      |
| 13 | consent   |                   |        |      |       |      |
| 14 |           | Yes               | 16,404 | 61.3 | 4,229 | 76.0 |
| 15 |           | No                | 10,353 | 38.7 | 1,336 | 24.0 |
| 16 |           | Missing           | n/a    | n/a  | 9,053 | n/a  |
| 17 |           |                   |        |      |       |      |
| 18 |           |                   |        |      |       |      |
| 19 |           |                   |        |      |       |      |
| 20 |           |                   |        |      |       |      |
| 21 |           |                   |        |      |       |      |
| 22 |           |                   |        |      |       |      |
| 23 |           |                   |        |      |       |      |
| 24 |           |                   |        |      |       |      |
| 25 |           |                   |        |      |       |      |
| 26 |           |                   |        |      |       |      |
| 27 |           |                   |        |      |       |      |
| 28 |           |                   |        |      |       |      |
| 29 |           |                   |        |      |       |      |
| 30 |           |                   |        |      |       |      |
| 31 |           |                   |        |      |       |      |
| 32 |           |                   |        |      |       |      |
| 33 |           |                   |        |      |       |      |
| 34 |           |                   |        |      |       |      |
| 35 |           |                   |        |      |       |      |
| 36 |           |                   |        |      |       |      |
| 37 |           |                   |        |      |       |      |
| 38 |           |                   |        |      |       |      |
| 39 |           |                   |        |      |       |      |
| 40 |           |                   |        |      |       |      |
| 41 |           |                   |        |      |       |      |
| 42 |           |                   |        |      |       |      |
| 43 |           |                   |        |      |       |      |
| 44 |           |                   |        |      |       |      |
| 45 |           |                   |        |      |       |      |
| 46 |           |                   |        |      |       |      |
| 47 |           |                   |        |      |       |      |
